# Supplementary material for: Triflic acid-catalyzed metal-free synthesis of (E)-2-cyanoacrylamides and 3-substituted azetidine-2,4-diones
Source: Royal Society of Chemistry journal article supplement (doi:10.1039/c7nj05169g), 2018-01-01

## Electronic Supplementary Information(ESI)

### “Triflic Acid Catalyzed Metal-Free Synthesis of (*E*)-2-Cyanoacrylamides and 3-Substituted Azetidine-2,4-diones”

Bapurao D. Rupanwar, Santosh S. Chavan, Anil M. Shelke and Gurunath M. Suryavanshi\*

*Chemical Engineering & Process Development Division, CSIR-National Chemical Laboratory,*

*Dr. HomiBhabha Road, Pune, Maharashtra, India- 411008.*

\*Corresponding author: Tel.: +91 20 25902547; Fax: +91 20 25902676;

e-mail: [gm.suryavanshi@ncl.res.in](mailto:gm.suryavanshi@ncl.res.in)

---

#### Table of Contents

| <b>Sr.No.</b> | <b>Description</b>                                                                       | <b>Page No.</b> |
|---------------|------------------------------------------------------------------------------------------|-----------------|
| 1             | General information                                                                      | S2              |
| 2             | Optimization study                                                                       | S3-S4           |
| 3             | General procedure for the synthesis of compound <b>3a-3ze</b> and<br><b>5a-d</b>         | S4-S5           |
| 4             | General procedure for the synthesis of compound <b>7a-b</b>                              | S5              |
| 5             | General procedure for the synthesis of 3-substituted<br>azetidine-2,4-diones <b>9a-h</b> | S5              |
| 6             | Procedure for the gram scale synthesis of <b>3e</b>                                      | S6              |
| 7             | Spectral data                                                                            | S6-S21          |
| 8             | <sup>1</sup> H and <sup>13</sup> C NMR spectra                                           | S22-62          |
| 9             | NOESY of 3n                                                                              | S63             |

---

## 1. General information

Unless otherwise specified, all reactions were carried out under an open atmosphere in solvent at reflux condition and reaction temperatures are reported as the temperature of the bath surrounding the reaction vessel. All reagents and solvents were obtained from commercial suppliers and Aldrich, Merck Millipore, Alfa Aesar and Avra Synthesis. Aldehydes were purified either by distillation or washing with  $\text{NaHCO}_3$  after dissolving in ether, prior to use and all AR grade solvents were used without further purification.

Petroleum ether of boiling range 60–80 °C was used. Melting points are uncorrected.  $^1\text{H}$  NMR and  $^{13}\text{C}$  NMR spectra were recorded on AC-200, 400, 500 MHz NMR spectrometers. Deuterated solvent  $\text{CDCl}_3 + \text{CCl}_4$  (70:30) were used as internal standard and singlet at 96.1 ppm in  $^{13}\text{C}$  NMR corresponds to carbon of  $\text{CCl}_4$ . The septet at 39.51 ppm in  $^{13}\text{C}$  NMR corresponds to carbon of  $\text{DMSO-D}_6$ . HRMS data for all new compounds were recorded using Orbitrap mass analyzer associated with Accela 1250 pump. Purification was done using column chromatography (100-200 mesh). The reactions were monitored by TLC visualized by UV (254 nm) and/or with iodine. Coupling constants are given in hertz (Hz) and the classical abbreviations are used to describe the signal multiplicities.

## 2. Optimization study

Table 1. Optimization of the Reaction Conditions<sup>a</sup>

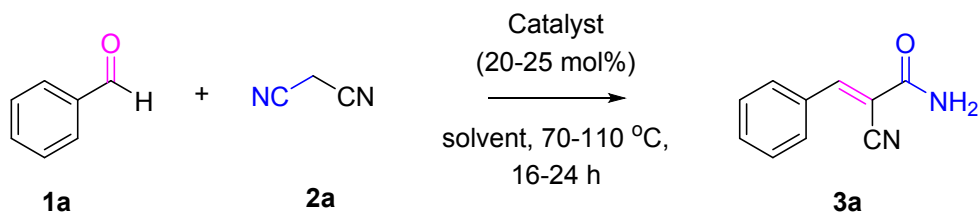

| Entry           | Catalyst                                          | Solvent     | Temp. (°C) | Time (h) | Yield (%) <sup>b</sup> |
|-----------------|---------------------------------------------------|-------------|------------|----------|------------------------|
| 1               | ZnCl <sub>2</sub>                                 | DCE         | 110        | 16       | 60                     |
| 2               | FeCl <sub>3</sub>                                 | DCE         | 110        | 16       | N.R                    |
| 3               | AlCl <sub>3</sub>                                 | DCE         | 110        | 16       | N.R                    |
| 4               | MgCl <sub>2</sub>                                 | DCE         | 110        | 16       | N.R                    |
| 5               | TiCl <sub>4</sub>                                 | DCE         | 110        | 16       | N.R                    |
| 6               | AgCOCF <sub>3</sub>                               | DCE         | 110        | 16       | Trace                  |
| 7               | BF <sub>3</sub> .Et <sub>2</sub> O                | DCE         | 110        | 16       | Trace                  |
| 8               | TFA                                               | DCE         | 110        | 16       | Trace                  |
| 9               | (CF <sub>3</sub> SO <sub>2</sub> ) <sub>2</sub> O | DCE         | 110        | 16       | N.R                    |
| 10              | TFAA                                              | DCE         | 110        | 16       | 53                     |
| 11              | TfOH                                              | DCE         | 110        | 24       | 84                     |
| 12              | TsOH                                              | DCE         | 110        | 16       | 79                     |
| 13              | TfOH                                              | PhMe        | 110        | 24       | 36                     |
| 14              | TfOH                                              | DMSO        | 110        | 24       | 41                     |
| 15              | TfOH                                              | 1,4-dioxane | 110        | 24       | 47                     |
| 16              | TfOH                                              | THF         | 70         | 24       | 31                     |
| 17              | TfOH                                              | MeCN        | 90         | 24       | 70                     |
| 18              | TfOH                                              | EtOH        | 80         | 24       | 46                     |
| 19              | TfOH                                              | IPA         | 110        | 24       | N.R                    |
| 20              | TfOH                                              | DMF         | 110        | 24       | N.R                    |
| 21 <sup>c</sup> | TfOH                                              | DCE         | 110        | 24       | 78                     |

<sup>a</sup>Reaction conditions: Benzaldehyde **1a** (1 mmol), malononitrile **2a** (1.2 mmol), catalyst (25 mol%), solvent (5 mL), 70-110 °C for 16-24 h. <sup>b</sup>Isolated yields. <sup>c</sup>Catalyst TfOH (20 mol%), N.R=No reaction.

### General procedure for the Optimization of Reaction Conditions

In a 25 mL round bottom flask benzaldehyde **1a** (1 mmol), malanonitrile **2a** (1.2 mmol), catalyst (20-25 mol%) and solvent (5 mL) were added. The round bottom flask was equipped with condenser and the resultant reaction mixture was refluxed at 70-110 °C for 24 h (Table 1) and the progress of the reaction was monitored by TLC. Upon completion of the reaction, reaction mixture was dried under vacuum. Then the crude reaction mixture was diluted with ethyl acetate (10 mL) and filtered through a pad of silica gel and eluted with EtOAc (20 mL). The solvent was evaporated and the crude residue was preadsorbed on silica gel and purified by column chromatography to afford the corresponding compound **3a** in moderate to good yields.

### 3. General Procedure for the Synthesis of Compound 3a-3zd and 5a-d

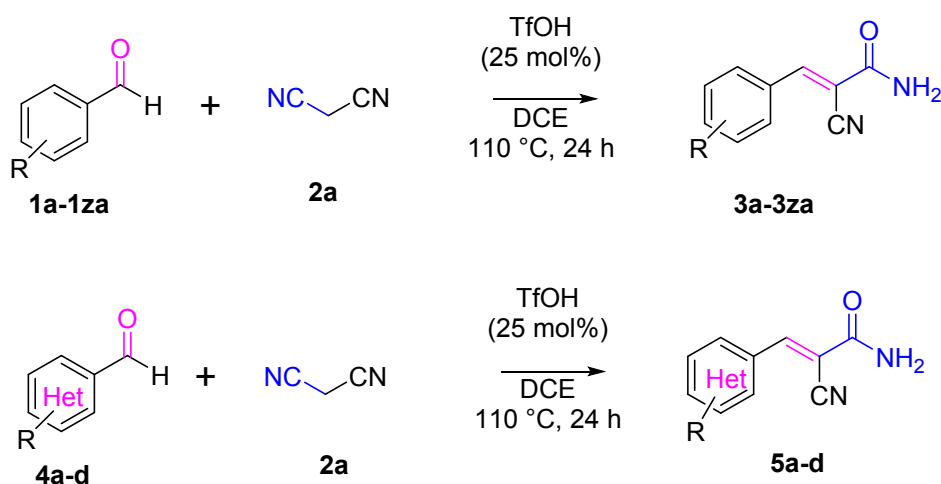

In a 25 mL round bottom flask aldehydes **1a-1za** (1 mmol) or **4a-d** (1 mmol), malanonitrile **2a** (1.2 mmol), catalyst TfOH (25 mol%) and DCE (5 mL) were taken. The round bottom flask was equipped with condenser and the resultant reaction mixture was refluxed at 110 °C for 24 h and progress of the reaction was monitored by TLC. Upon completion of the reaction, the reaction mixture was dried under vacuum. Then the crude reaction mixture was diluted with ethyl acetate (10 mL) and filtered through a pad of silica gel and eluted with EtOAc (20 mL). The solvent was evaporated and the crude residue was preadsorbed on silica gel and purified

by column chromatography to afford the corresponding (*E*)-2-cyanoacrylamides **3a-3za** and **5a-d** in good to excellent yields.

#### 4. General Procedure for the Synthesis of Compounds **7a** and **7b**

Compound **7a** and **7b** was prepared by using similar reaction procedure as above used for the synthesis of **3a-3zd** and **5a-d**.

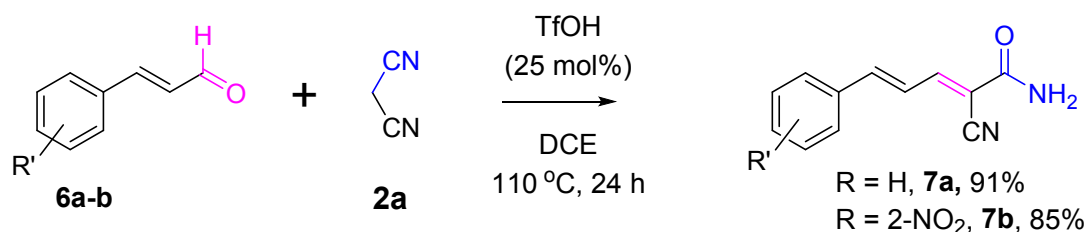

#### 5. General Procedure for the Synthesis of 3-Substituted Azetidine-2,4-diones **9a-h**

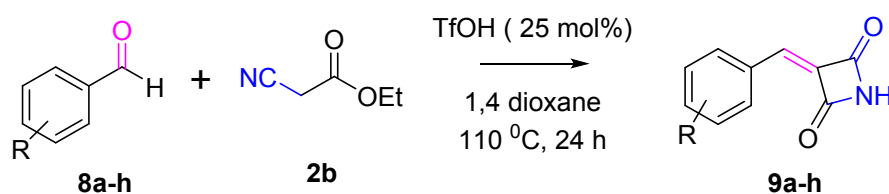

In a 10 mL round bottom flask equipped with a magnetic stir bar was added the aldehyde **8a-h** (1 mmol), ethyl cyanoacetate **2b** (1.2 mmol), TfOH (25 mol %) and 1,4-dioxane (5 mL). Then the resultant reaction mixture was kept in stirring at 110 °C for 14 h. Upon completion of the reaction, the reaction mixture was dried under vacuum. Then the crude reaction mixture was diluted with ethyl acetate (10 mL) and washed with water. The solvent was evaporated and the crude residue was preadsorbed on silica gel and purified by column chromatography to afford the corresponding 3-substituted azetidine-2,4-diones **9a-h** in 75-89% yields.

## 6. General Procedure for the Gram Scale Synthesis of 3e

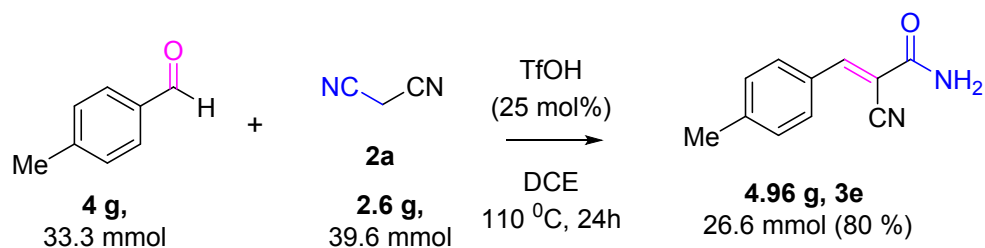

Following the general procedure as described above for the synthesis of (*E*)-2-cyanoacrylamides, a flame-dried flask was charged with 4-methylbenzaldehyde (**4g**, 33.3 mmol), malononitrile **2a** (**2.6g**, 39.6 mmol), catalyst TfOH (**1.25g**, 0.0083 mmol) and 1,4-dioxane (35 mL). The round bottom flask was equipped with condenser and the resultant reaction mixture was refluxed at 110 °C for 24 h. The progress of the reaction was monitored by TLC. Upon completion of the reaction, the reaction mixture was dried under vacuum. Then the crude reaction mixture was diluted with ethyl acetate (50 mL) and filtered through a pad of silica gel and eluted with EtOAc (600 mL). The solvent was evaporated and the crude residue was preadsorbed on silica gel and purified by column chromatography with eluted solvent (pet.ether + ethylacetate 65:35) to afford the corresponding (*E*)-2-cyano-3-(p-tolyl)acrylamide derivative **3e** in (**4.96g**, 80%) yield.

## 7. Spectral Data:

|                                                                                     |                                                                                                                                                                                                                                                                                                                                                                                                                                                                                                                                                                                                                   |
|-------------------------------------------------------------------------------------|-------------------------------------------------------------------------------------------------------------------------------------------------------------------------------------------------------------------------------------------------------------------------------------------------------------------------------------------------------------------------------------------------------------------------------------------------------------------------------------------------------------------------------------------------------------------------------------------------------------------|
| <b>(E)-2-cyano-3-phenylacrylamide (3a)</b>                                          |                                                                                                                                                                                                                                                                                                                                                                                                                                                                                                                                                                                                                   |
| 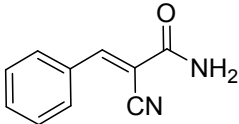   | <p><b>R<sub>f</sub></b>: 0.42 (Pet. Ether/EtOAc = 60/40); <b>Yield</b>: 136 mg, 84%;<br/>           White solid; <b>mp</b>: 130 °C; <b><sup>1</sup>H NMR</b> (200 MHz, DMSO-<i>d</i><sub>6</sub>) δ ppm: 7.46 (br. s, 3H) 7.78 - 7.95 (m, 2H) 8.06-8.22 (m, 1H); <b><sup>13</sup>C NMR</b> (50 MHz, DMSO-<i>d</i><sub>6</sub>) δ ppm: 103.1 117.0, 129.2, 130.8, 131.6, 133.1, 154.0, 162.1; <b>HRMS</b> (ESI) calculated [M + H]<sup>+</sup> for C<sub>10</sub>H<sub>9</sub>ON<sub>2</sub>: 173.0709; found: 173.0706.</p>                                                                                       |
| <b>(E)-2-cyano-3-(naphthalen-1-yl)acrylamide (3b)</b>                               |                                                                                                                                                                                                                                                                                                                                                                                                                                                                                                                                                                                                                   |
|  | <p><b>R<sub>f</sub></b>: 0.38 (Pet. ether / EtOAc = 65/35); <b>Yield</b>: 125 mg, 88%; White solid; <b>mp</b>: 168 °C; <b><sup>1</sup>H NMR</b> (500 MHz, DMSO-<i>d</i><sub>6</sub>) δ ppm: 7.66 (br. s., 3H), 7.86 (br. s., 1H), 8.05 (br. s., 2H), 8.15 (br. s., 2H), 8.20 (br. s., 1H), 8.87 (br. s., 1H); <b><sup>13</sup>C NMR</b> (101 MHz, DMSO-<i>d</i><sub>6</sub>) δ ppm: 111.4, 116.4, 123.9, 125.6, 127.1, 127.4, 127.7, 129.1, 129.6, 131, 132.1, 133.2, 148.7, 162.9; <b>HRMS</b> (ESI) calculated [M+H]<sup>+</sup> for C<sub>14</sub>H<sub>11</sub>ON<sub>2</sub>: 223.0866; found: 223.0860.</p> |
| <b>(E)-2-cyano-3-(2,4-dichlorophenyl)acrylamide (3c)</b>                            |                                                                                                                                                                                                                                                                                                                                                                                                                                                                                                                                                                                                                   |
|  | <p><b>R<sub>f</sub></b>: 0.43 (Pet. ether /EtOAc = 60/40); <b>Yield</b>: 113 mg, 90%;<br/>           White solid; <b>mp</b>: 125 °C; <b><sup>1</sup>H NMR</b> (200 MHz, DMSO-<i>d</i><sub>6</sub>) δ ppm : 7.5 (dd, <i>J</i>= 8.5, 2.0 Hz, 1H), 7.6 (d, <i>J</i>=2.1 Hz, 1H), 7.8 (br. s., 2H), 8.0 (d, <i>J</i>= 8.7 Hz, 1H), 8.3 (s, 1H); <b><sup>13</sup>C NMR</b> (50 MHz, DMSO-<i>d</i><sub>6</sub>) δ ppm : 110.4, 115.2,</p>                                                                                                                                                                               |

|                                                                                     |                                                                                                                                                                                                                                                                                                                                                                                                                                                                                                                       |
|-------------------------------------------------------------------------------------|-----------------------------------------------------------------------------------------------------------------------------------------------------------------------------------------------------------------------------------------------------------------------------------------------------------------------------------------------------------------------------------------------------------------------------------------------------------------------------------------------------------------------|
|                                                                                     | 127.7 , 129.1, 129.5 , 130.3, 135.5, 137.2, 145.7, 161.2;<br><b>HRMS</b> (ESI) calculated $[M+H]^+$ for $C_{10}H_7ON_2Cl_2$ :<br>240.9930; found: 240.9928.                                                                                                                                                                                                                                                                                                                                                           |
| <b>(E)-2-cyano-3-(2,6-dichlorophenyl)acrylamide (3d)</b>                            |                                                                                                                                                                                                                                                                                                                                                                                                                                                                                                                       |
| 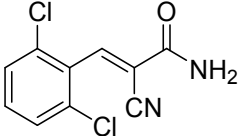   | <b>R<sub>f</sub></b> : 0.42 (Pet. ether / EtOAc = 55/45); <b>Yield</b> : 122 mg, 83%;<br>White solid; <b>mp</b> : 125-128 °C; <b><sup>1</sup>H NMR</b> (200 MHz, DMSO- <i>d</i> <sub>6</sub> )δ ppm : 7.4-7.5 (m, 4H), 7.8 (br. s., 1H), 7.9 (br. s., 1H), 8.1 (s, 1H); <b><sup>13</sup>C NMR</b> (50 MHz, CDCl <sub>3</sub> ) δ ppm : 163.1, 161.8, 150.9, 132.7, 122.8, 117.2, 116.0, 100.5, 95.6; <b>HRMS</b> (ESI) calculated $[M+H]^+$ for $C_{10}H_7ON_2Cl_2$ : 240.9930; found: 240.9928.                      |
| <b>(E)-2-cyano-3-(p-tolyl)acrylamide (3e)</b>                                       |                                                                                                                                                                                                                                                                                                                                                                                                                                                                                                                       |
|  | <b>R<sub>f</sub></b> : 0.41 (Pet. ether /EtOAc = 70/30); <b>Yield</b> : 129 mg, 83%;<br>White solid; <b>mp</b> : 136 °C; <b><sup>1</sup>H NMR</b> (200 MHz, CDCl <sub>3</sub> )δ ppm: 2.4 (s, 3H), 6.4 (br.s., 2H), 7.3 (d, <i>J</i> = 8.2 Hz, 2H), 7.9 (d, <i>J</i> = 8.2 Hz, 2H), 8.3(s,1H); <b><sup>13</sup>C NMR</b> (50 MHz, CDCl <sub>3</sub> )δ ppm: 21.2,105.3, 116.7, 129.2, 129.9, 130.1, 143.0, 150.5, 162.9; <b>HRMS</b> (ESI) calculated $[M + H]^+$ for $C_{11}H_{11}ON_2$ : 187.0866; found: 187.0862. |
| <b>(E)-2-cyano-3-(4-(methylthio)phenyl)acrylamide (3f)</b>                          |                                                                                                                                                                                                                                                                                                                                                                                                                                                                                                                       |
|  | <b>R<sub>f</sub></b> : 0.32 (Pet. ether /EtOAc = 60/40); <b>Yield</b> : 108 mg, 75%;<br>White solid; <b>mp</b> : 153 °C; <b><sup>1</sup>H NMR</b> (200 MHz, CDCl <sub>3</sub> )δ ppm: 2.55 (s, 3H), 6.17 (br. s., 1H), 6.33 (br. s., 1H), 7.31 (d, <i>J</i> = 8.6 Hz, 2H), 7.88 (d, <i>J</i> = 8.6 Hz, 2H), 8.27 (s, 1H);                                                                                                                                                                                             |



|                                                                                     |                                                                                                                                                                                                                                                                                                                                                                                                                                                                                                                                                                                                                                                                                                                     |
|-------------------------------------------------------------------------------------|---------------------------------------------------------------------------------------------------------------------------------------------------------------------------------------------------------------------------------------------------------------------------------------------------------------------------------------------------------------------------------------------------------------------------------------------------------------------------------------------------------------------------------------------------------------------------------------------------------------------------------------------------------------------------------------------------------------------|
|                                                                                     | <p><math>^{13}\text{C}</math> NMR (50 MHz, DMSO-<math>d_6</math>) <math>\delta</math> ppm: 13.4, 102.2, 116.0, 124.3, 126.9, 129.7, 144.6, 150.2, 161.6; <b>HRMS</b> (ESI) calculated <math>[\text{M}+\text{H}]^+</math> for <math>\text{C}_{11}\text{H}_{11}\text{ON}_2\text{S}</math>: 219.0587; found: 219.0581.</p>                                                                                                                                                                                                                                                                                                                                                                                             |
| <b>(E)-2-cyano-3-(4-isopropylphenyl)acrylamide (3g)</b>                             |                                                                                                                                                                                                                                                                                                                                                                                                                                                                                                                                                                                                                                                                                                                     |
| 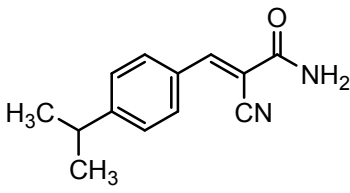   | <p><b>R<sub>f</sub></b>: 0.41 (Pet. ether /EtOAc = 65/35); <b>Yield</b>: 126 mg, 87%; Yellow solid; <b>mp</b>: 136-138 °C; <math>^1\text{H}</math> NMR (500 MHz, <math>\text{CDCl}_3</math>) <math>\delta</math> ppm : 0.81 (d, <math>J</math>= 6.71 Hz, 7H) 5.67 (br. s., 1H) 5.88 (br. s., 1H) 6.88 (m, <math>J</math>= 8.24 Hz, 2H) 7.41 (m, <math>J</math>= 8.24 Hz, 2H) 7.81 (s, 1H); <math>^{13}\text{C}</math> NMR (125 MHz, <math>\text{CDCl}_3</math>) <math>\delta</math> ppm: 23.7, 34.5, 101.8, 117.3, 127.5, 129.4, 131.2, 153.9, 154.9, 162.2; <b>HRMS</b> (ESI) calculated <math>[\text{M}+\text{H}]^+</math> for <math>\text{C}_{13}\text{H}_{15}\text{ON}_2</math>: 215.1179; found: 215.1177.</p> |
| <b>(E)-2-cyano-3-(4-methoxyphenyl)acrylamide (3h)</b>                               |                                                                                                                                                                                                                                                                                                                                                                                                                                                                                                                                                                                                                                                                                                                     |
|  | <p><b>R<sub>f</sub></b>: 0.35 (Pet. ether /EtOAc = 60/40); <b>Yield</b>: 99 mg, 64%; White solid; <b>mp</b>: 220°C; <math>^1\text{H}</math> NMR (400 MHz, DMSO-<math>d_6</math>) <math>\delta</math> ppm: 3.85 (br. s., 3H) 7.13 (d, <math>J</math> = 7.32 Hz, 2H) 7.67 (br. s., 1H) 7.80 (br. s., 1H) 7.96 (d, <math>J</math> = 7.32 Hz, 2H) 8.11 (br. s., 1H); <math>^{13}\text{C}</math> NMR (101 MHz, DMSO-<math>d_6</math>) <math>\delta</math> ppm: 55.6, 102.9, 114.83, 117.09, 124, 132.47, 150.1, 162.59, 163.13; <b>HRMS</b> (ESI) calculated <math>[\text{M}+\text{H}]^+</math> for <math>\text{C}_{11}\text{H}_{11}\text{O}_2\text{N}_2</math>: 203.0815; found: 203.0814.</p>                          |
| <b>(E)-2-cyano-3-(4-hydroxyphenyl)acrylamide (3i)</b>                               |                                                                                                                                                                                                                                                                                                                                                                                                                                                                                                                                                                                                                                                                                                                     |
|                                                                                     | <p><b>R<sub>f</sub></b>: 0.50 (Pet. ether /EtOAc = 70/30); <b>Yield</b>: 99 mg, 64%;</p>                                                                                                                                                                                                                                                                                                                                                                                                                                                                                                                                                                                                                            |

|                                                                                     |                                                                                                                                                                                                                                                                                                                                                                                                                                                                                                                                                                                                                                                    |
|-------------------------------------------------------------------------------------|----------------------------------------------------------------------------------------------------------------------------------------------------------------------------------------------------------------------------------------------------------------------------------------------------------------------------------------------------------------------------------------------------------------------------------------------------------------------------------------------------------------------------------------------------------------------------------------------------------------------------------------------------|
| 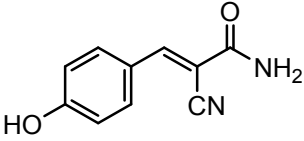   | <p>White solid; <b>mp</b>: 242-243 °C; <b><sup>1</sup>H NMR</b> (200 MHz, DMSO-<i>d</i><sub>6</sub>) δ ppm : 6.85 (m, <i>J</i>= 8.7 Hz, 2H) 7.37 (br. s., 2 H) 7.79 (m, <i>J</i>= 8.7 Hz, 2H) 8.00 (s, 1H) 10.26 (s, 1H); <b><sup>13</sup>C NMR</b> (50 MHz, CDCl<sub>3</sub>)δ ppm : 100.5, 116.0, 117.2, 122.8, 132.7, 150.9, 161.8, 163.1; <b>HRMS</b> (ESI) calculated [M+H]<sup>+</sup> for C<sub>10</sub>H<sub>9</sub>O<sub>2</sub>N<sub>2</sub>: 189.0659; found: 189.0658.</p>                                                                                                                                                             |
| <p><b>(E)-2-cyano-3-(2,5-dimethoxyphenyl)acrylamide (3j)</b></p>                    |                                                                                                                                                                                                                                                                                                                                                                                                                                                                                                                                                                                                                                                    |
|   | <p><b>R<sub>f</sub></b>: 0.41 (Pet. ether /EtOAc = 60/40); <b>Yield</b>: 108 mg, 76%; Yellow; <b>mp</b>: 165 °C; <b><sup>1</sup>H NMR</b> (200 MHz, DMSO-<i>d</i><sub>6</sub>)δ ppm : 3.7 (s, 3H), 3.7 (s, 3H), 6.5-6.7 (m, 2H), 6.8 (d, <i>J</i>= 9.1 Hz, 1H), 7.0 (dd, <i>J</i>= 9.1, 3.0 Hz, 1H), 7.6 (d, <i>J</i>= 2.9 Hz, 1H), 8.6 (s, 1H); <b><sup>13</sup>C NMR</b> (126 MHz, DMSO-<i>d</i><sub>6</sub>) δ ppm: 55.5, 56.3, 106.6, 112.8, 113.1, 116.6, 119.8, 120.8, 145.4, 152.7, 152.8, 162.6; <b>HRMS</b> (ESI) calculated [M+H]<sup>+</sup> for C<sub>12</sub>H<sub>13</sub>O<sub>3</sub>N<sub>2</sub>: 233.0921; found: 233.0915.</p> |
| <p><b>(E)-2-cyano-3-(3,4-dimethoxyphenyl)acrylamide (3k)</b></p>                    |                                                                                                                                                                                                                                                                                                                                                                                                                                                                                                                                                                                                                                                    |
|  | <p><b>R<sub>f</sub></b>: 0.38 (Pet. ether /EtOAc = 65/35); <b>Yield</b>: 103 mg, 74%; White solid; <b>mp</b>: 195-196 °C; <b><sup>1</sup>H NMR</b> (200 MHz, DMSO-<i>d</i><sub>6</sub>) δ ppm 3.81 (3 H, s), 3.86 (3 H, s), 7.14 (1 H, d, <i>J</i>=8.6 Hz), 7.56 (1 H, dd, <i>J</i>=8.5, 1.9 Hz), 7.66 (1 H, s), 7.68 - 7.89 (2 H, m), 8.06 - 8.19 (1 H, m); <b><sup>13</sup>C NMR</b> (50 MHz, DMSO-<i>d</i><sub>6</sub>) δ ppm :55.4, 55.80, 102.8, 111.8, 112.2, 117.2, 124.4, 125.5, 148.7, 150.6, 152.5, 163.1; <b>HRMS</b> (ESI) calculated [M+H]<sup>+</sup> for C<sub>12</sub>H<sub>13</sub>O<sub>3</sub>N<sub>2</sub>: 233.0921;</p>      |

|                                                                                     |                                                                                                                                                                                                                                                                                                                                                                                                                                                                                                                                                                                                                                                               |
|-------------------------------------------------------------------------------------|---------------------------------------------------------------------------------------------------------------------------------------------------------------------------------------------------------------------------------------------------------------------------------------------------------------------------------------------------------------------------------------------------------------------------------------------------------------------------------------------------------------------------------------------------------------------------------------------------------------------------------------------------------------|
|                                                                                     | found: 233.0915.                                                                                                                                                                                                                                                                                                                                                                                                                                                                                                                                                                                                                                              |
| <b>(E)-2-cyano-3-(2,4-dimethoxyphenyl)acrylamide (3l)</b>                           |                                                                                                                                                                                                                                                                                                                                                                                                                                                                                                                                                                                                                                                               |
| 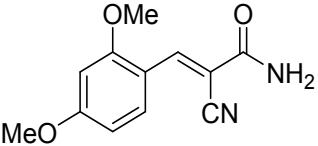   | <p><b>R<sub>f</sub></b>: 0.39 (Pet. ether /EtOAc = 60/40); <b>Yield</b>: 110 mg, 79%;</p> <p>White solid; <b>mp</b> : 168-169 °C; <b><sup>1</sup>H NMR</b> (200 MHz, DMSO-<i>d</i><sub>6</sub>) δ ppm : 3.9 (s, 3H) 3.8 (s, 3H) 7.0 (d, <i>J</i>= 8.34 Hz, 1H) 7.2-7.5 (m, 3H) 7.6 (d, <i>J</i>= 2.02 Hz, 1H) 8.0 (s, 1 H); <b><sup>13</sup>C NMR</b> (50 MHz, DMSO-<i>d</i><sub>6</sub>) δ ppm : 55.3, 55.5, 95.5, 101.9, 111.0, 111.4, 117.0, 124.4, 126.0, 148.6, 150.9, 152.4, 162.6; <b>HRMS</b> (ESI) calculated [M +H]<sup>+</sup> for C<sub>12</sub>H<sub>13</sub>O<sub>3</sub>N<sub>2</sub>: 233.0921; found: 233.0915.</p>                          |
| <b>(E)-2-cyano-3-(3,4,5-trimethoxyphenyl)acrylamide (3m)</b>                        |                                                                                                                                                                                                                                                                                                                                                                                                                                                                                                                                                                                                                                                               |
|  | <p><b>R<sub>f</sub></b>: 0.35 (Pet. ether /EtOAc = 70/30); <b>Yield</b>: 113 mg, 85%;</p> <p>White solid; <b>mp</b> : 113-114 °C; <b><sup>1</sup>H NMR</b> (400 MHz, DMSO-<i>d</i><sub>6</sub>) δ ppm : 3.77 (s, 3H) 3.88 (s, 3H) 3.89 (s, 3H) 7.03 (d, <i>J</i>= 9.05 Hz, 1H) 7.69 (br. s., 1H) 7.85 (br. s 1H) 7.91 (d, <i>J</i>= 9.05 Hz, 1H) 8.25 (s, 1H); <b><sup>13</sup>C NMR</b> (101 MHz, CDCl<sub>3</sub>) δ ppm: 56.3, 60.6, 62.0, 104.4, 108.4, 117.0, 118.3, 123.7, 141.5, 144.9, 153.6, 157.4, 163.0; <b>HRMS</b> (ESI) calculated [M+H]<sup>+</sup> for C<sub>13</sub>H<sub>15</sub>O<sub>4</sub>N<sub>2</sub>: 263.1026; found: 263.1024.</p> |
| <b>(E)-3-(2-bromo-3,4,5-trimethoxyphenyl)-2-cyanoacrylamide (3n)</b>                |                                                                                                                                                                                                                                                                                                                                                                                                                                                                                                                                                                                                                                                               |
|                                                                                     | <p><b>R<sub>f</sub></b>: 0.39 (Pet. ether /EtOAc =60/40); <b>Yield</b>: 111 mg, 89%;</p> <p>Pale Yellow; <b>mp</b>: 221 °C; <b><sup>1</sup>H NMR</b>(500 MHz, DMSO-<i>d</i><sub>6</sub>) δ ppm: 3.82 (br. s., 3H) 3.86 (br. s., 3H) 3.88 (br. s., 3H)</p>                                                                                                                                                                                                                                                                                                                                                                                                     |

|                                                                                     |                                                                                                                                                                                                                                                                                                                                                                                                                                                                                                                                                                              |
|-------------------------------------------------------------------------------------|------------------------------------------------------------------------------------------------------------------------------------------------------------------------------------------------------------------------------------------------------------------------------------------------------------------------------------------------------------------------------------------------------------------------------------------------------------------------------------------------------------------------------------------------------------------------------|
| 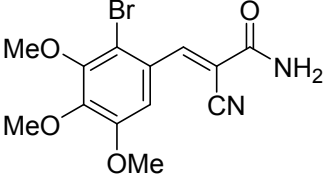   | <p>7.55 (br. s., 1H) 7.87 (br. s., 1H) 8.00 (br. s., 1 H) 8.29 (br. s., 1H); <sup>13</sup>C NMR(126 MHz, DMSO-<i>d</i><sub>6</sub>) δ(s) 56.2, 60.9, 109.1,109.6, 111.8, 115.8,127.1, 145.3, 149.3,150.5, 152.3,161.8; <b>HRMS</b> (ESI) calculated [M +H]<sup>+</sup> for C<sub>13</sub>H<sub>14</sub>O<sub>4</sub>N<sub>2</sub>Br: 341.0131; found: 341.0124.</p>                                                                                                                                                                                                          |
| <p><b>(E)-3-(benzo[d][1,3]dioxol-5-yl)-2-cyanoacrylamide(3o)</b></p>                |                                                                                                                                                                                                                                                                                                                                                                                                                                                                                                                                                                              |
|    | <p><b>R<sub>f</sub></b>: 0.38 (Pet. ether /EtOAc = 65/35); <b>Yield</b>: 130 mg, 90%; white solid; <b>mp</b>: 204-206 °C; <b><sup>1</sup>H NMR</b> (200 MHz, DMSO-<i>d</i><sub>6</sub>) δ ppm : 6.1 (s, 2H), 6.9 (d, <i>J</i>= 8.2 Hz, 1H), 7.2-7.5 (m, 3H), 7.6 (s, 1H), 8.0 (s, 1H); <sup>13</sup>C NMR (50 MHz, DMSO-<i>d</i><sub>6</sub>)δ ppm : 101.8, 102.4, 107.7, 108.4, 116.6, 125.8, 128.1, 148.0, 150.4 , 150.9 , 162.4; <b>HRMS</b> (ESI) calculated [M+H]<sup>+</sup> for C<sub>11</sub>H<sub>9</sub>O<sub>3</sub>N<sub>2</sub>: 217.0608; found: 217.0606.</p> |
| <p><b>(E)-2-cyano-3-(o-tolyl)acrylamide (3p)</b></p>                                |                                                                                                                                                                                                                                                                                                                                                                                                                                                                                                                                                                              |
|  | <p><b>R<sub>f</sub></b>: 0.42 (Pet. ether /EtOAc = 65/35); <b>Yield</b>: 125 mg, 81%; White solid; <b>mp</b>: 125-127 °C; <b><sup>1</sup>H NMR</b> (400 MHz, CDCl<sub>3</sub>)δ ppm : 2.48 (s, 3H) 6.35 (br. s., 1H) 6.41 (br. s., 1H) 7.27-7.47 (m, 4H) 8.07 (d, <i>J</i>= 7.78 Hz, 1H) 8.63 (s, 1H); <sup>13</sup>C NMR (101 MHz, CDCl<sub>3</sub>)δ ppm : 20.0, 104.8, 116.8, 126.7, 128.3, 130.9, 131.1, 132.6, 139.8, 152.1, 161.9; <b>HRMS</b> (ESI) calculated [M+H]<sup>+</sup> for C<sub>11</sub>H<sub>11</sub>ON<sub>2</sub>: 187.0866; found: 187.0862.</p>       |
| <p><b>(E)-2-cyano-3-(2-methoxyphenyl)acrylamide (3q)</b></p>                        |                                                                                                                                                                                                                                                                                                                                                                                                                                                                                                                                                                              |

|                                                                                     |                                                                                                                                                                                                                                                                                                                                                                                                                                                                                                                                                                                                                                                       |
|-------------------------------------------------------------------------------------|-------------------------------------------------------------------------------------------------------------------------------------------------------------------------------------------------------------------------------------------------------------------------------------------------------------------------------------------------------------------------------------------------------------------------------------------------------------------------------------------------------------------------------------------------------------------------------------------------------------------------------------------------------|
| 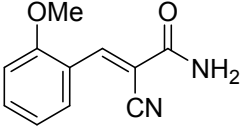   | <p><b>R<sub>f</sub></b>: 0.35 (Pet. ether /EtOAc = 60/40); <b>Yield</b>: 111 mg, 75%;<br/> White solid; <b>mp</b> : 146-148 °C; <b><sup>1</sup>H NMR</b> (200 MHz, DMSO-<i>d</i><sub>6</sub>)δ ppm : 3.85 (s, 3H), 6.97-7.22 (m, 1H), 7.32-7.50 (m, 3H), 7.53 (br. s., 2H), 8.16 (s, 1H); <b><sup>13</sup>C NMR</b> (50 MHz, DMSO-<i>d</i><sub>6</sub>)δ ppm : 54.8, 105.7, 114.1, 116.2, 118.1, 122.7, 129.7, 132.8, 150.9, 159.3, 162.0; <b>HRMS</b> (ESI) calculated [M+H]<sup>+</sup> for C<sub>11</sub>H<sub>11</sub>O<sub>2</sub>N<sub>2</sub>: 203.0815; found: 203.0814.</p>                                                                  |
| <b>(E)-2-cyano-3-(4-phenoxyphenyl)acrylamide (3r)</b>                               |                                                                                                                                                                                                                                                                                                                                                                                                                                                                                                                                                                                                                                                       |
|  | <p><b>R<sub>f</sub></b>: 0.44 (Pet. ether /EtOAc = 60/40); <b>Yield</b>: 110 mg, 76%;<br/> White solid; <b>mp</b> : 112-114 °C; <b><sup>1</sup>H NMR</b> (200 MHz, CDCl<sub>3</sub>)δ ppm : 6.40 (br. s., 1H) 6.56 (br. s., 1H) 7.01-7.09 (m, 2H) 7.13-7.26 (m, 2H) 7.34 -7.52 (m, 4H) 7.69 (d, <i>J</i>= 7.83 Hz, 1H) 8.26 (s, 1H); <b><sup>13</sup>C NMR</b> (50 MHz, DMSO-<i>d</i><sub>6</sub>)δ ppm : 161.6, 150.6, 133.1, 132.3, 131.2, 128.6, 127.2, 127.1, 126.4, 124.9, 122.8, 118.5, 116.4, 107.2; <b>HRMS</b> (ESI) calculated [M+H]<sup>+</sup> for C<sub>16</sub>H<sub>13</sub>O<sub>2</sub>N<sub>2</sub>: 265.0972; found: 265.0969.</p> |
| <b>(E)-3-(3-bromophenyl)-2-cyanoacrylamide (3s)</b>                                 |                                                                                                                                                                                                                                                                                                                                                                                                                                                                                                                                                                                                                                                       |
|  | <p><b>R<sub>f</sub></b>: 0.4 (Pet. ether /EtOAc = 60/40); <b>Yield</b>: 122 mg, 90%;<br/> White solid; <b>mp</b>: 131-134 °C; <b><sup>1</sup>H NMR</b> (200 MHz, DMSO-<i>d</i><sub>6</sub>)δ ppm : 7.4-7.5 (m, 1H), 7.6-7.8 (m, 3H), 7.9 (d, <i>J</i>= 7.8 Hz, 1H), 8.0 (s, 1H), 8.1 (s, 1H); <b><sup>13</sup>C NMR</b> (50 MHz, DMSO-<i>d</i><sub>6</sub>) δ ppm : 107.9, 115.8, 122.2, 128.6,</p>                                                                                                                                                                                                                                                   |

|                                                                                     |                                                                                                                                                                                                                                                                                                                                                                                                                                                                                                                                                        |
|-------------------------------------------------------------------------------------|--------------------------------------------------------------------------------------------------------------------------------------------------------------------------------------------------------------------------------------------------------------------------------------------------------------------------------------------------------------------------------------------------------------------------------------------------------------------------------------------------------------------------------------------------------|
|                                                                                     | 130.8, 132.2, 134.0, 134.4, 148.8, 162.0; <b>HRMS</b> (ESI) calculated $[M+H]^+$ for $C_{10}H_8ON_2Br$ : 250.9815; found: 250.9808.                                                                                                                                                                                                                                                                                                                                                                                                                    |
| <b>(E)-2-cyano-3-(3-nitrophenyl)acrylamide (3t)</b>                                 |                                                                                                                                                                                                                                                                                                                                                                                                                                                                                                                                                        |
| 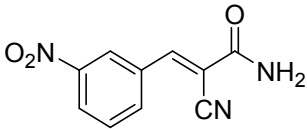   | <b>R<sub>f</sub></b> : 0.34 (Pet. ether /EtOAc = 65/35); <b>Yield</b> : 137 mg, 84%;<br>Brown solid; <b>mp</b> : 210-211 °C; <b><sup>1</sup>H NMR</b> (200 MHz, DMSO- <i>d</i> <sub>6</sub> ) δ ppm : 8.2 (s, 1H), 7.7-7.9 (m, 4H), 7.2 (t, <i>J</i> =8.0 Hz, 1H), 6.8 (s, 1H), 6.9 (s, 1H); <b><sup>13</sup>C NMR</b> (50 MHz, DMSO- <i>d</i> <sub>6</sub> ) δ ppm : 160.8, 148.2, 147.4, 134.7, 132.6, 129.6, 125.3, 123.7, 114.9, 107.8; <b>HRMS</b> (ESI) calculated $[M+H]^+$ for $C_{10}H_8O_3N_3$ : 218.0560; found: 218.055                    |
| <b>(E)-3-(4-bromophenyl)-2-cyanoacrylamide(3u)</b>                                  |                                                                                                                                                                                                                                                                                                                                                                                                                                                                                                                                                        |
|  | <b>R<sub>f</sub></b> : 0.41 (Pet. ether /EtOAc = 65/35); <b>Yield</b> : 121 mg, 89%;<br>White Solid; <b>mp</b> : 198 °C ; <b><sup>1</sup>H NMR</b> (500 MHz, DMSO- <i>d</i> <sub>6</sub> ) δ ppm : 7.72 (d, <i>J</i> =8.01 Hz, 2 H) 7.77 (br. s., 1 H) 7.82 (d, <i>J</i> =8.01 Hz, 2 H) 7.93 (br. s., 1 H) 8.11 (s, 1 H); <b><sup>13</sup>C NMR</b> (126 MHz, DMSO- <i>d</i> <sub>6</sub> ) δ ppm : 107.51, 116.4, 126.2, 131.2, 131.9, 132.5, 149.7, 162.8; <b>HRMS</b> (ESI) calculated $[M+H]^+$ for $C_{10}H_8ON_2Br$ : 250.9815; found: 250.9808. |
| <b>(E)-2-cyano-3-(4-cyanophenyl)acrylamide (3v)</b>                                 |                                                                                                                                                                                                                                                                                                                                                                                                                                                                                                                                                        |
|  | <b>R<sub>f</sub></b> : 0.35 (Pet. ether /EtOAc = 60/40); <b>Yield</b> : 126 mg, 86%;<br>White solid; <b>mp</b> : 146-148 °C; <b><sup>1</sup>H NMR</b> (200 MHz, DMSO- <i>d</i> <sub>6</sub> ) δ ppm : 7.44 (s, 1H), 7.36 (s, 1H), 7.68-7.85 (m, 2H), 7.96 (d, <i>J</i> = 8.5 Hz, 2H), 8.19 (s, 1H); <b><sup>13</sup>C NMR</b>                                                                                                                                                                                                                          |

|                                                                                     |                                                                                                                                                                                                                                                                                                                                                                                                                                                                                                                                                                                                                         |
|-------------------------------------------------------------------------------------|-------------------------------------------------------------------------------------------------------------------------------------------------------------------------------------------------------------------------------------------------------------------------------------------------------------------------------------------------------------------------------------------------------------------------------------------------------------------------------------------------------------------------------------------------------------------------------------------------------------------------|
|                                                                                     | (50 MHz, CDCl <sub>3</sub> ) $\delta$ ppm : 110.0, 113.8, 115.8, 118.2, 130.3, 133.0, 136.3, 148.7, 162; <b>HRMS</b> (ESI) calculated [M+H] <sup>+</sup> for C <sub>11</sub> H <sub>8</sub> ON <sub>3</sub> : 198.0662; found: 198.0658.                                                                                                                                                                                                                                                                                                                                                                                |
| <b>(E)-2-cyano-3-(4-nitrophenyl)acrylamide (3w)</b>                                 |                                                                                                                                                                                                                                                                                                                                                                                                                                                                                                                                                                                                                         |
| 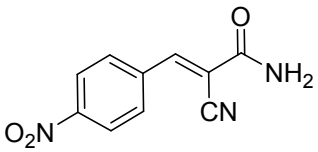   | <b>R<sub>f</sub></b> : 0.41 (Pet. ether /EtOAc = 60/40); <b>Yield</b> : 131 mg, 91%; Yellow solid; <b>mp</b> : 198-200 °C; <b><sup>1</sup>H NMR</b> (400 MHz, DMSO- <i>d</i> <sub>6</sub> ) $\delta$ ppm : 7.91 (br. s., 1H) 8.06 (br. s., 1H) 8.12 (m, <i>J</i> = 8.80 Hz, 2H) 8.29 (s, 1H) 8.38 (m, <i>J</i> =8.80 Hz, 2H); <b><sup>13</sup>C NMR</b> (101 MHz, CDCl <sub>3</sub> ) $\delta$ ppm : 110.7, 115.8, 124.2, 131.0, 138.1, 148.3, 148.8, 162.1; <b>HRMS</b> (ESI) calculated [M+H] <sup>+</sup> for C <sub>10</sub> H <sub>8</sub> O <sub>3</sub> N <sub>3</sub> : 218.0560; found: 218.0556.              |
| <b>(E)-2-cyano-3-(4-(trifluoromethyl)phenyl)acrylamide (3x)</b>                     |                                                                                                                                                                                                                                                                                                                                                                                                                                                                                                                                                                                                                         |
|  | <b>R<sub>f</sub></b> : 0.39 (Pet. ether /EtOAc = 70/30); <b>Yield</b> : 127, 92%; Light Brown; <b>mp</b> : 172 °C; <b><sup>1</sup>H NMR</b> (200 MHz, CDCl <sub>3</sub> ) $\delta$ ppm : 6.53 (br. s., 2H), 7.76 (d, <i>J</i> = 8.3 Hz, 3H), 8.04 (d, <i>J</i> = 8.2 Hz, 2H), 8.38 (s, 1H); <b><sup>13</sup>C NMR</b> (50 MHz, CDCl <sub>3</sub> ) $\delta$ ppm : 106.0, 116.2, 120.6, 126.1 - 126.3 (q, <i>J</i> =3.66 and 7.32 Hz), 130.7, 134.3, 134.6, 152.1, 161.5; <b>HRMS</b> (ESI) calculated [M+H] <sup>+</sup> for C <sub>11</sub> H <sub>8</sub> ON <sub>2</sub> F <sub>3</sub> : 241.0583; found: 241.0577. |
| <b>(E)-3-(2-chlorophenyl)-2-cyanoacrylamide (3y)</b>                                |                                                                                                                                                                                                                                                                                                                                                                                                                                                                                                                                                                                                                         |
|                                                                                     | <b>R<sub>f</sub></b> : 0.41 (Pet. ether /EtOAc = 65/35); <b>Yield</b> : 133 mg, 91%; off white solid; <b>mp</b> : 143 °C ; <b><sup>1</sup>H NMR</b> (500 MHz, METHANOL- <i>d</i> <sub>4</sub> ) $\delta$ ppm 7.4 (1 H, br. s.), 7.5 - 7.6 (3 H,                                                                                                                                                                                                                                                                                                                                                                         |

|                                                                                     |                                                                                                                                                                                                                                                                                                                                                                                                                                                                                                                                                                                                                                                                            |
|-------------------------------------------------------------------------------------|----------------------------------------------------------------------------------------------------------------------------------------------------------------------------------------------------------------------------------------------------------------------------------------------------------------------------------------------------------------------------------------------------------------------------------------------------------------------------------------------------------------------------------------------------------------------------------------------------------------------------------------------------------------------------|
| 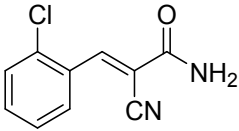   | <p>m), 7.8 (1 H, d, <math>J=7.2</math> Hz), 8.1 (1 H, d, <math>J=7.6</math> Hz), 8.5 (1 H, s); <math>^{13}\text{C}</math> NMR (126 MHz, <i>METHANOL-d</i><sub>4</sub>) <math>\delta</math> ppm; 100.8, 106.9, 119.08, 121.27, 121.8, 124.9, 127.1, 140.07, 154.8, 159.5; <b>HRMS</b> (ESI) calculated <math>[\text{M}+\text{H}]^+</math> for <math>\text{C}_{11}\text{H}_8\text{ON}_3</math>: 198.0662; found: 198.0658.</p>                                                                                                                                                                                                                                               |
| <b>(E)-2-cyano-3-(2-nitrophenyl)acrylamide (3z)</b>                                 |                                                                                                                                                                                                                                                                                                                                                                                                                                                                                                                                                                                                                                                                            |
|    | <p><b>R<sub>f</sub></b>: 0.43 (Pet. ether /EtOAc = 60/40); <b>Yield</b>: 135 mg, 94%; White solid; <b>mp</b>: 168-169 °C; <math>^1\text{H}</math> NMR (200 MHz, <i>DMSO-d</i><sub>6</sub>) <math>\delta</math> ppm 7.5 - 7.9 (2 H, m), 7.9 - 7.9 (2 H, m), 8.0 (1 H, br. s.), 8.3 (1 H, d, <math>J=8.0</math> Hz), 8.7 (1 H, s); <math>^{13}\text{C}</math> NMR (50 MHz, <i>DMSO-d</i><sub>6</sub>) <math>\delta</math> ppm: 108.7, 114.7, 125.1, 128.4, 130.6, 132.3, 134.7, 147.2, 154.1, 162.4; <b>HRMS</b> (ESI) calculated <math>[\text{M}+\text{H}]^+</math> for <math>\text{C}_{10}\text{H}_8\text{O}_3\text{N}_3</math>: 218.0560; found: 218.0555.</p>            |
| <b>(E)-3-(2-bromophenyl)-2-cyanoacrylamide (3za)</b>                                |                                                                                                                                                                                                                                                                                                                                                                                                                                                                                                                                                                                                                                                                            |
|  | <p><b>R<sub>f</sub></b>: 0.4 (Pet. ether /EtOAc = 65/35); <b>Yield</b>: 126 mg, 93%; White solid; <b>mp</b>: 178 °C; <math>^1\text{H}</math> NMR (200 MHz, <math>\text{CDCl}_3</math>) <math>\delta</math> ppm : 6.17 (br. s., 1H), 6.37 (br. s., 1H), 7.36 - 7.52 (m, 3H), 7.67-7.75 (m, 1H), 8.09 (dd, <math>J= 7.6, 1.8</math> Hz, 1H); <math>^{13}\text{C}</math> NMR (50 MHz, <i>DMSO-d</i><sub>6</sub>) <math>\delta</math> ppm : 108.2, 114.5, 124.2, 126.7, 128.5, 131.0, 131.8, 132.1, 149.4, 160.4; <b>HRMS</b> (ESI) calculated <math>[\text{M}+\text{H}]^+</math> for <math>\text{C}_{10}\text{H}_8\text{ON}_2\text{Br}</math>: 250.9815; found: 250.9808.</p> |
| <b>(E)-2-cyano-3-(furan-2-yl)acrylamide (5a)</b>                                    |                                                                                                                                                                                                                                                                                                                                                                                                                                                                                                                                                                                                                                                                            |



|                                                                                     |                                                                                                                                                                                                                                                                                                                                                                                                                                                                                                                                                                                |
|-------------------------------------------------------------------------------------|--------------------------------------------------------------------------------------------------------------------------------------------------------------------------------------------------------------------------------------------------------------------------------------------------------------------------------------------------------------------------------------------------------------------------------------------------------------------------------------------------------------------------------------------------------------------------------|
| 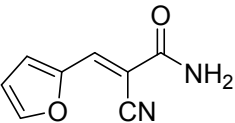   | <p><b>R<sub>f</sub></b>: 0.35 (Pet. ether /EtOAc = 60/40); <b>Yield</b>: 150 mg, 89%; Yellow solid; <b>mp</b>: 148-150 °C; <b><sup>1</sup>H NMR</b> (500 MHz, CDCl<sub>3</sub>)δ ppm : 6.49-6.55 (m, 1H), 6.60 (br. s., 1H), 6.70 (br. s., 1H), 7.13 (d, <i>J</i>= 3.4 Hz, 1H), 7.63 (s, 1H), 7.93 (s, 1H); <b><sup>13</sup>C NMR</b> (126 MHz, CDCl<sub>3</sub>)δ ppm : 99.8 , 113.2 , 116.4 , 120.5 , 137.4 , 147.3 , 148.8 , 161.8; <b>HRMS</b> (ESI) calculated [M+H]<sup>+</sup> for C<sub>8</sub>H<sub>7</sub>O<sub>2</sub>N<sub>2</sub>: 163.0502; found: 163.0501.</p> |
| <p><b>(E)-2-cyano-3-(thiophen-2-yl)acrylamide (5b)</b></p>                          |                                                                                                                                                                                                                                                                                                                                                                                                                                                                                                                                                                                |
|  | <p><b>R<sub>f</sub></b>: 0.39 (Pet. ether /EtOAc = 70/30); <b>Yield</b>: 138 mg, 87%; Dark Brown; <b>mp</b>: 221 °C; <b><sup>1</sup>H NMR</b> (200 MHz, DMSO-<i>d</i><sub>6</sub>) δ ppm : 7.10-7.32 (m, 1H), 7.59 (br. s., 2H), 7.78 (br. s., 1H), 7.83-8.00 (m, 1H), 8.33 (s, 1H); <b><sup>13</sup>C NMR</b> (50 MHz, DMSO-<i>d</i><sub>6</sub>)δ ppm : 102.1, 116.7, 128.6, 134.9, 135.8, 137.8, 143.6, 162.6; <b>HRMS</b> (ESI) calculated [M+H]<sup>+</sup> for C<sub>8</sub>H<sub>7</sub>ON<sub>2</sub>S: 179.0274; found:179.0270.</p>                                  |
| <p><b>(E)-3-(5-bromothiophen-2-yl)-2-cyanoacrylamide (5c)</b></p>                   |                                                                                                                                                                                                                                                                                                                                                                                                                                                                                                                                                                                |
|  | <p><b>R<sub>f</sub></b>: 0.35 (Pet. ether /EtOAc =65/35); <b>Yield</b>: 117 mg, 94%; Pale Yellow; <b>mp</b>: 168 °C; <b><sup>1</sup>H NMR</b> (200 MHz, CDCl<sub>3</sub>)δ ppm : 6.01 (br. s., 1H), 6.24 (br. s., 1H), 7.19 (d, <i>J</i>= 4.0 Hz, 1H), 7.41-7.60 (m, 1H), 8.31 (s, 1H); <b><sup>13</sup>C NMR</b> (50 MHz, CDCl<sub>3</sub>)δ ppm : 103.02, 117.70., 121.70, 132.34 137.93, 139.16, 143.45, 162.67; <b>HRMS</b> (ESI) calculated [M + H]<sup>+</sup> for C<sub>8</sub>H<sub>6</sub>ON<sub>2</sub>BrS: 258.9358; found: 258.9349.</p>                           |

**(E)-2-cyano-3-(3-methylthiophen-2-yl)acrylamide (5d)**

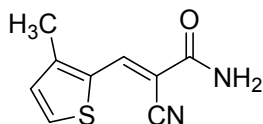

**R<sub>f</sub>**: 0.36 (Pet. ether /EtOAc = 60/40); **Yield**: 128 mg, 84%;  
Dark Brown; **mp**: 155 °C; **<sup>1</sup>H NMR** (200 MHz, CDCl<sub>3</sub>)δ ppm : 2.47 (s, 3H), 5.91-6.46 (m, 2H), 7.02 (d, *J*= 5.2 Hz, 1H), 7.66 (d, *J*= 4.8 Hz, 1H), 8.53 (d, *J*= 0.9 Hz, 1H); **<sup>13</sup>C NMR** (50 MHz, CDCl<sub>3</sub>)δ ppm : 102.6, 116.6, 121.2, 131.9, 137.5, 138.7, 142.9, 162.2; **HRMS** (ESI) calculated [M+H]<sup>+</sup> for C<sub>9</sub>H<sub>9</sub>ON<sub>2</sub>S: 193.0430; found: 193.0426.

**(2E,4E)-2-cyano-5-phenylpenta-2,4-dienamide (7a)**

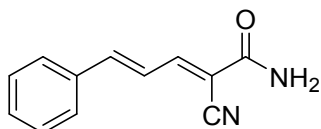

**R<sub>f</sub>**: 0.30 (Pet. ether /EtOAc = 50/50); **Yield**: 136 mg, 91%;  
Orange solid; **mp**: 150-152 °C; **<sup>1</sup>H NMR** (400 MHz, DMSO-*d*<sub>6</sub>)δ ppm : 7.96-8.03 (m, 1H) 7.60-7.62 (m, 2H) 7.40-7.50 (m, 5H) 7.30-7.34 (m, 1H) 7.15-7.21 (m, 1H); **<sup>13</sup>C NMR** (101 MHz, CDCl<sub>3</sub>)δ ppm : 167.4, 156.5, 151.6, 150.9, 139.9, 135.4, 135.1, 133.9, 133.0, 128.1, 120.4, 112.7, 100.8; **HRMS** (ESI) calculated [M+H]<sup>+</sup> for C<sub>12</sub>H<sub>11</sub>ON<sub>2</sub>: 199.0866; found: 199.0865.

**(2E,4E)-2-cyano-5-(2-nitrophenyl)penta-2,4-dienamide (7b)**

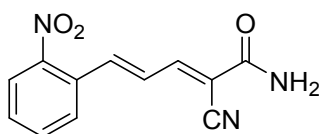

**R<sub>f</sub>**: 0.32 (Pet. ether /EtOAc = 60/40); **Yield**: 116 mg, 85%;  
White solid; **mp**: 207-209 °C; **<sup>1</sup>H NMR** (200 MHz, DMSO-*d*<sub>6</sub>)δ ppm : 7.1 (dd, *J*= 15.1, 11.3 Hz, 1H), 7.2-7.8 (m, 5H), 7.9 (d, *J*= 6.7 Hz, 1H), 8.0 (d, *J*= 8.7 Hz, 2H); **<sup>13</sup>C NMR** (50 MHz, DMSO-*d*<sub>6</sub>)δ ppm : 110.3, 114.7,

|                                                                                     |                                                                                                                                                                                                                                                                                                                                                                                                                                                                                                                                                                                                                                           |
|-------------------------------------------------------------------------------------|-------------------------------------------------------------------------------------------------------------------------------------------------------------------------------------------------------------------------------------------------------------------------------------------------------------------------------------------------------------------------------------------------------------------------------------------------------------------------------------------------------------------------------------------------------------------------------------------------------------------------------------------|
|                                                                                     | 124.5, 127.2, 128.7, 129.9, 130.4, 133.5, 140.2, 147.9, 149.8, 162.0; <b>HRMS</b> (ESI) calculated $[M+H]^+$ for $C_{12}H_{10}O_3N_3$ : 244.0717; found: 244.0717.                                                                                                                                                                                                                                                                                                                                                                                                                                                                        |
| <b>3-(3-phenoxybenzylidene)azetidine-2,4-dione (9a)</b>                             |                                                                                                                                                                                                                                                                                                                                                                                                                                                                                                                                                                                                                                           |
| 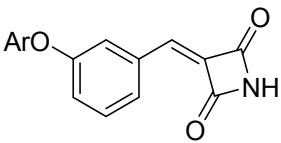   | <b>R<sub>f</sub></b> : 0.32 (Pet. ether / EtOAc = 60/40); <b>Yield</b> : 119 mg, 89%;<br>White solid; <b>mp</b> : 207-209 °C; <b><sup>1</sup>H NMR</b> (500 MHz, <i>CHLOROFORM-d</i> ) $\delta$ ppm: 6.94 - 7.02 (m, 2H), 7.07 - 7.17 (m, 2H), 7.29 - 7.36 (m, 2H), 7.40 (t, $J$ = 8.12 Hz, 1H), 7.46 (s, 1H), 7.68 (d, $J$ = 7.70 Hz, 1H), 8.10 (s, 1 H), 9.41 (br. s., 1 H); <b><sup>13</sup>C NMR</b> (125 MHz, $CDCl_3$ ) $\delta$ ppm : 163.8, 158.0, 156.0, 153.6, 133.2, 130.5, 130.0, 125.0, 124.1, 122.7, 120.2, 119.4, 115.5, 104.9; <b>HRMS</b> (ESI) calculated $[M+H]^+$ for $C_{16}H_{12}NO_3$ : 266.0812, found: 266.0810. |
| <b>3-((2,4-dioxoazetidin-3-ylidene)methyl)benzonitrile (9b)</b>                     |                                                                                                                                                                                                                                                                                                                                                                                                                                                                                                                                                                                                                                           |
|  | <b>R<sub>f</sub></b> : 0.4 (Pet. ether / EtOAc = 50/50); <b>Yield</b> : 122 mg, 81%;<br>White solid; <b>mp</b> : 170°C; <b><sup>1</sup>H NMR</b> (500 MHz, <i>CHLOROFORM-d</i> ) $\delta$ ppm : 7.58 (t, $J$ = 8.01 Hz, 1H), 7.74 (d, $J$ = 7.63 Hz, 1H), 8.08 (s, 1H), 8.12 (s, 1H), 8.16 (d, $J$ = 8.01 Hz, 1H); <b><sup>13</sup>C NMR</b> (125 MHz, $CDCl_3$ ) $\delta$ ppm: 163.0, 151.3, 135.3, 133.9, 133.8, 132.8, 130.2, 117.4, 115.0, 113.7, 107.2; <b>HRMS</b> (ESI) calculated $[M+H]^+$ for $C_{11}H_7N_2O_2$ : 198.1820, found: 198.1818.                                                                                    |
| <b>3-(furan-2-ylmethylene)azetidine-2,4-dione (9c)</b>                              |                                                                                                                                                                                                                                                                                                                                                                                                                                                                                                                                                                                                                                           |

|                                                                                     |                                                                                                                                                                                                                                                                                                                                                                                                                                                                                                                                                                                     |
|-------------------------------------------------------------------------------------|-------------------------------------------------------------------------------------------------------------------------------------------------------------------------------------------------------------------------------------------------------------------------------------------------------------------------------------------------------------------------------------------------------------------------------------------------------------------------------------------------------------------------------------------------------------------------------------|
| 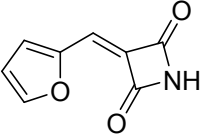   | <p><b>R<sub>f</sub></b>: 0.34 (Pet. ether /EtOAc = 60/40); <b>Yield</b>: 145 mg, 86%;<br/> White solid; <b>mp</b>: 146-148°C; <b><sup>1</sup>H NMR</b> (500 MHz, DMSO-<i>d</i><sub>6</sub>) δ ppm: 6.62 (br. s., 1H), 7.29 (br. s., 1H), 7.77 (br. s., 1H), 7.90 (br. s., 1H); <b><sup>13</sup>C NMR</b> (125 MHz, DMSO-<i>d</i><sub>6</sub>) δ ppm : 162.6, 147.1, 137.7, 120.4, 114.5, 112.6, 98.3; <b>HRMS</b> (ESI) calculated [M+H]<sup>+</sup> for C<sub>8</sub>H<sub>6</sub>NO<sub>3</sub>: 163.1310, found: 163.1312.</p>                                                   |
| <p><b>3-(4-fluorobenzylidene)azetidine-2,4-dione (9d)</b></p>                       |                                                                                                                                                                                                                                                                                                                                                                                                                                                                                                                                                                                     |
|   | <p><b>R<sub>f</sub></b>: 0.32 (Pet. ether /EtOAc = 60/40); <b>Yield</b>: 121 mg, 79%;<br/> White solid; <b>mp</b>: 160-164°C; <b><sup>1</sup>H NMR</b> (500 MHz, DMSO-<i>d</i><sub>6</sub>) δ ppm: 7.09 (t, <i>J</i>=8.58 Hz, 2H), 7.85 - 7.95 (m, 2H), 8.08 (s, 1H), 8.48 (br. s., 1H); <b><sup>13</sup>C NMR</b> (125 MHz, CDCl<sub>3</sub>) δ ppm : 165.7, 163.6, 152.2, 132.9, 132.9, 127.8, 116.2, 116.0, 115.6, 103.7; <b>HRMS</b> (ESI) calculated [M+H]<sup>+</sup> for C<sub>10</sub>H<sub>7</sub>NO<sub>2</sub>F: 192.0455, found: 192.0456.</p>                          |
| <p><b>3-(2-methoxybenzylidene)azetidine-2,4-dione (9e)</b></p>                      |                                                                                                                                                                                                                                                                                                                                                                                                                                                                                                                                                                                     |
|  | <p><b>R<sub>f</sub></b>: 0.31 (Pet. ether /EtOAc = 60/40); <b>Yield</b>: 120 mg, 87%;<br/> White solid; <b>mp</b>: 176-178°C; <b><sup>1</sup>H NMR</b> (400 MHz, DMSO-<i>d</i><sub>6</sub>) δ ppm : 8.62 (1H, s), 8.17 (1H, d, <i>J</i>=7.3 Hz), 7.42 (1H, t, <i>J</i>= 7.6 Hz), 6.83-7.04 (2H, m), 3.81 (3H, s); <b><sup>13</sup>C NMR</b> (101 MHz, CDCl<sub>3</sub>) δ ppm : 163.9, 158.5, 148.7, 134.2, 128.6, 120.3, 115.8, 110.7, 102.8, 55.2; <b>HRMS</b> (ESI) calculated [M+H]<sup>+</sup> for C<sub>11</sub>H<sub>9</sub>NO<sub>3</sub>Na: 226.0475, found: 226.0478.</p> |
| <p><b>3-(3,4,5-trimethoxybenzylidene)azetidine-2,4-dione (9f)</b></p>               |                                                                                                                                                                                                                                                                                                                                                                                                                                                                                                                                                                                     |
|                                                                                     | <p><b>R<sub>f</sub></b>: 0.35 (Pet. ether / EtOAc = 70/30); <b>Yield</b>: 107 mg, 80%; White solid; <b>mp</b>: 210°C; <b><sup>1</sup>H NMR</b> (500 MHz,</p>                                                                                                                                                                                                                                                                                                                                                                                                                        |

|                                                                                     |                                                                                                                                                                                                                                                                                                                                                                                                                                                                                                                                                                                                                                                                                                                                                     |
|-------------------------------------------------------------------------------------|-----------------------------------------------------------------------------------------------------------------------------------------------------------------------------------------------------------------------------------------------------------------------------------------------------------------------------------------------------------------------------------------------------------------------------------------------------------------------------------------------------------------------------------------------------------------------------------------------------------------------------------------------------------------------------------------------------------------------------------------------------|
| 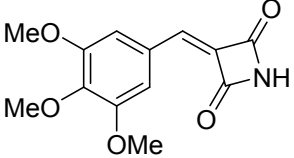   | <p><i>CHLOROFORM-d</i> <math>\delta</math> ppm: 3.77 - 3.87 (m, 9H), 7.14 - 7.27 (m, 2H), 8.02 (br. s., 1H); <math>^{13}\text{C}</math> NMR (125 MHz, <math>\text{CDCl}_3</math>) <math>\delta</math> ppm 164.0, 153.9, 152.9, 142.1, 126.5, 116.1, 108.2, 102.1, 60.7, 55.9, 40.0; HRMS (ESI) calculated <math>[\text{M}+\text{H}]^+</math> for <math>\text{C}_{13}\text{H}_{13}\text{NO}_5\text{Na}</math>: 286.0686, found: 286.0690.</p>                                                                                                                                                                                                                                                                                                        |
| <b>3-(4-isopropylbenzylidene)azetidine-2,4-dione (9g)</b>                           |                                                                                                                                                                                                                                                                                                                                                                                                                                                                                                                                                                                                                                                                                                                                                     |
|   | <p><math>R_f</math>: 0.37 (Pet. ether /EtOAc = 60/40); <b>Yield</b>: 108 mg, 75%; White solid; <b>mp</b>: 246°C; <math>^1\text{H}</math> NMR (400 MHz, <math>\text{CDCl}_3</math>) <math>\delta</math> ppm : 8.30 (1H, s), 7.99 (2H, m, <math>J=7.9</math> Hz), 7.40 (2H, m, <math>J=7.9</math> Hz), 2.94-3.07 (1H, m), 1.26-1.31 (7H, m); <math>^{13}\text{C}</math> NMR (50 MHz, <math>\text{CDCl}_3</math>) <math>\delta</math> ppm : <math>^{13}\text{C}</math> NMR (101 MHz, <i>CHLOROFORM-d</i>) <math>\delta</math> ppm: 163.5, 154.5, 154.3, 131.0, 129.3, 127.4, 116.3, 102.6, 33.7, 23.4; HRMS (ESI) calculated <math>[\text{M}+\text{H}]^+</math> for <math>\text{C}_{13}\text{H}_{14}\text{NO}_2</math>: 216.1019, found: 216.1022.</p> |
| <b>3-(2,4-dimethoxybenzylidene)azetidine-2,4-dione (9h)</b>                         |                                                                                                                                                                                                                                                                                                                                                                                                                                                                                                                                                                                                                                                                                                                                                     |
|  | <p><math>R_f</math>: 0.3 (Pet. ether /EtOAc = 60/40); <b>Yield</b>: 117 mg, 84%; White solid; <b>mp</b>: 216°C; <math>^1\text{H}</math> NMR (200 MHz, <math>\text{DMSO-d}_6</math>) <math>\delta</math> ppm: 3.68 (s, 7 H), 6.26 (d, <math>J=2.27</math> Hz, 1 H), 6.38 (d, <math>J=6.44</math> Hz, 1 H), 8.14 (d, <math>J=8.84</math> Hz, 1 H), 8.43 (s, 1 H); <math>^{13}\text{C}</math> NMR (126 MHz, <math>\text{DMSO-d}_6</math>) <math>\delta</math> ppm: 164.99, 164.49, 160.70, 147.60, 130.22, 116.65, 113.37, 105.67, 98.51, 97.43, 56.31, 55.17; HRMS:(ESI) calculated <math>[\text{M}+\text{H}]^+</math> for <math>\text{C}_{12}\text{H}_{12}\text{NO}_4</math>: 234.0761, found: 234.0766.</p>                                         |

## 8. $^1\text{H}$ and $^{13}\text{C}$ -NMR Spectras

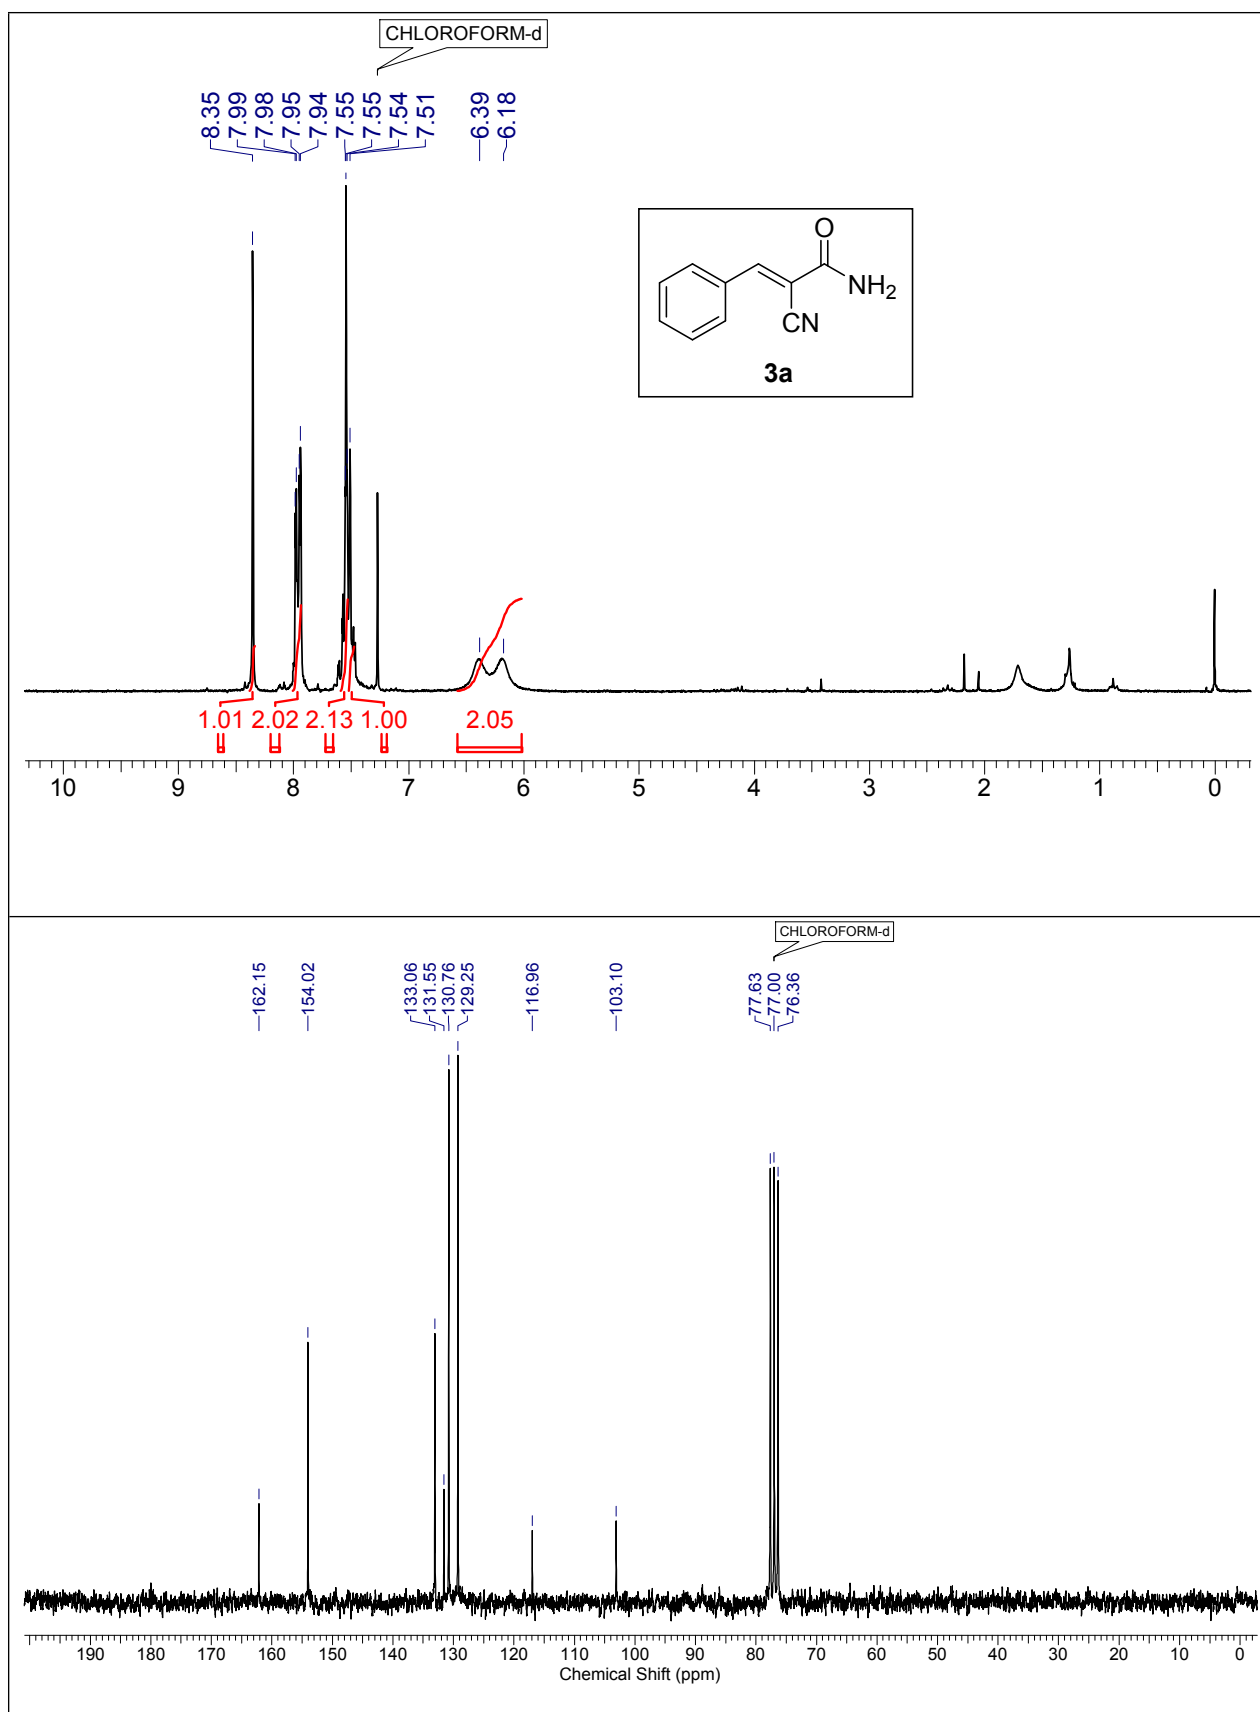

20180220-110014-11772.002.001.1r.esp

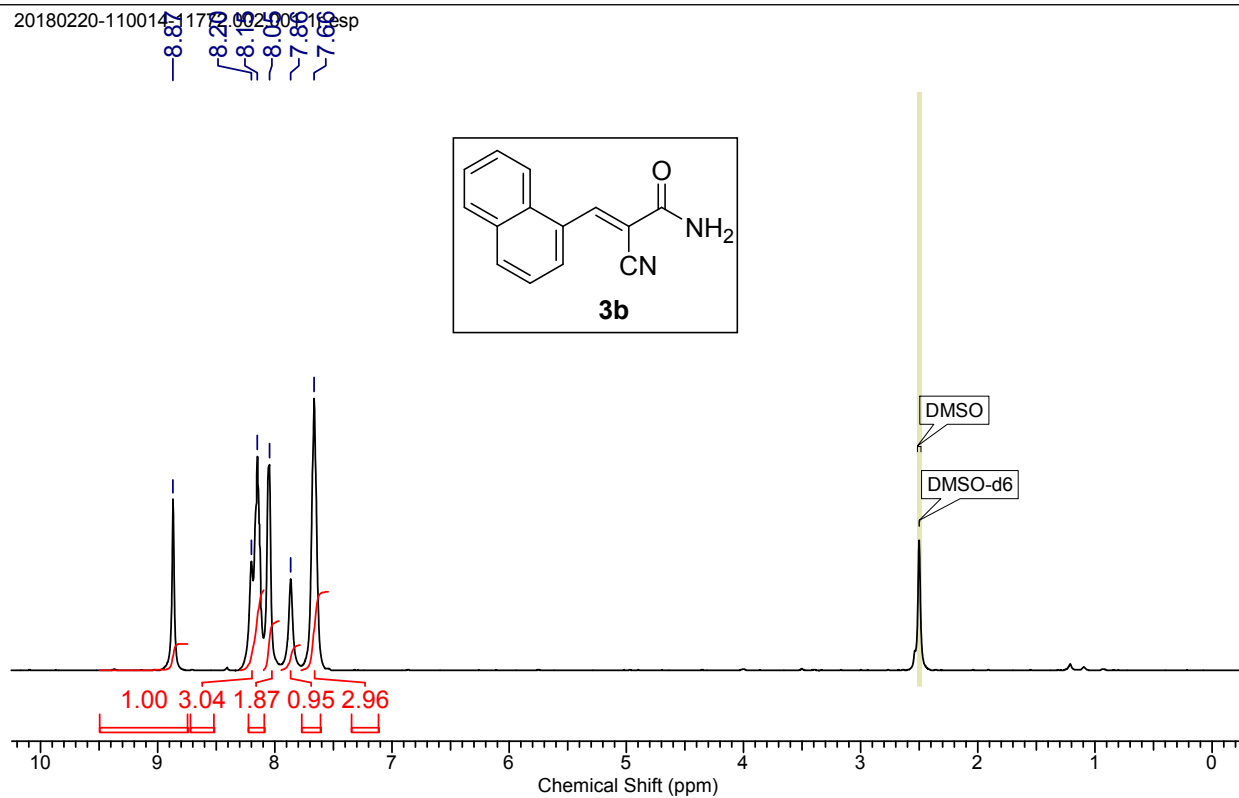

20180206-114316-11772.002.001.1r.esp

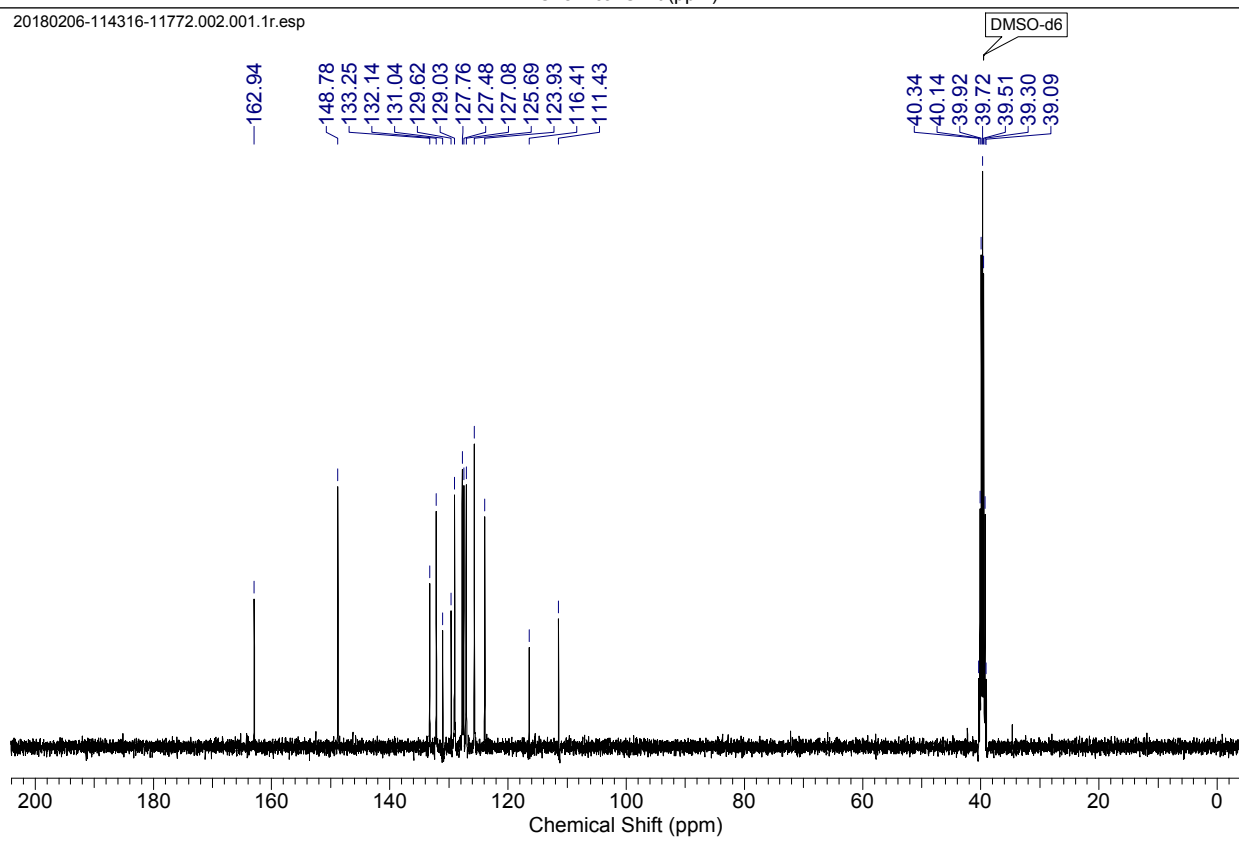

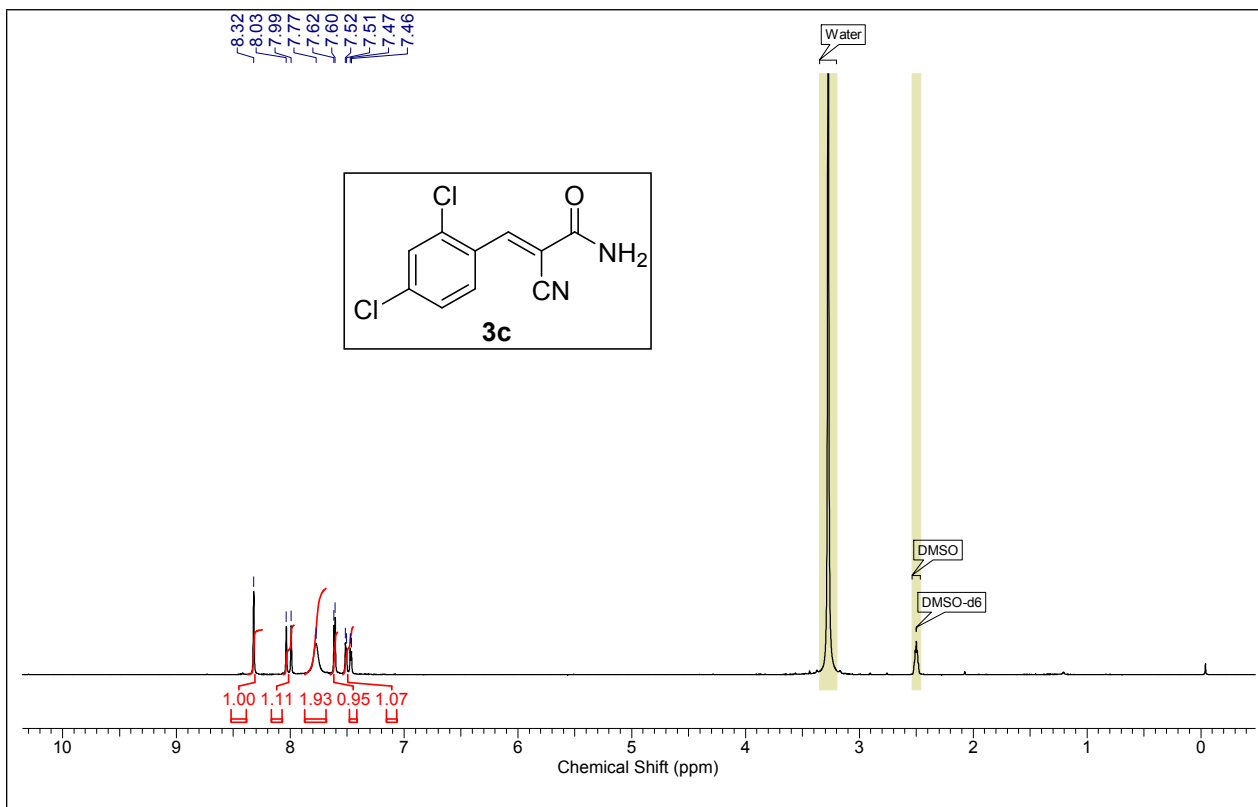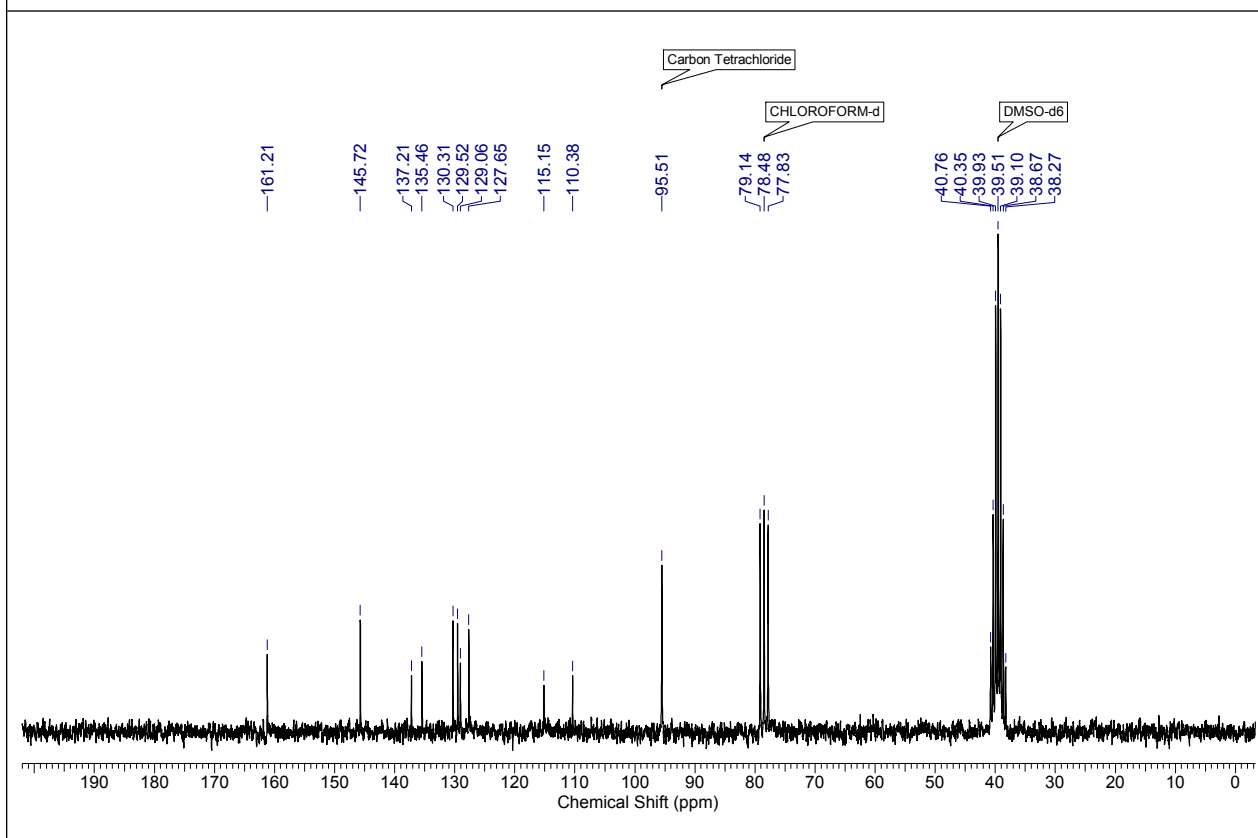



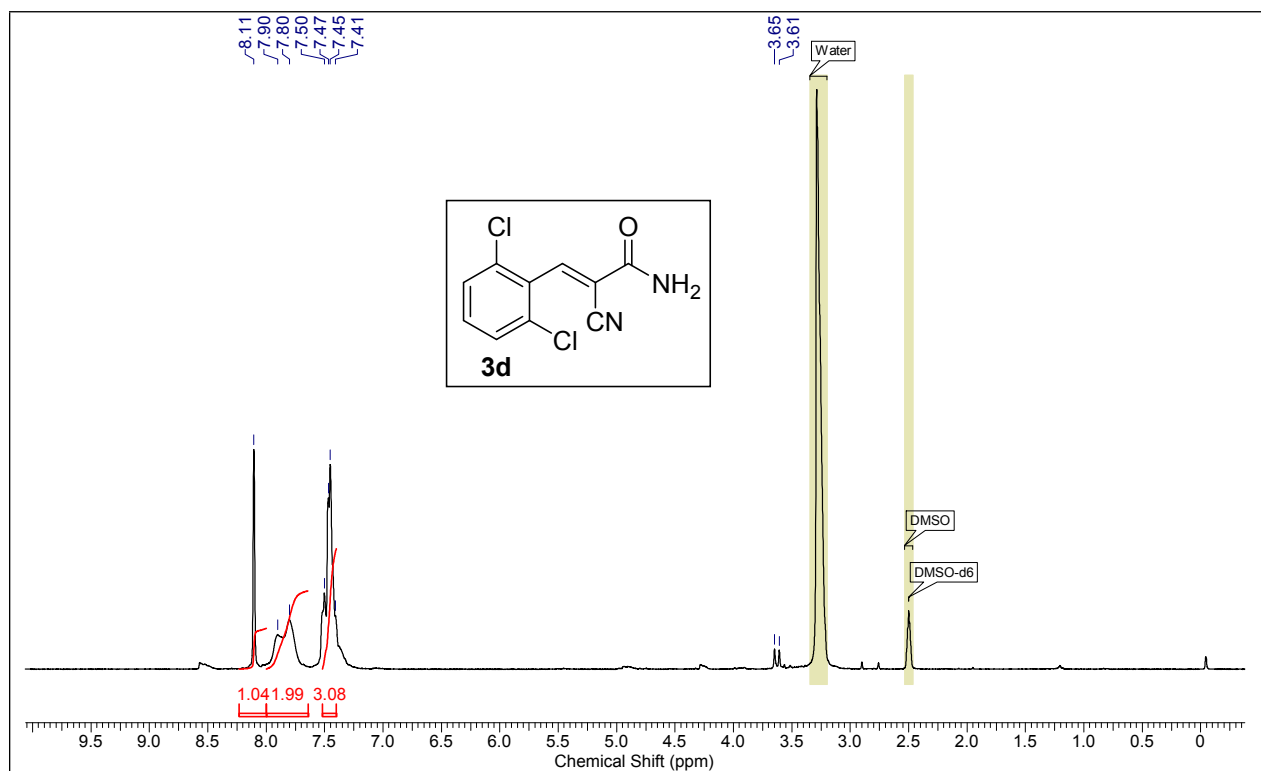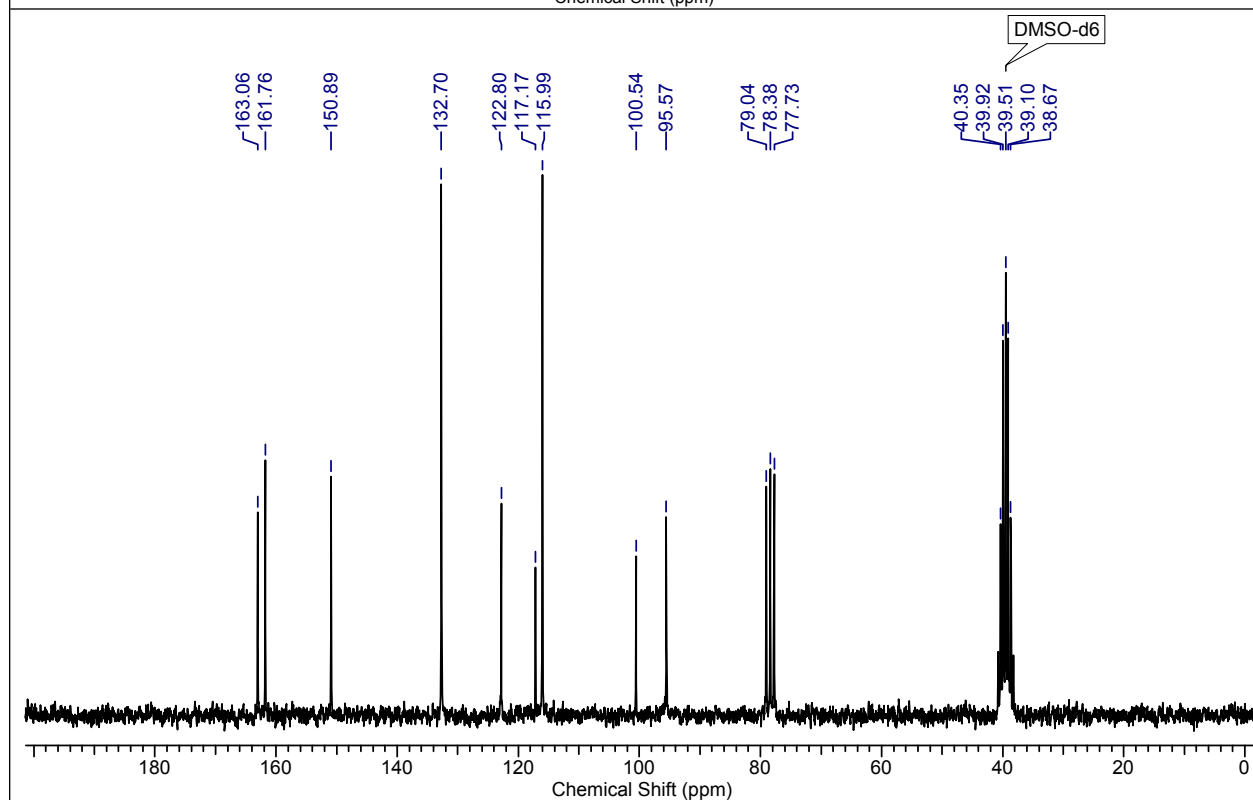

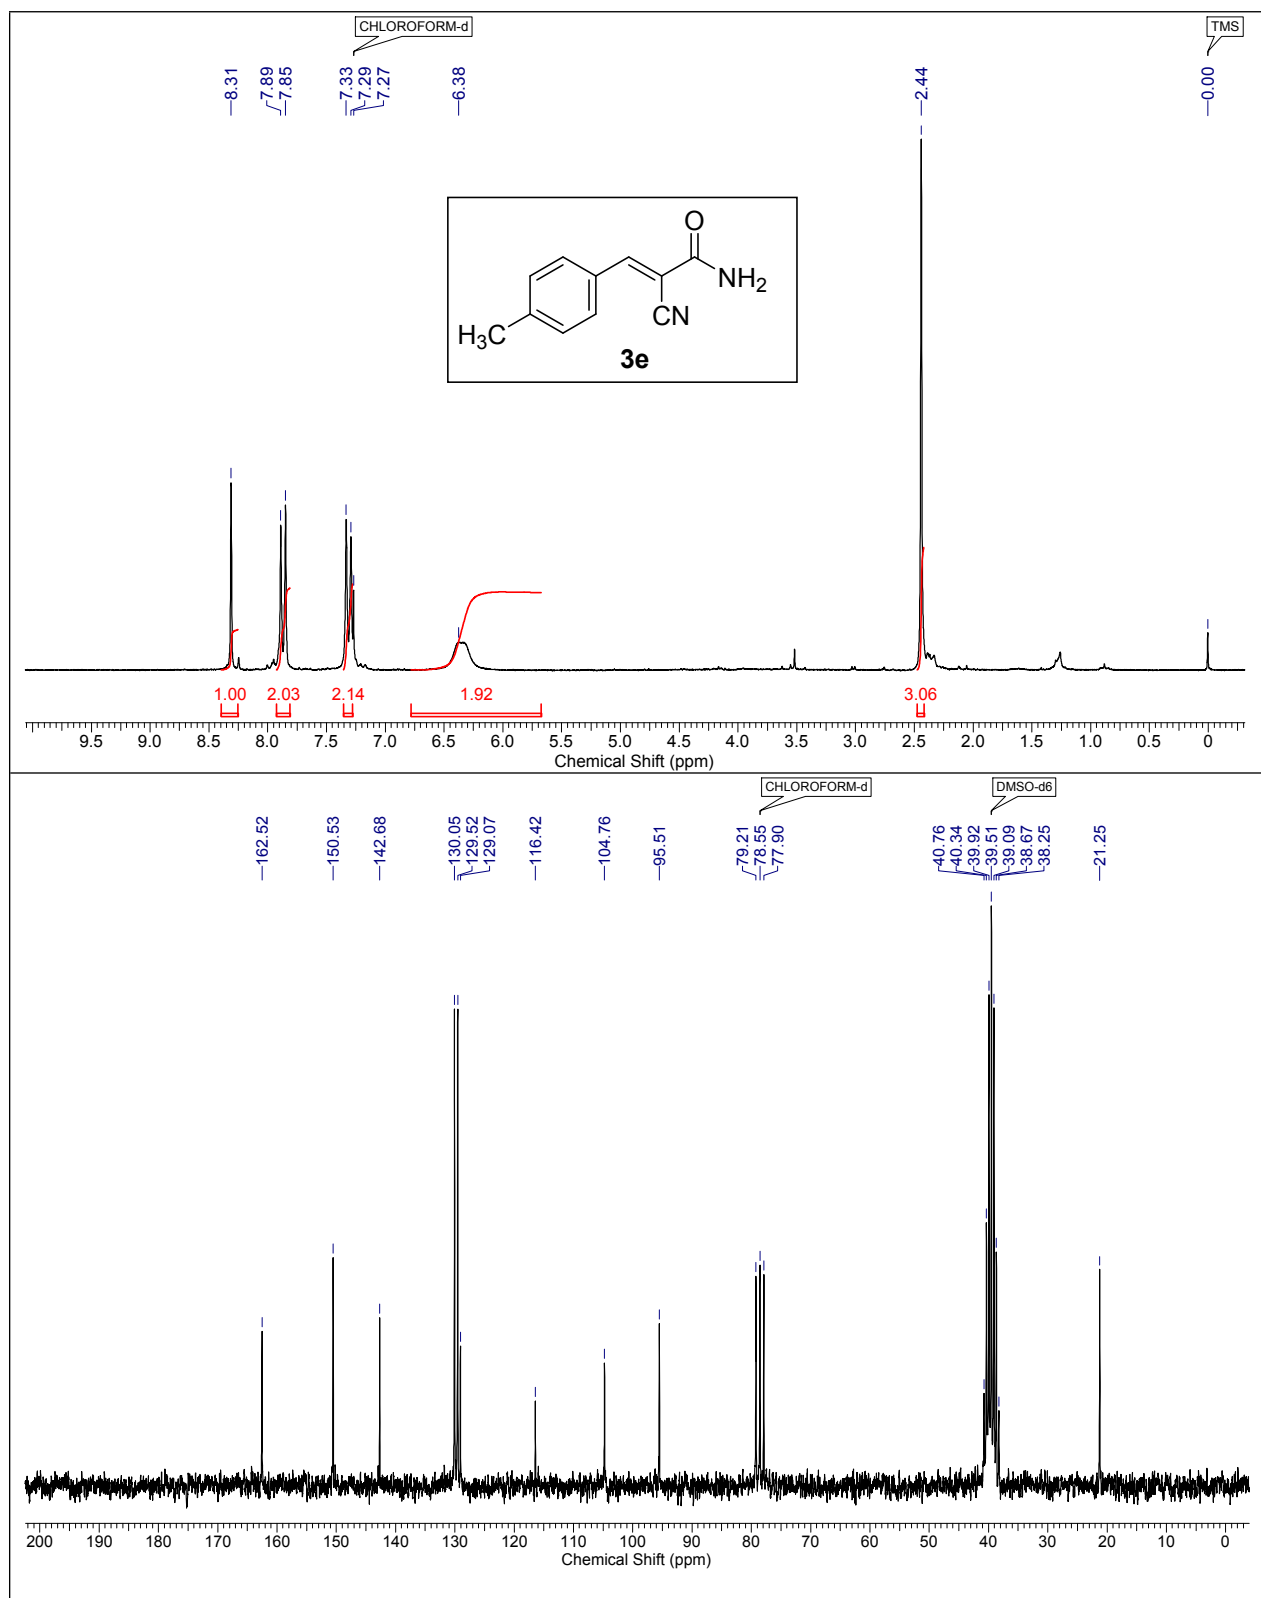

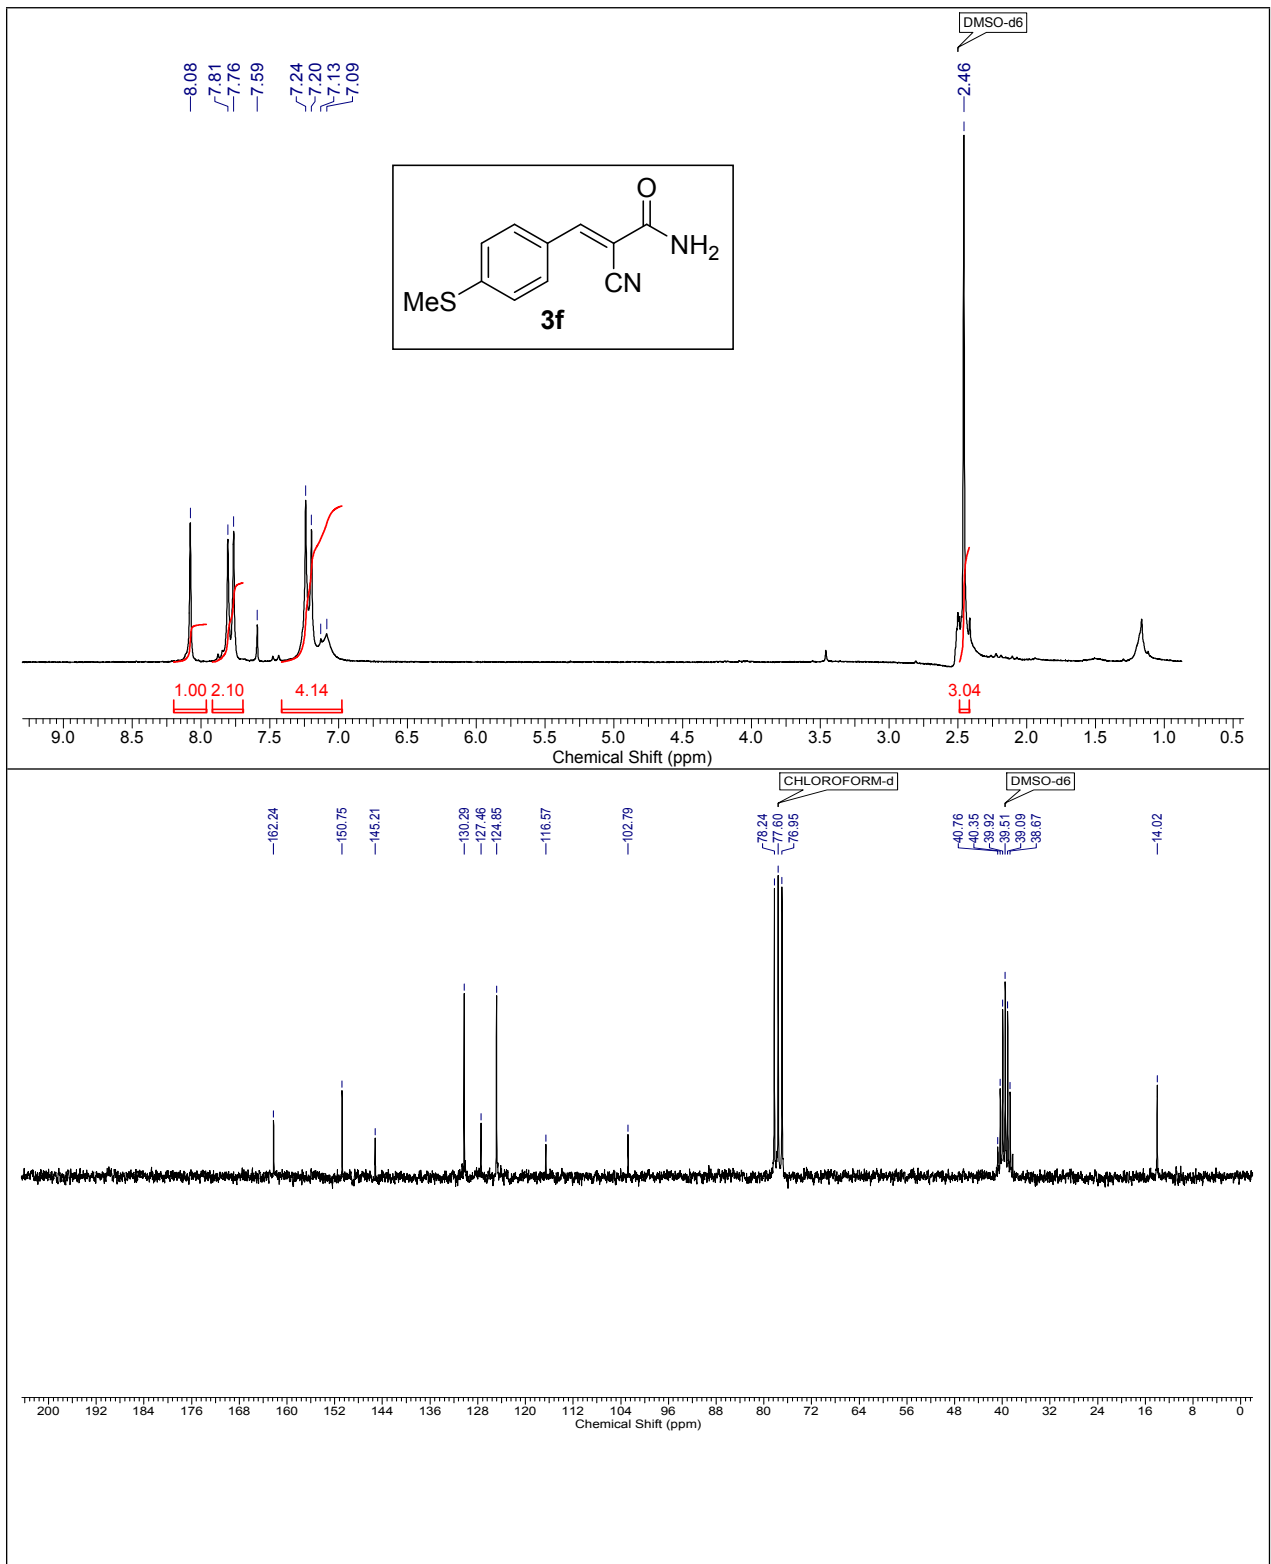

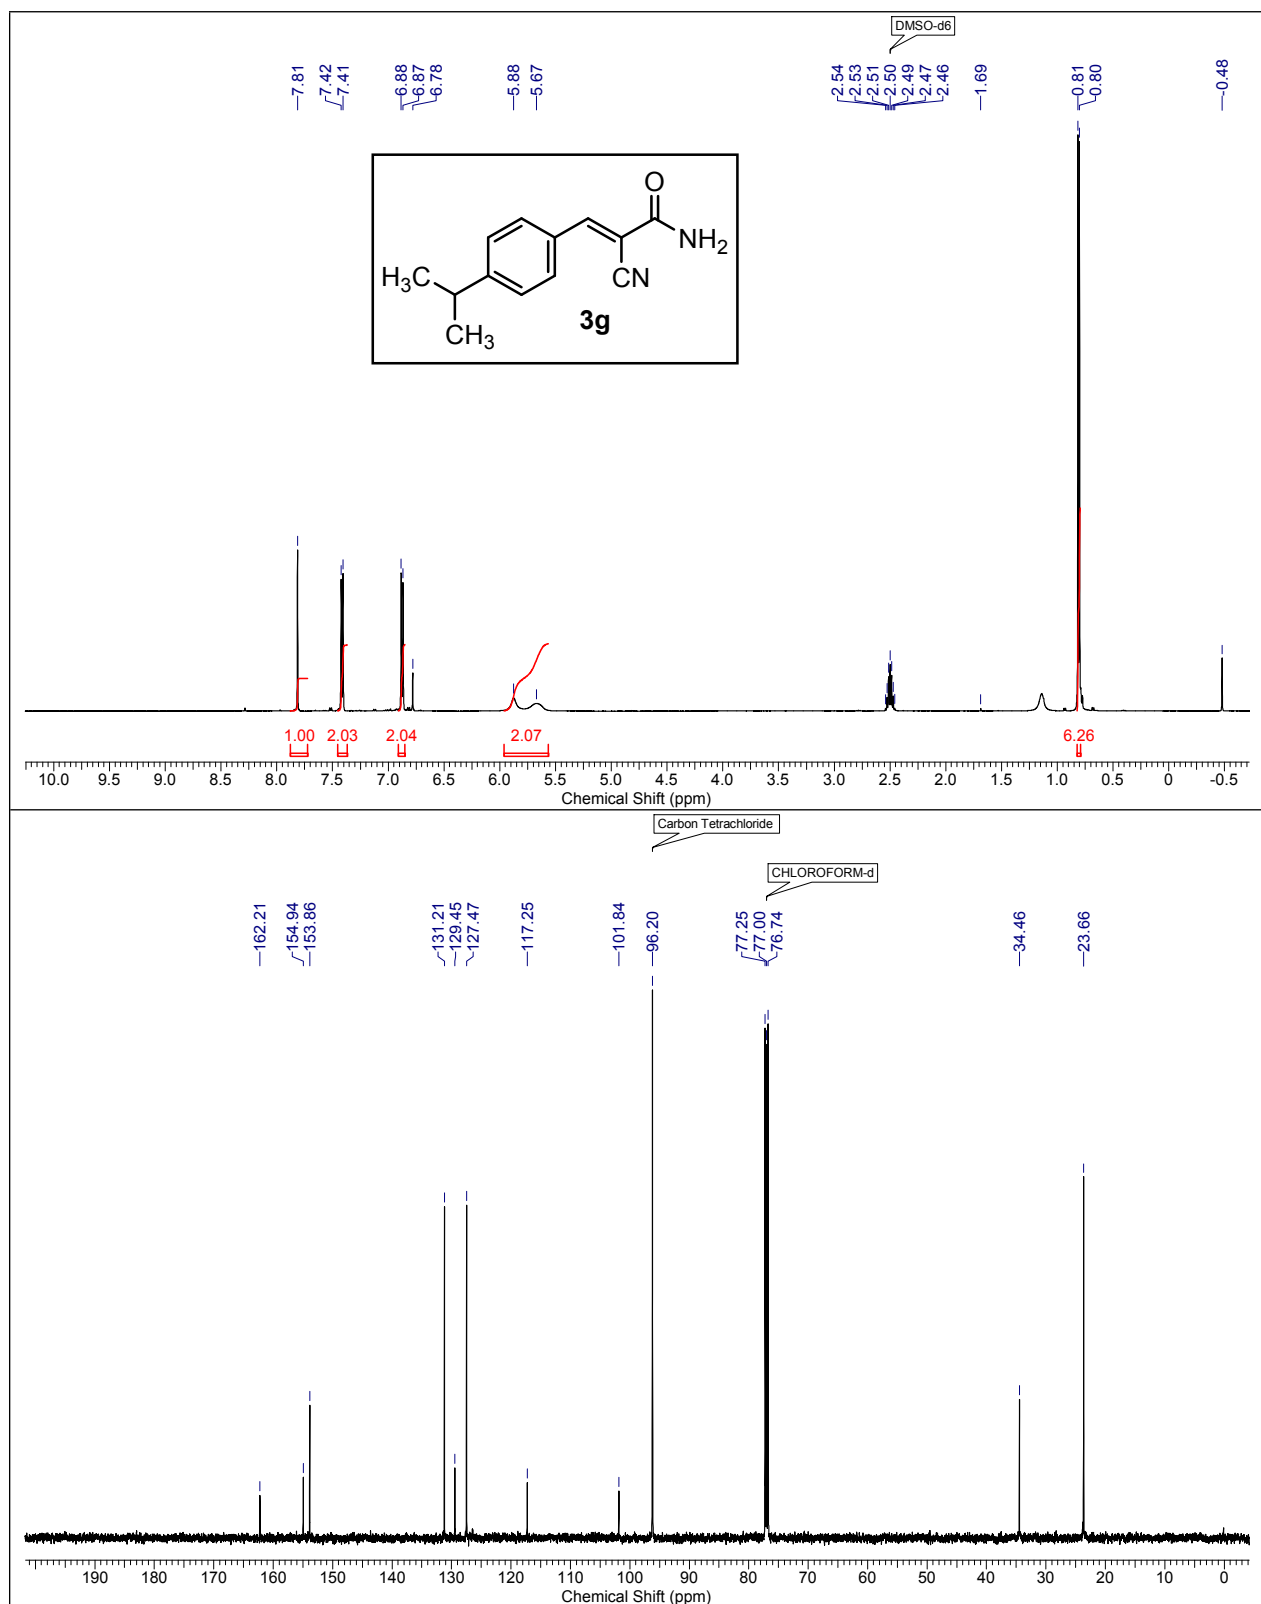

20180223-171106-11772.0021001

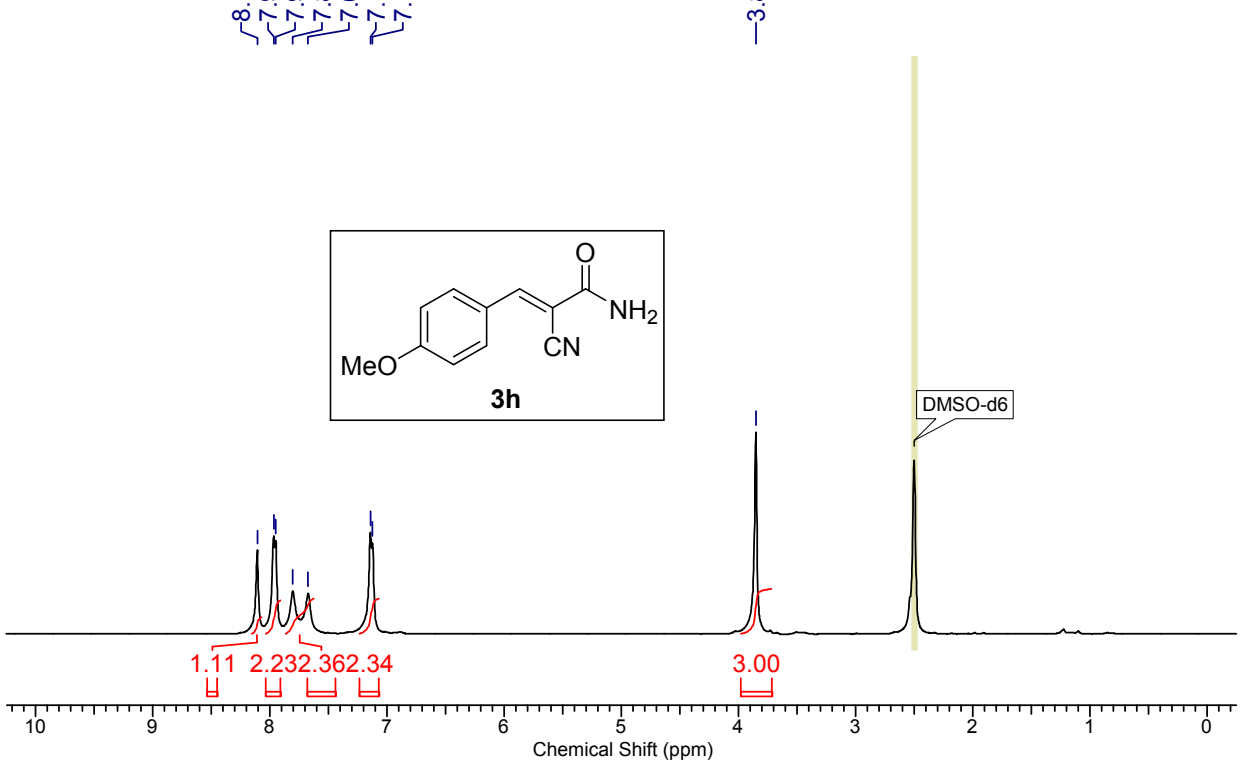

20180223-171106-11772.003.001.1r.esp

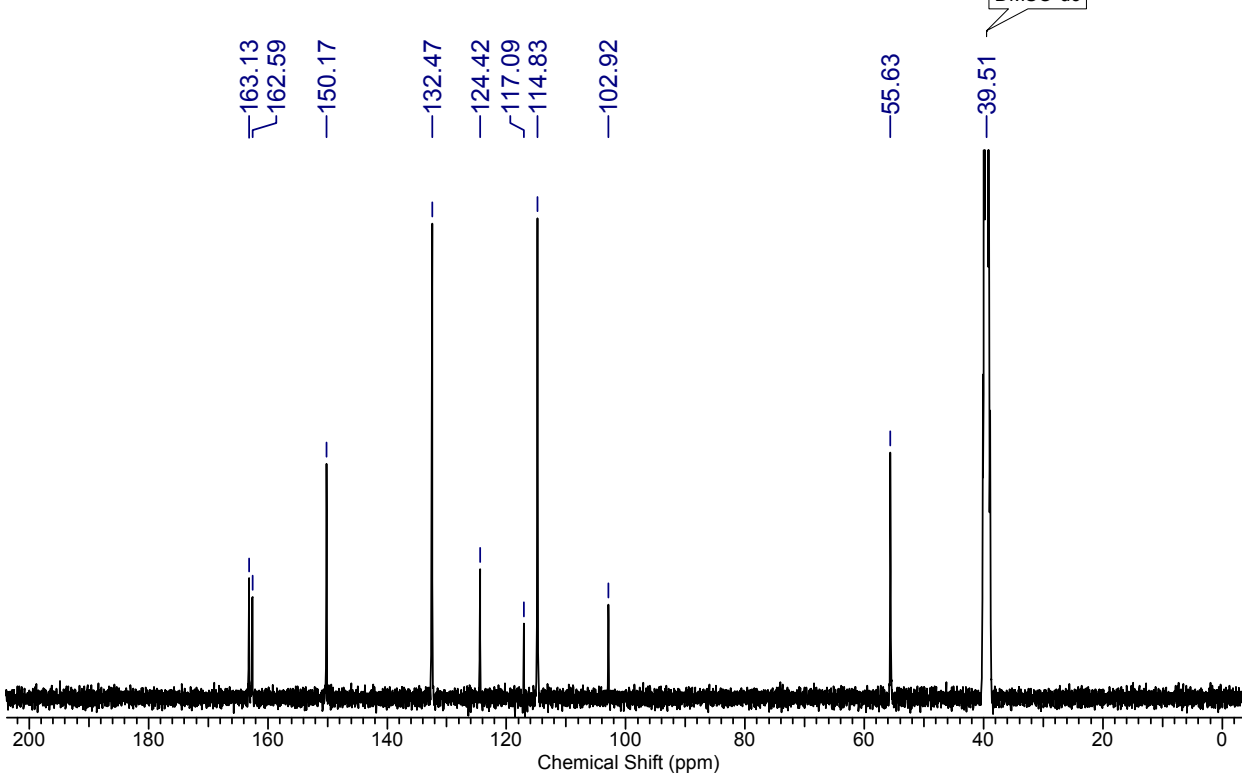

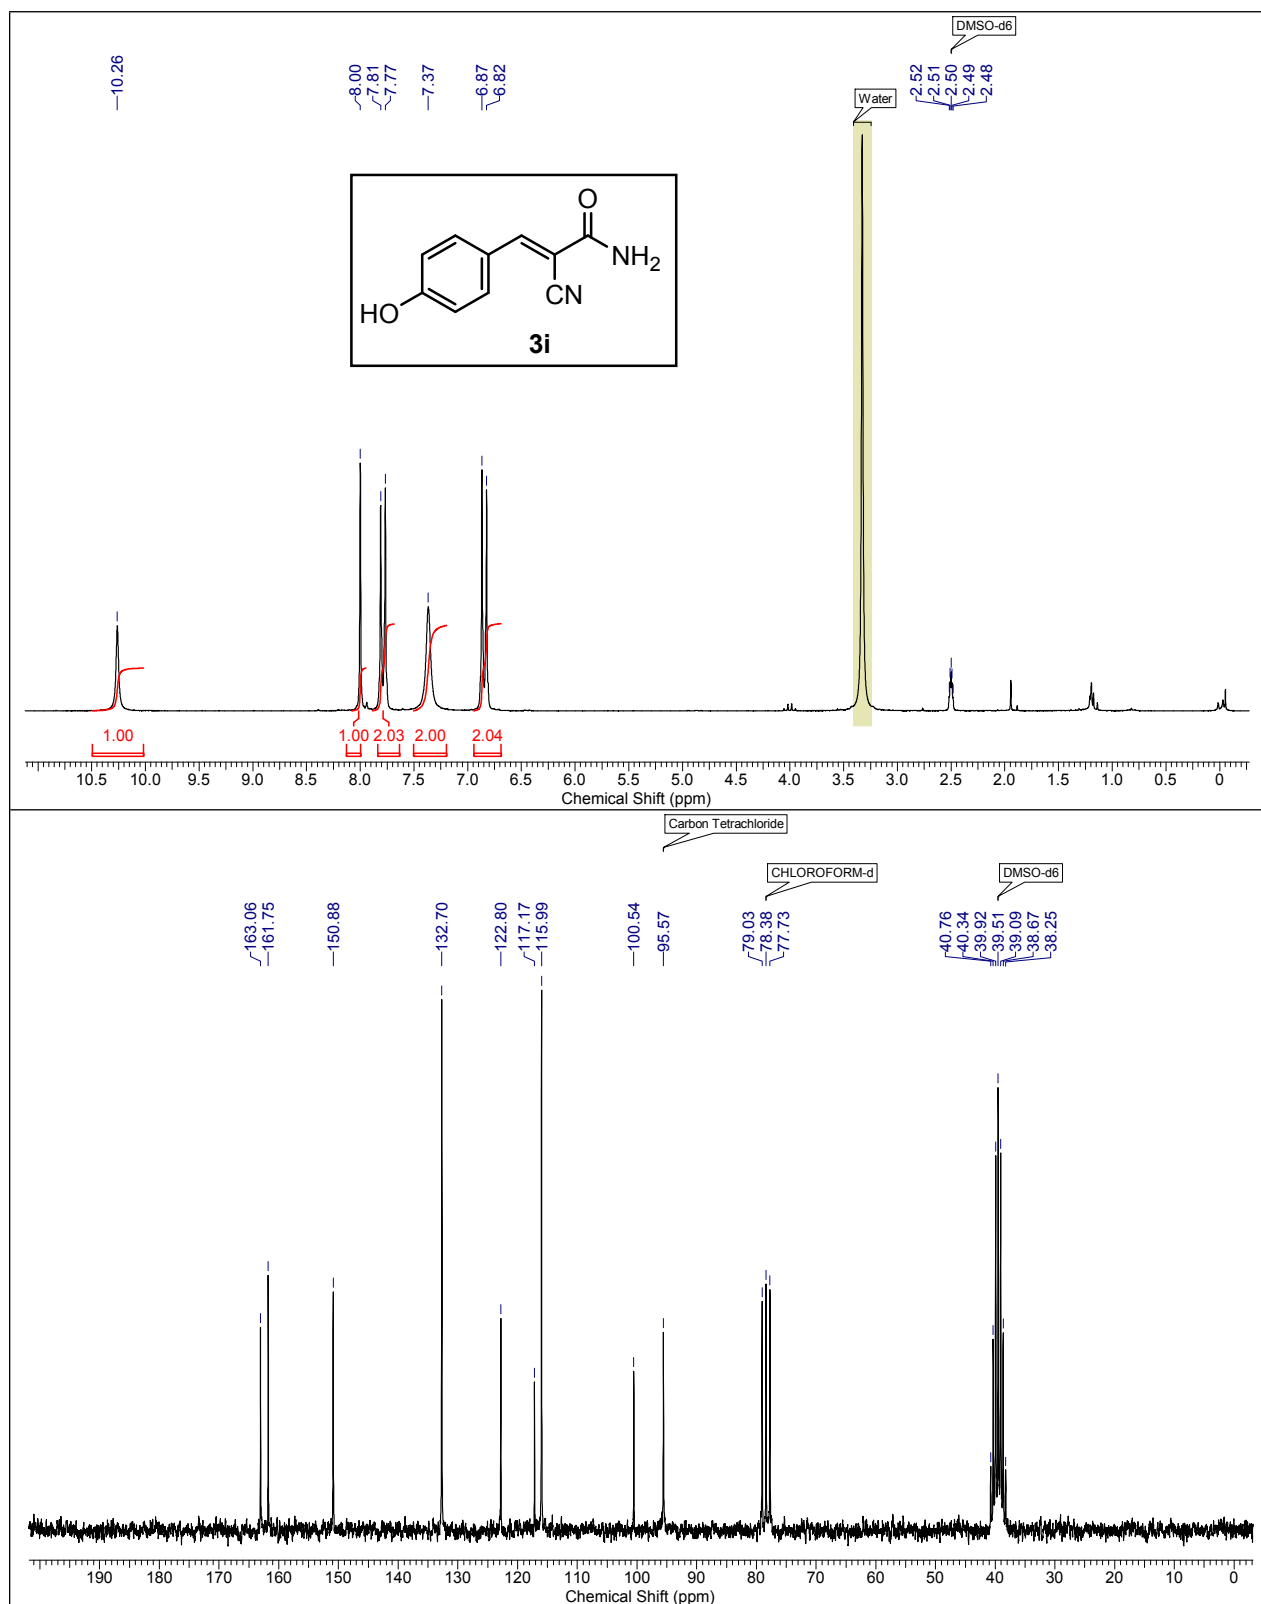

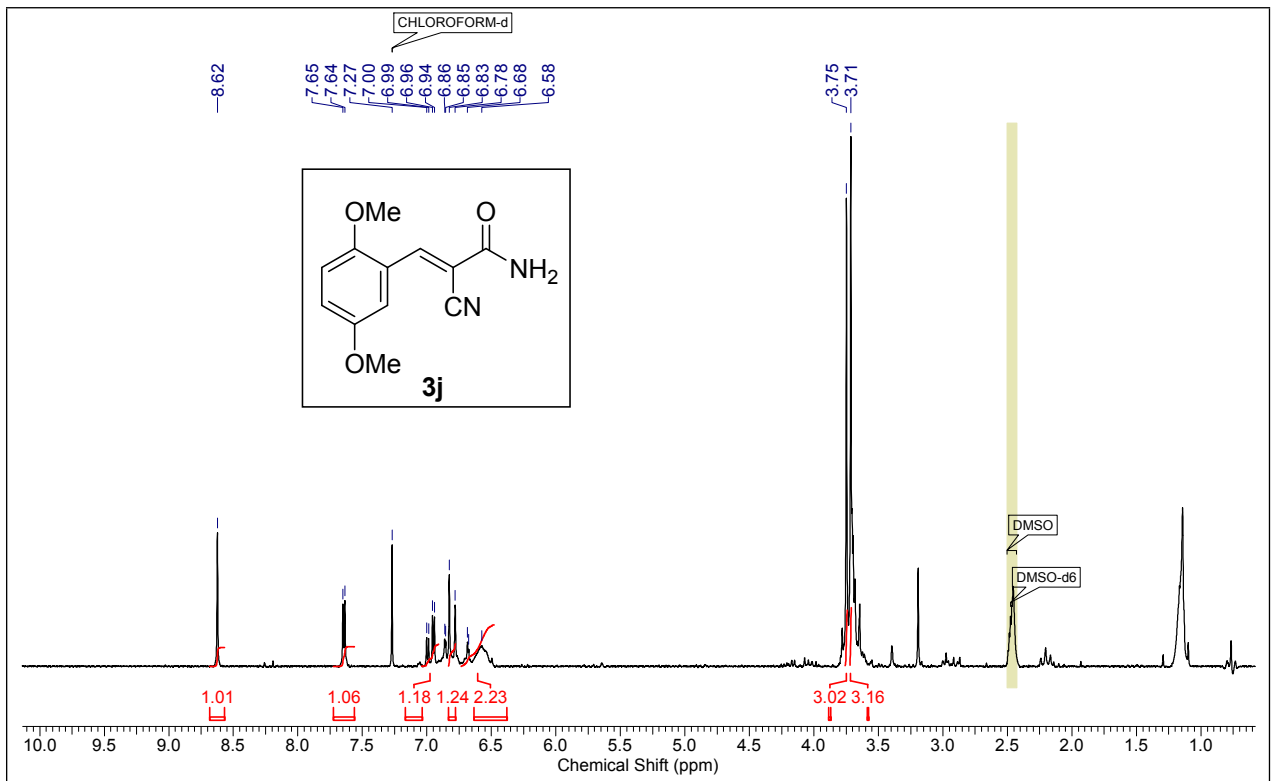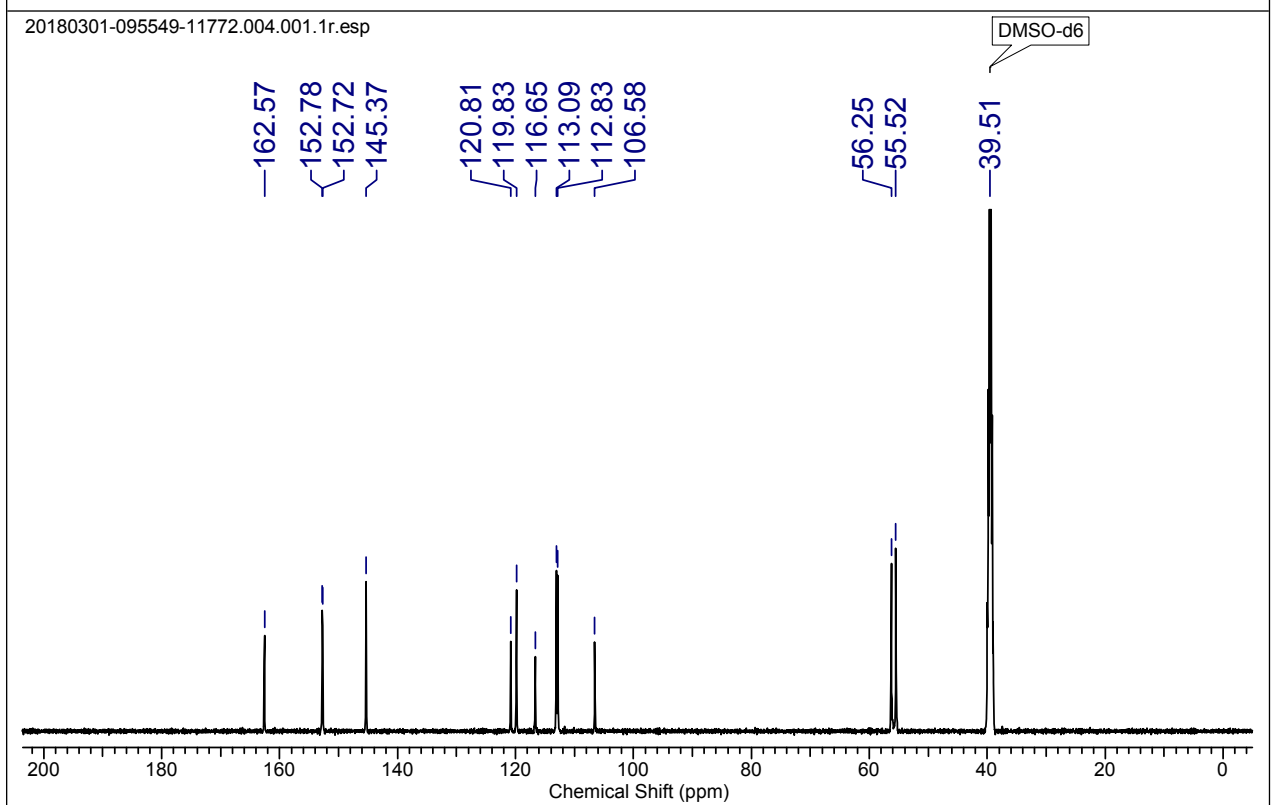

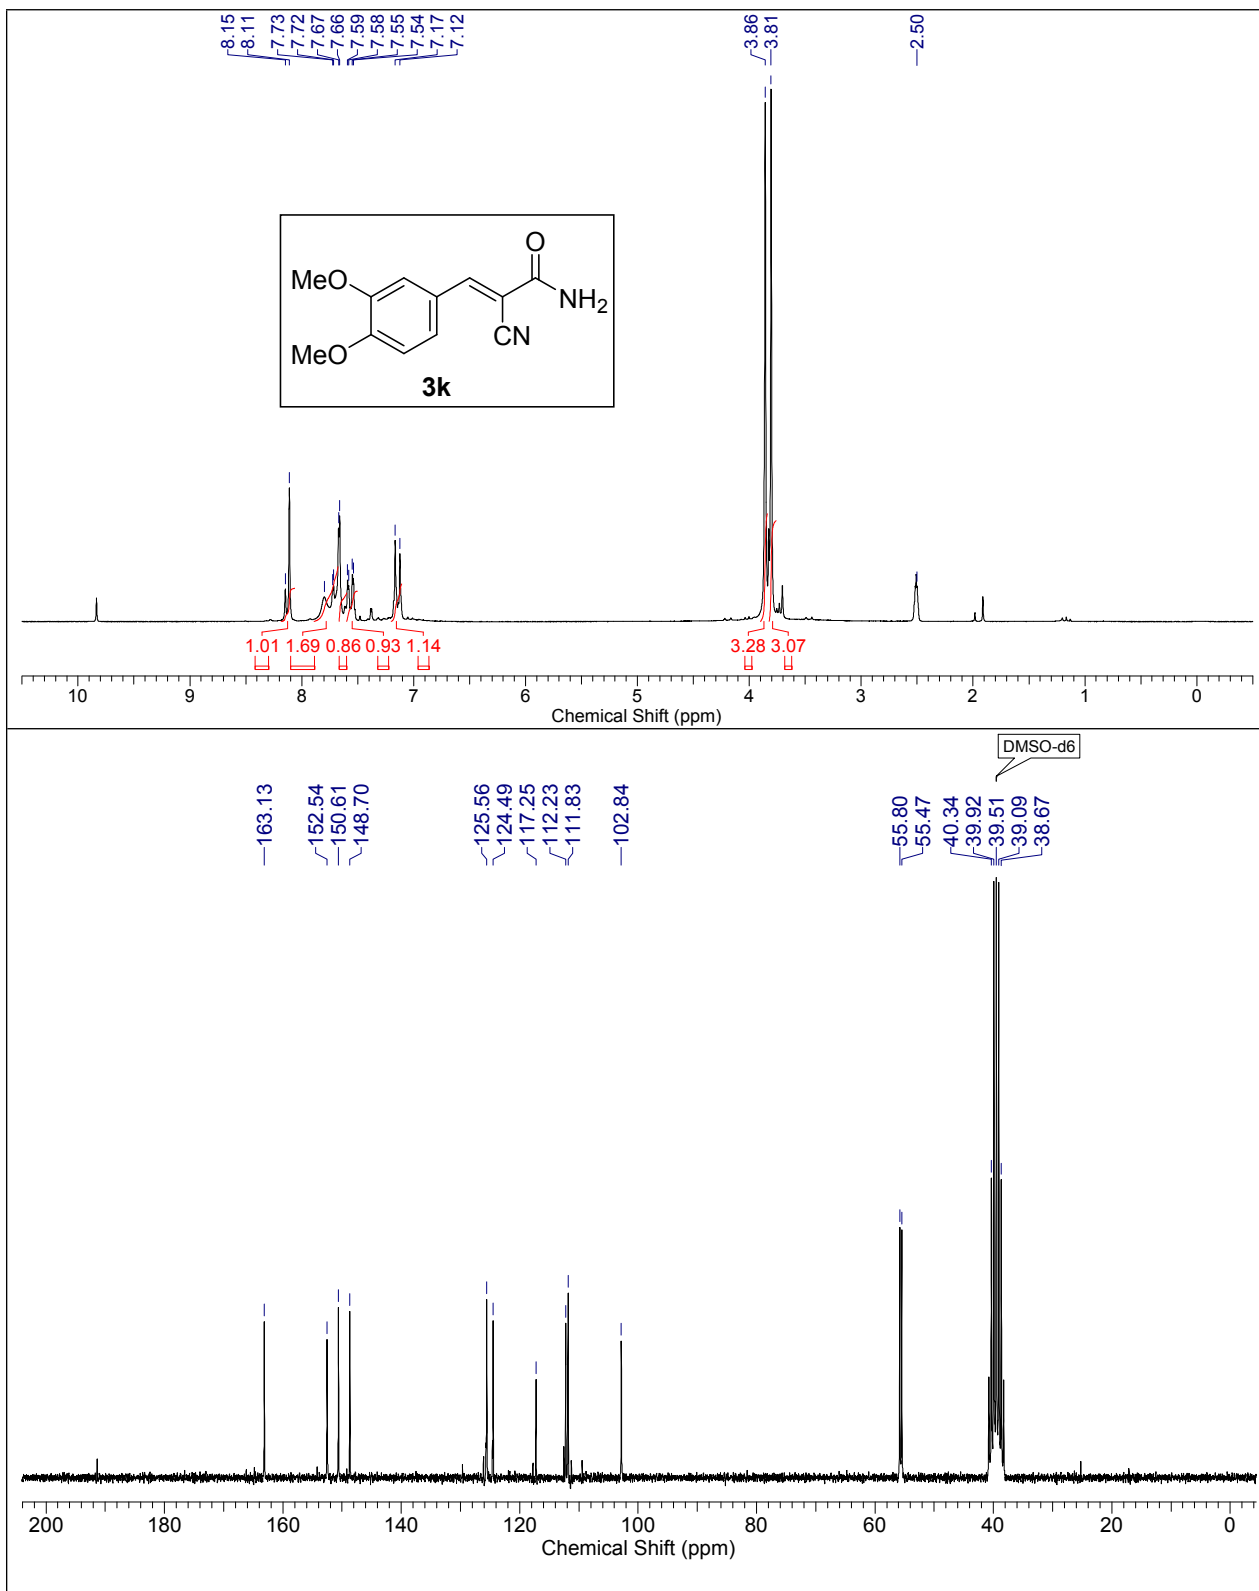



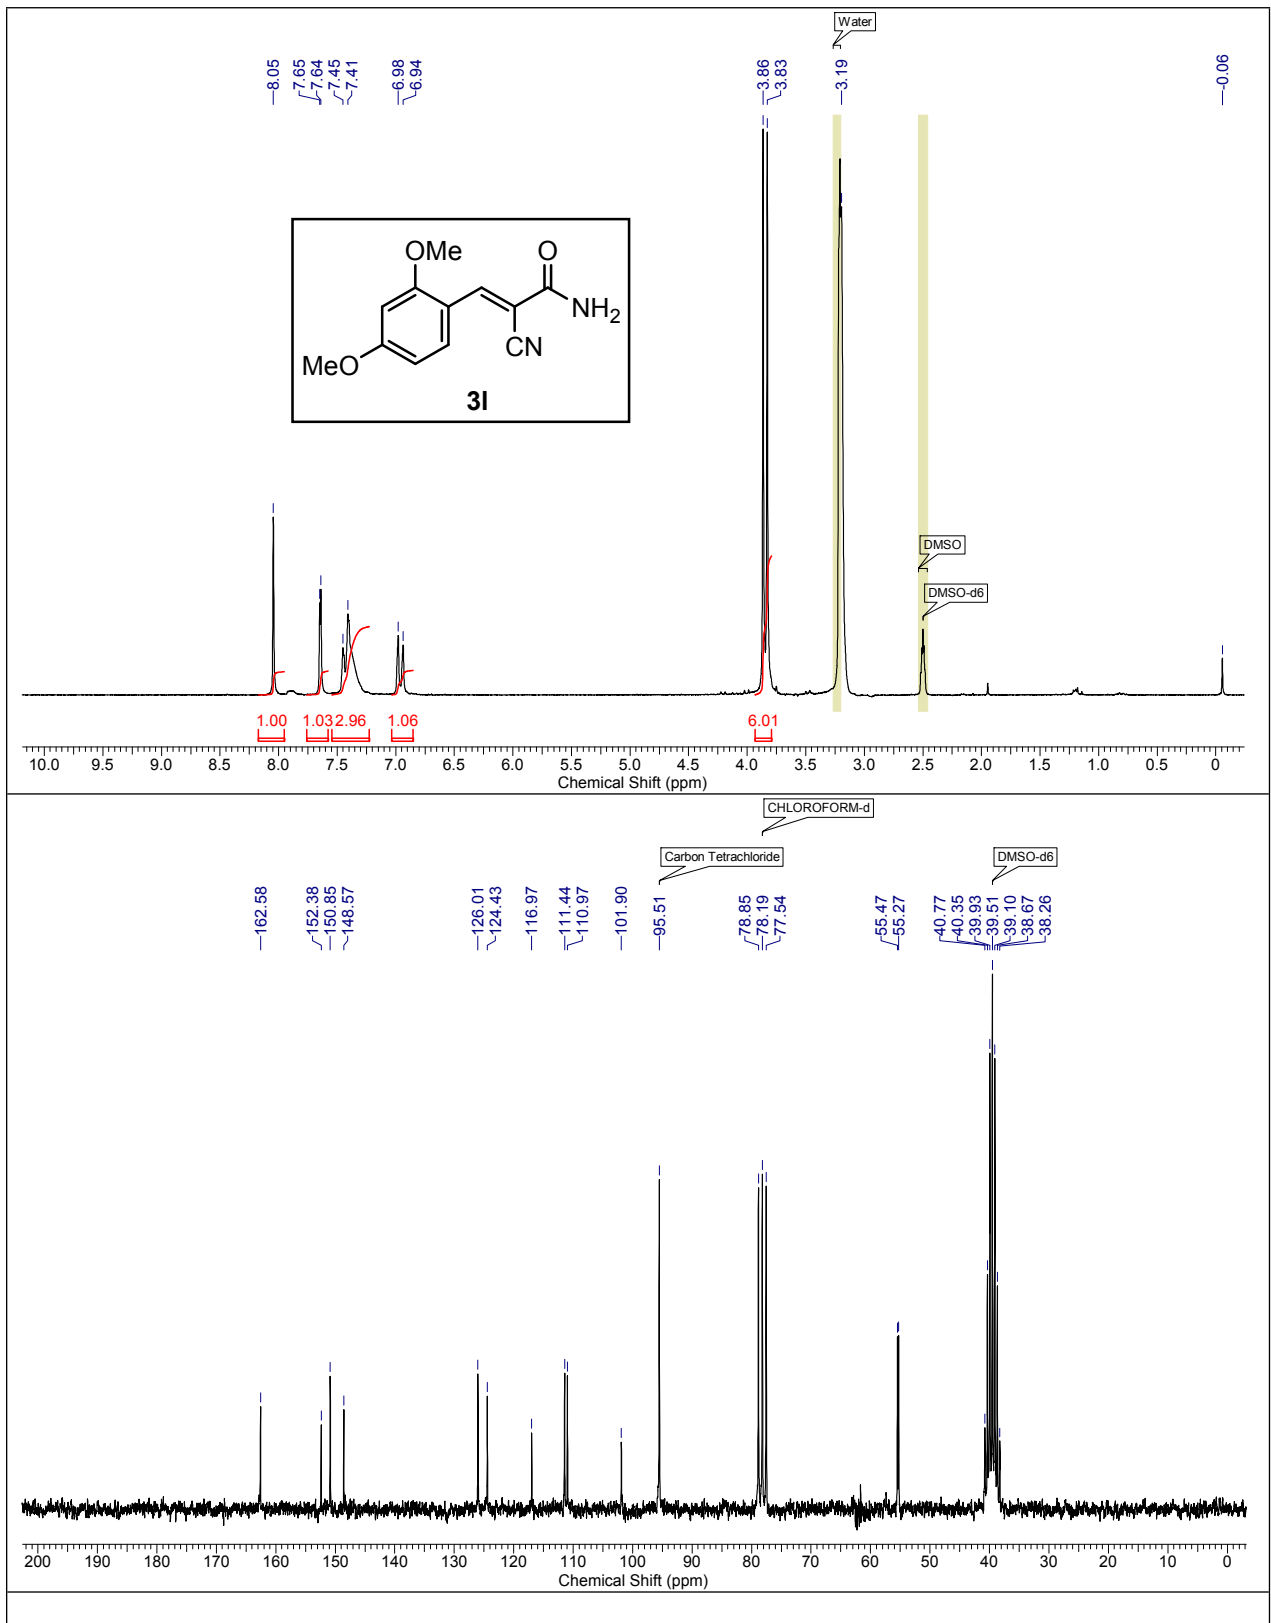

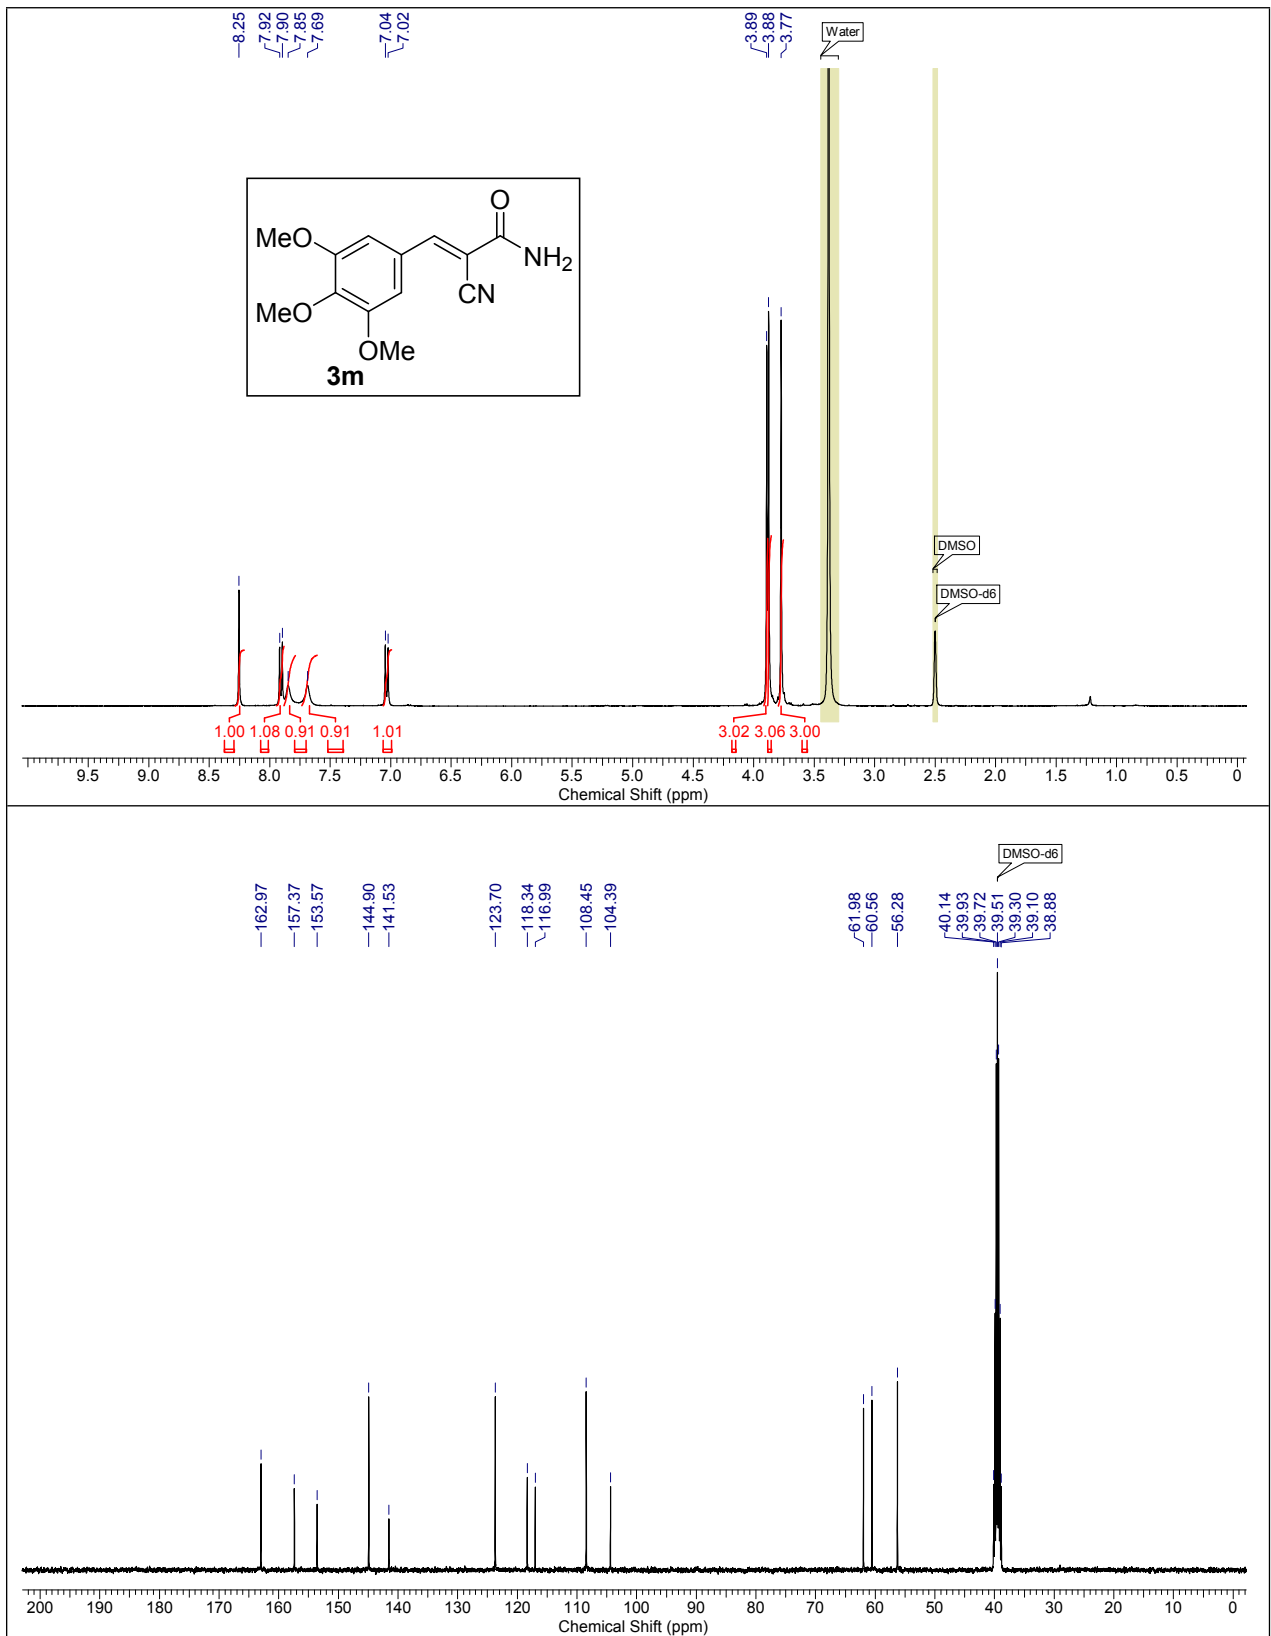

20180209-160503-11772.001.001.1r.esp

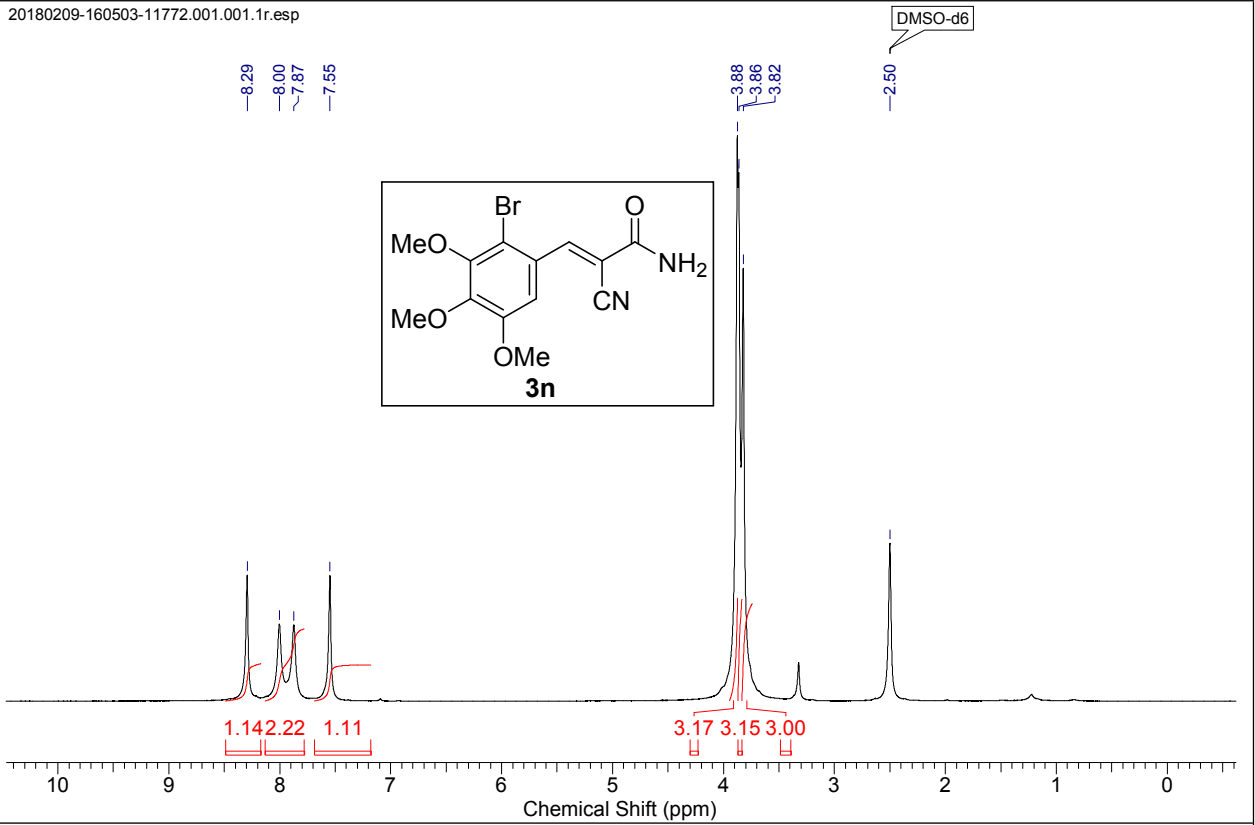

20180209-160503-11772.002.001.1r.esp

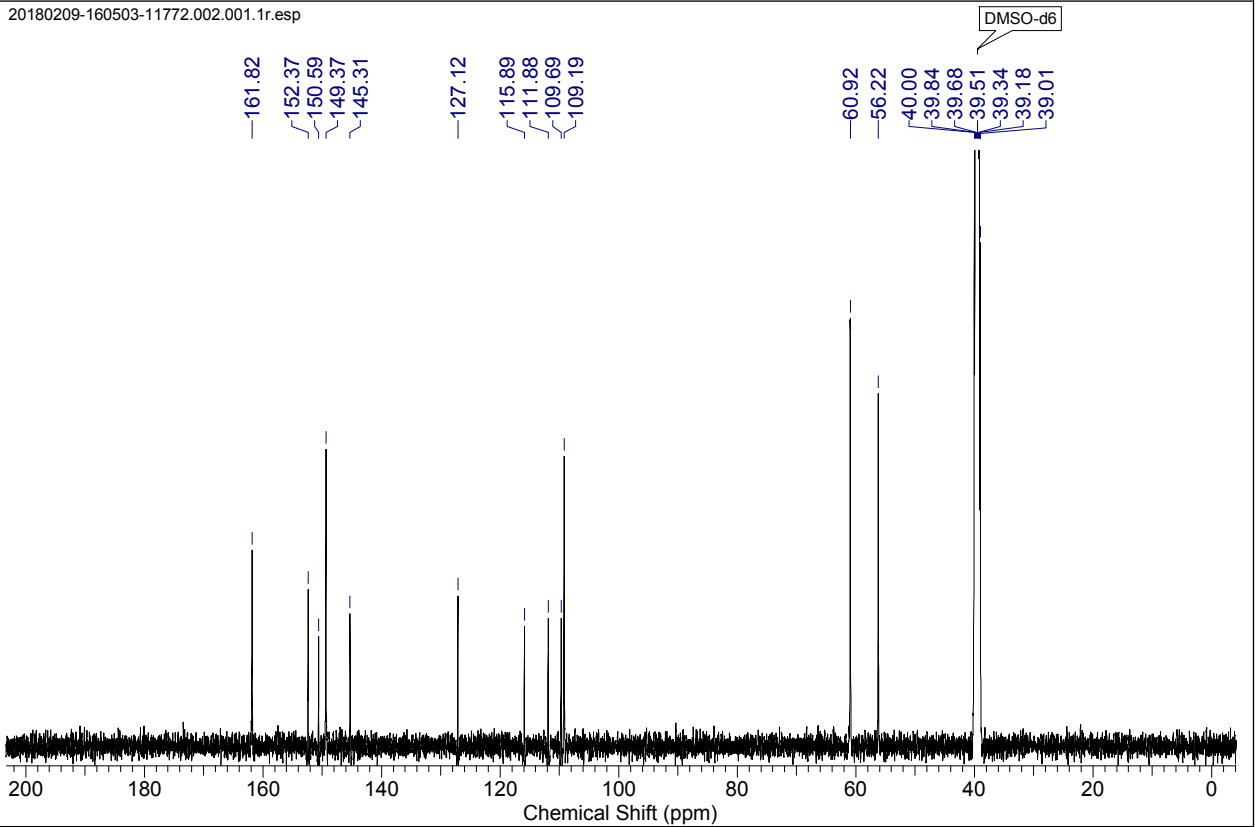

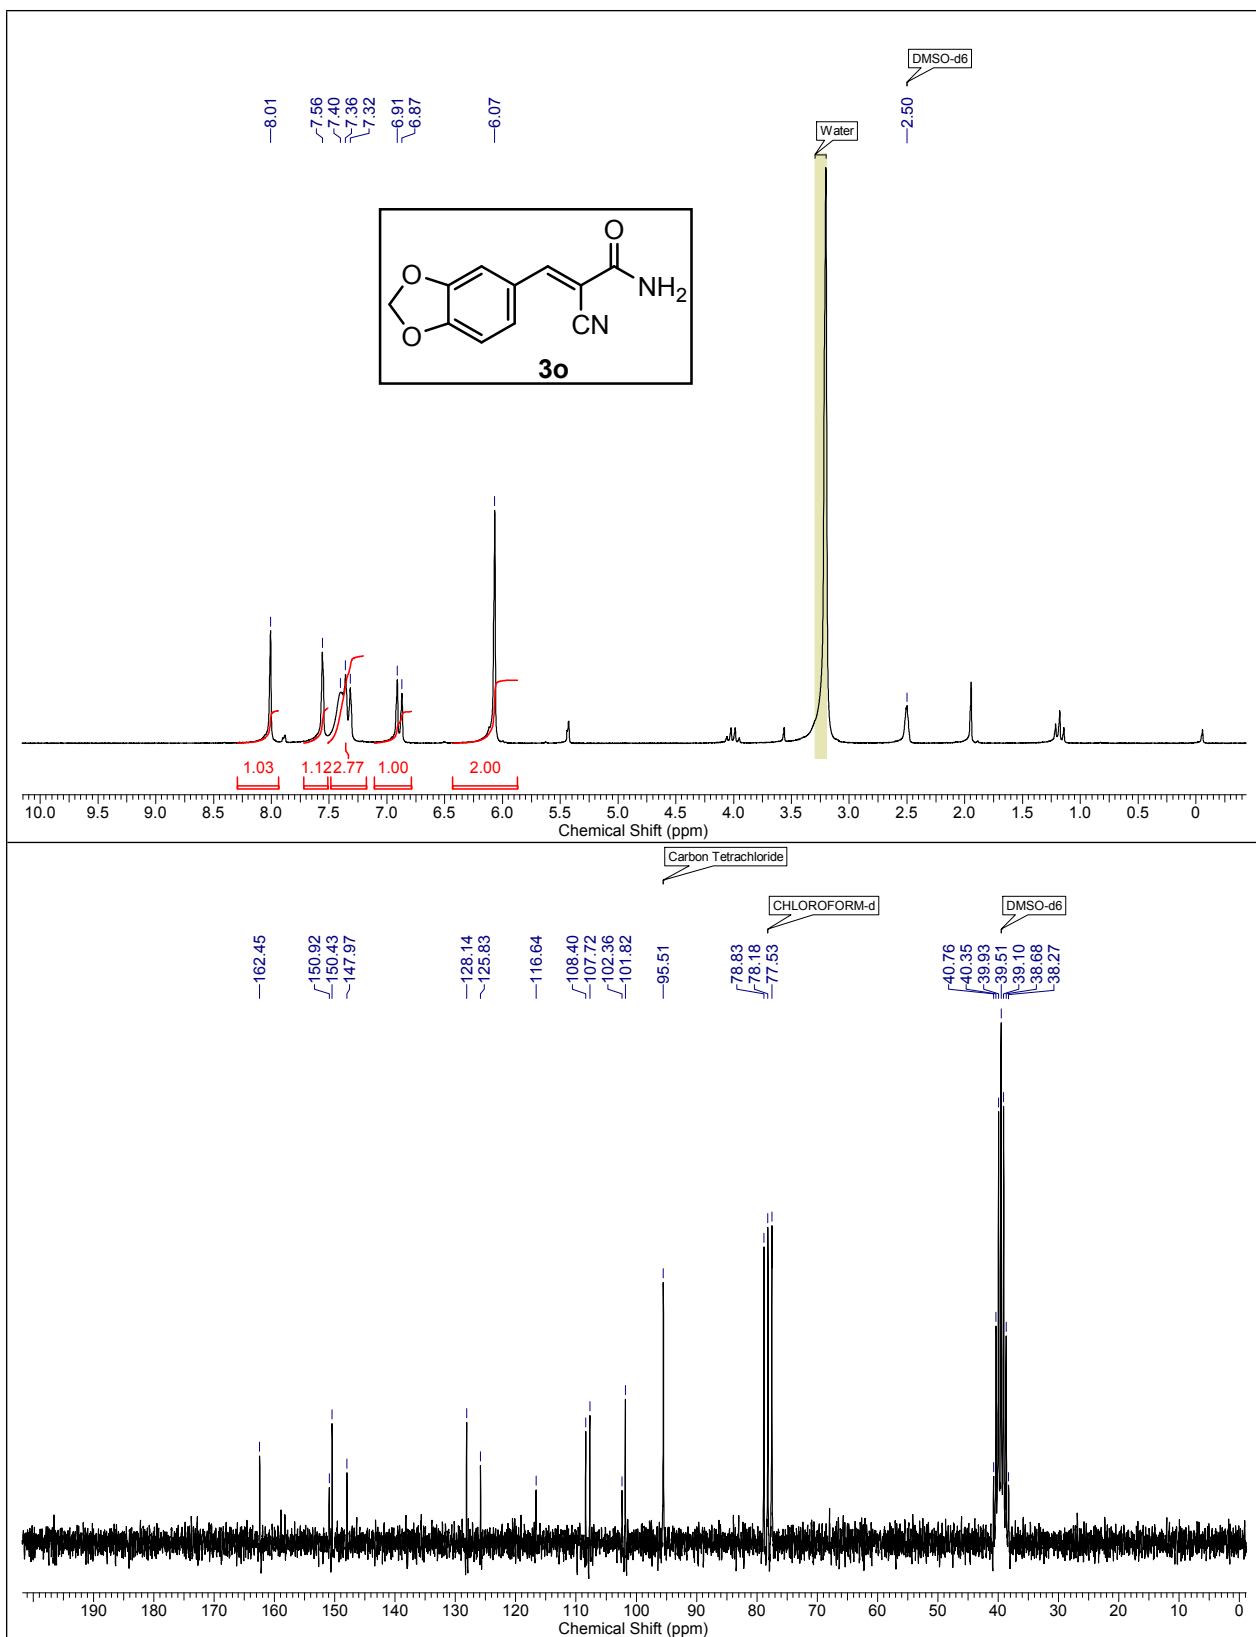

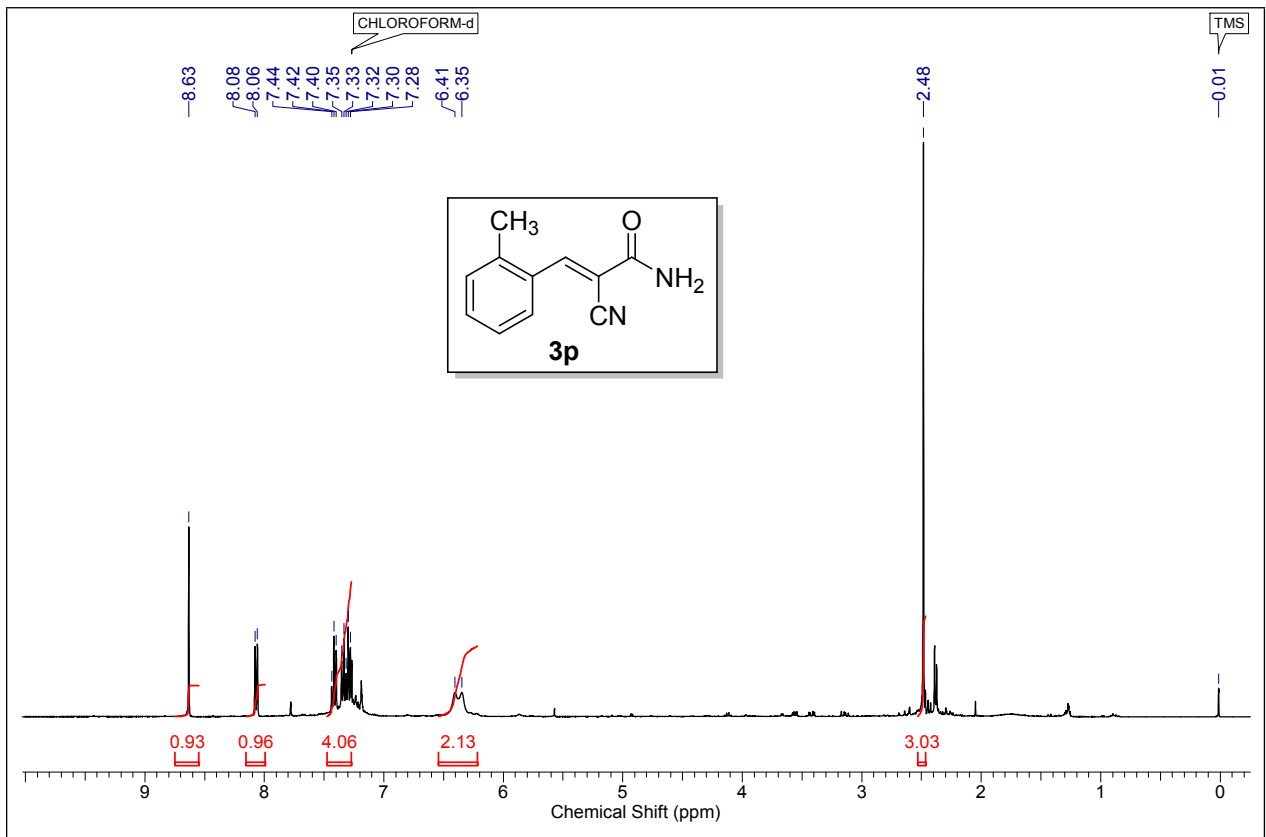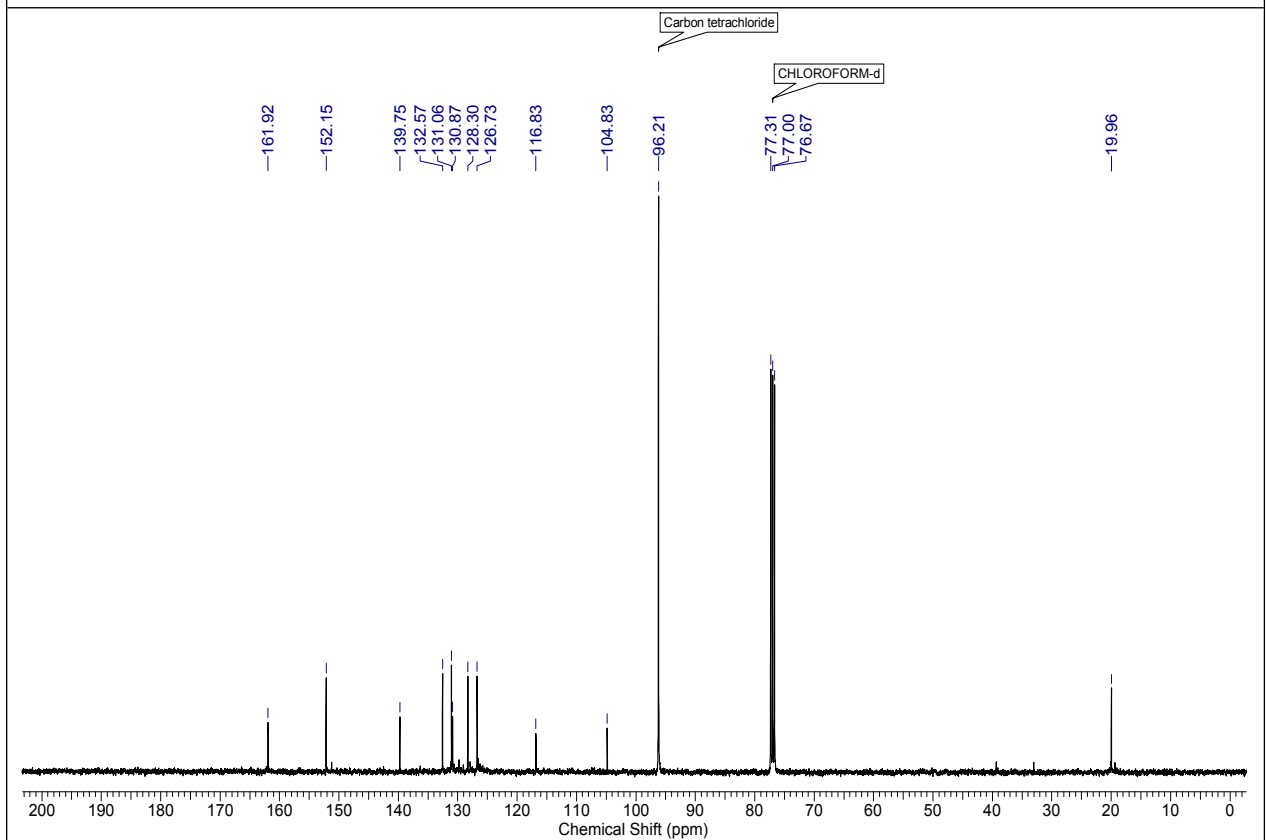

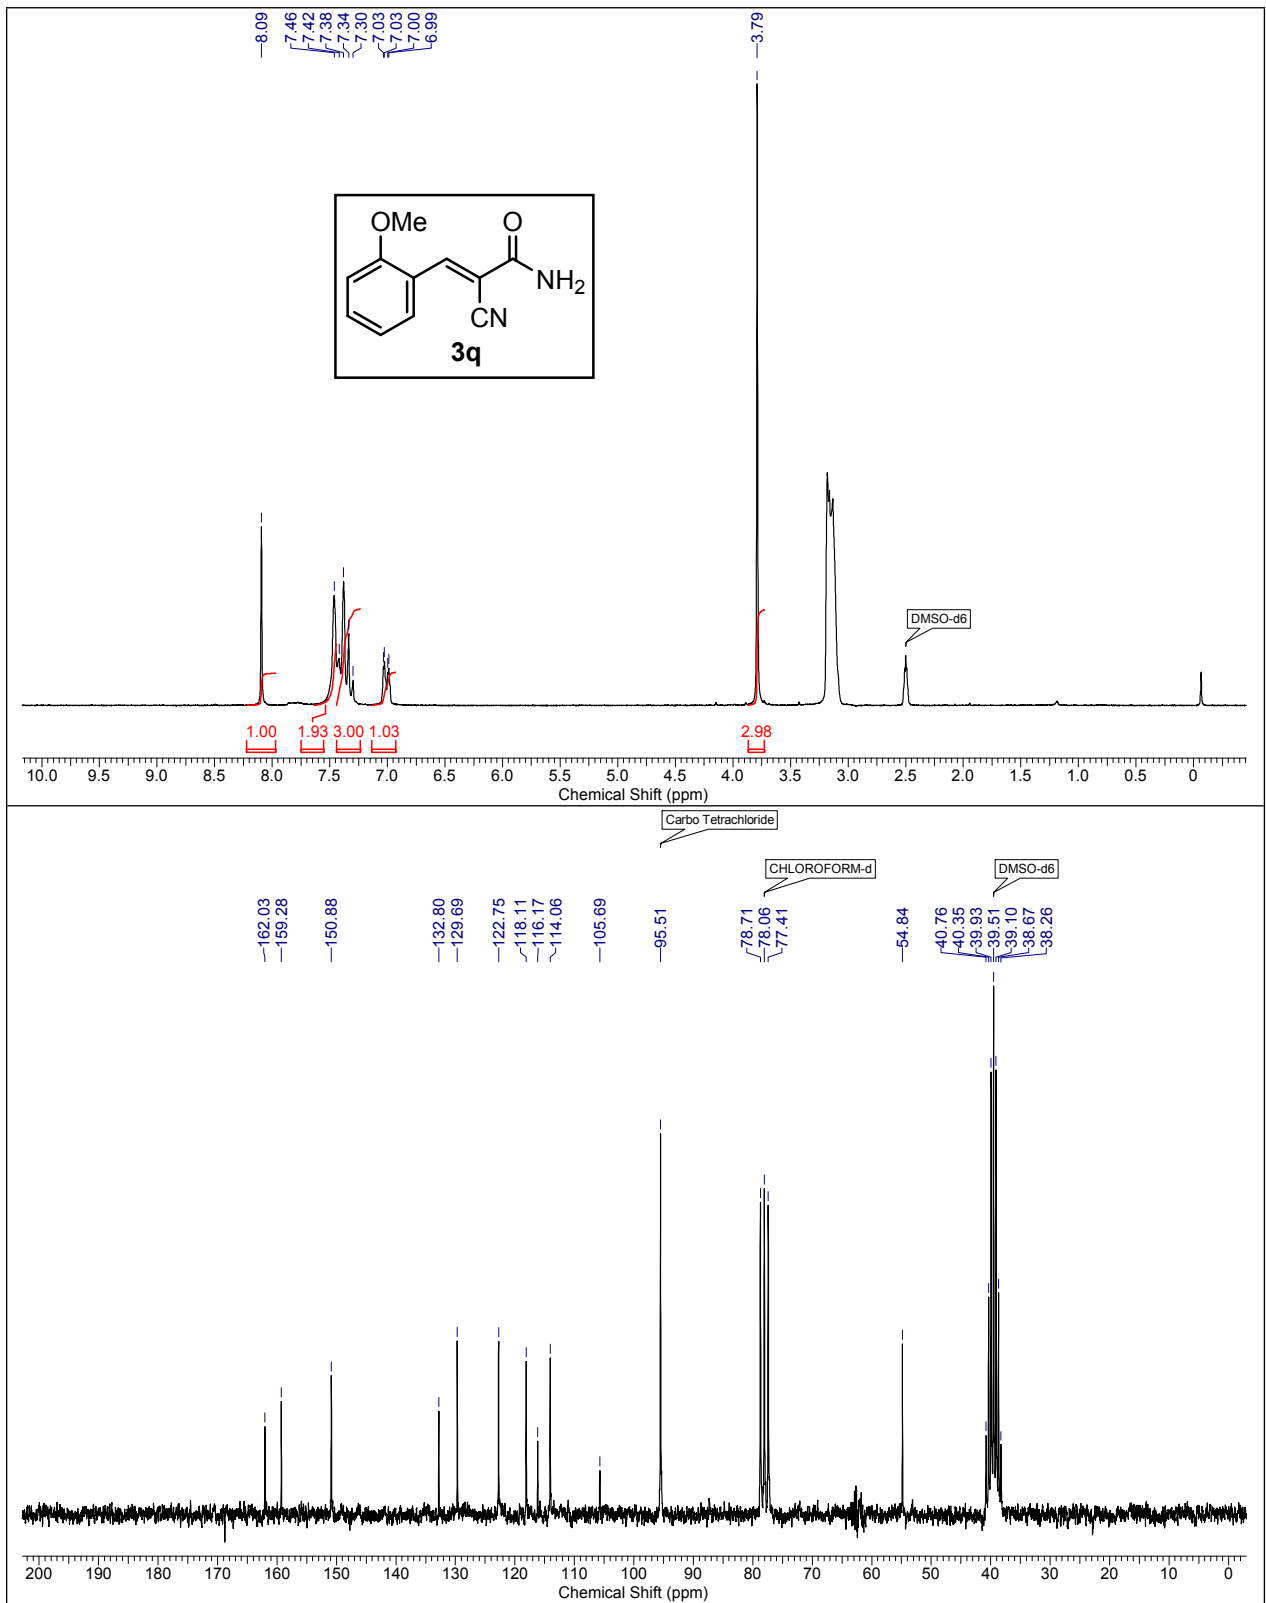

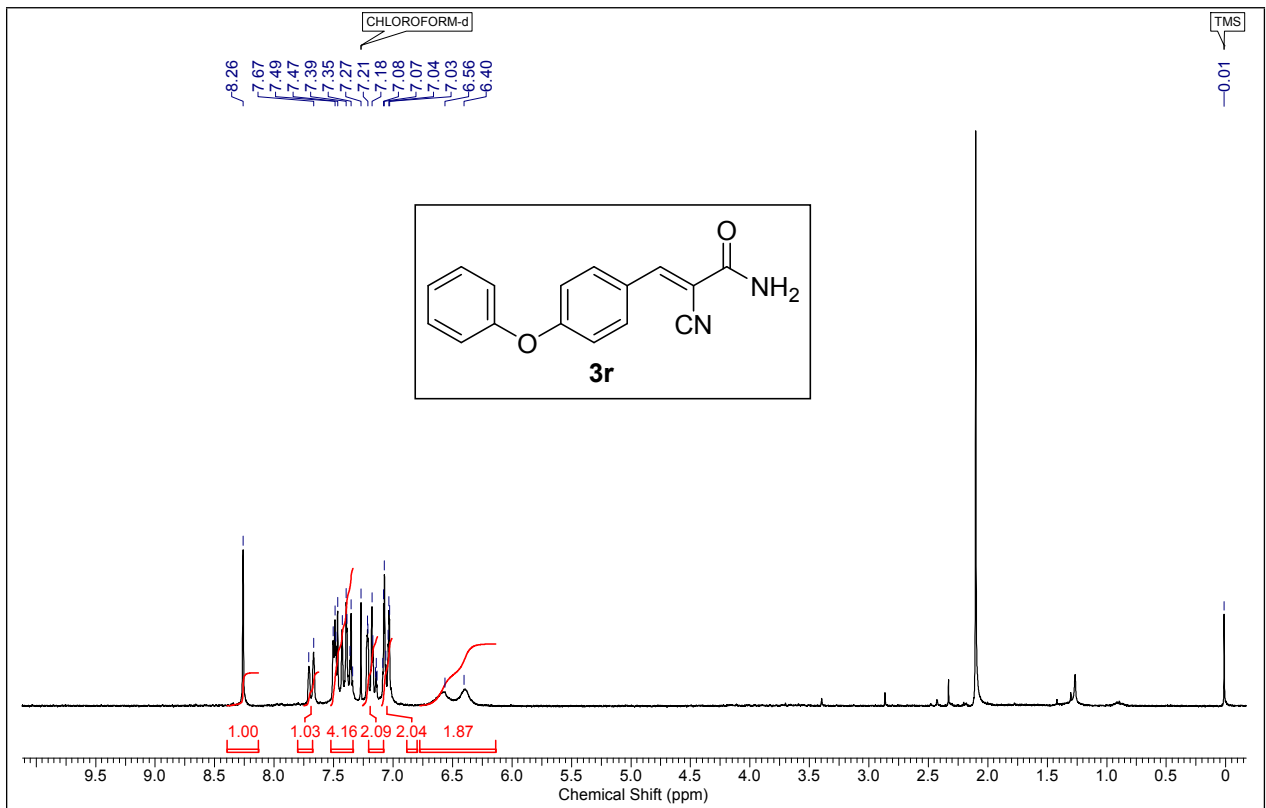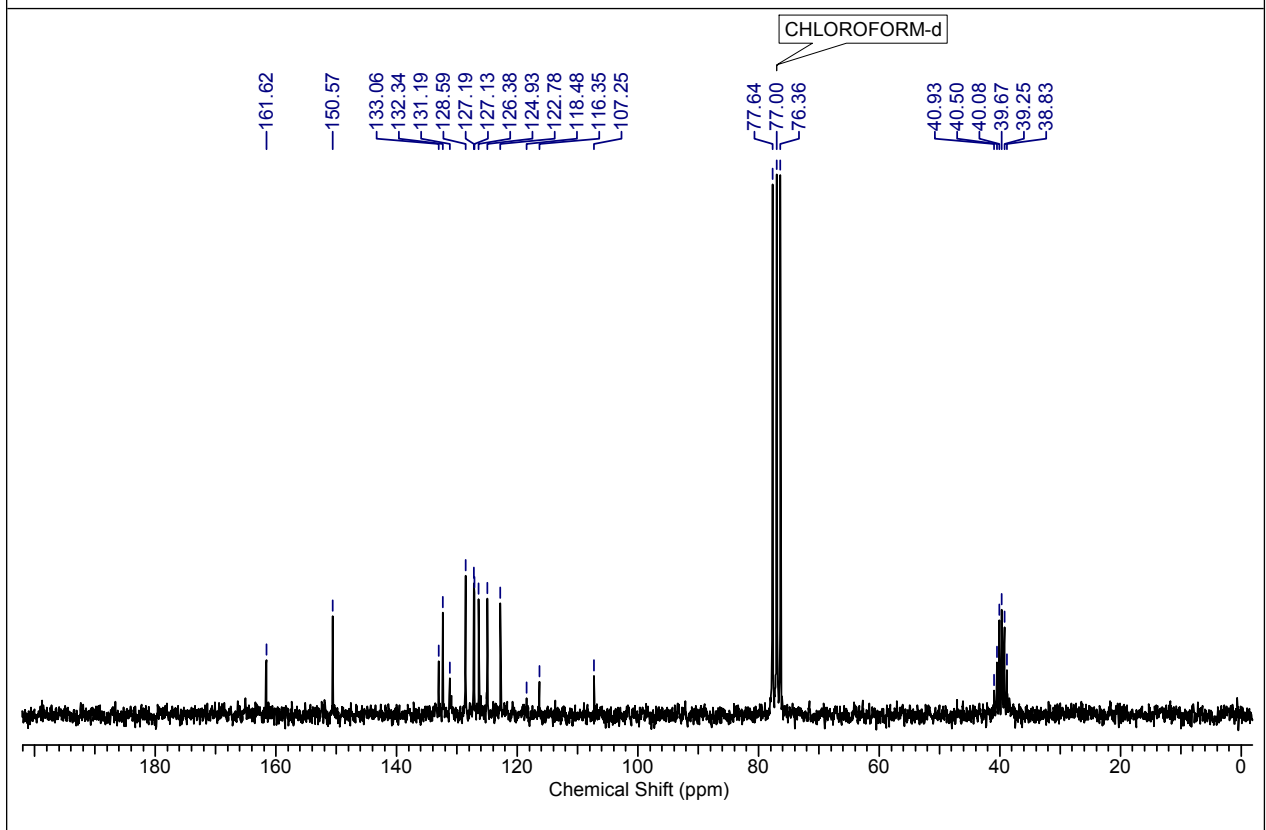

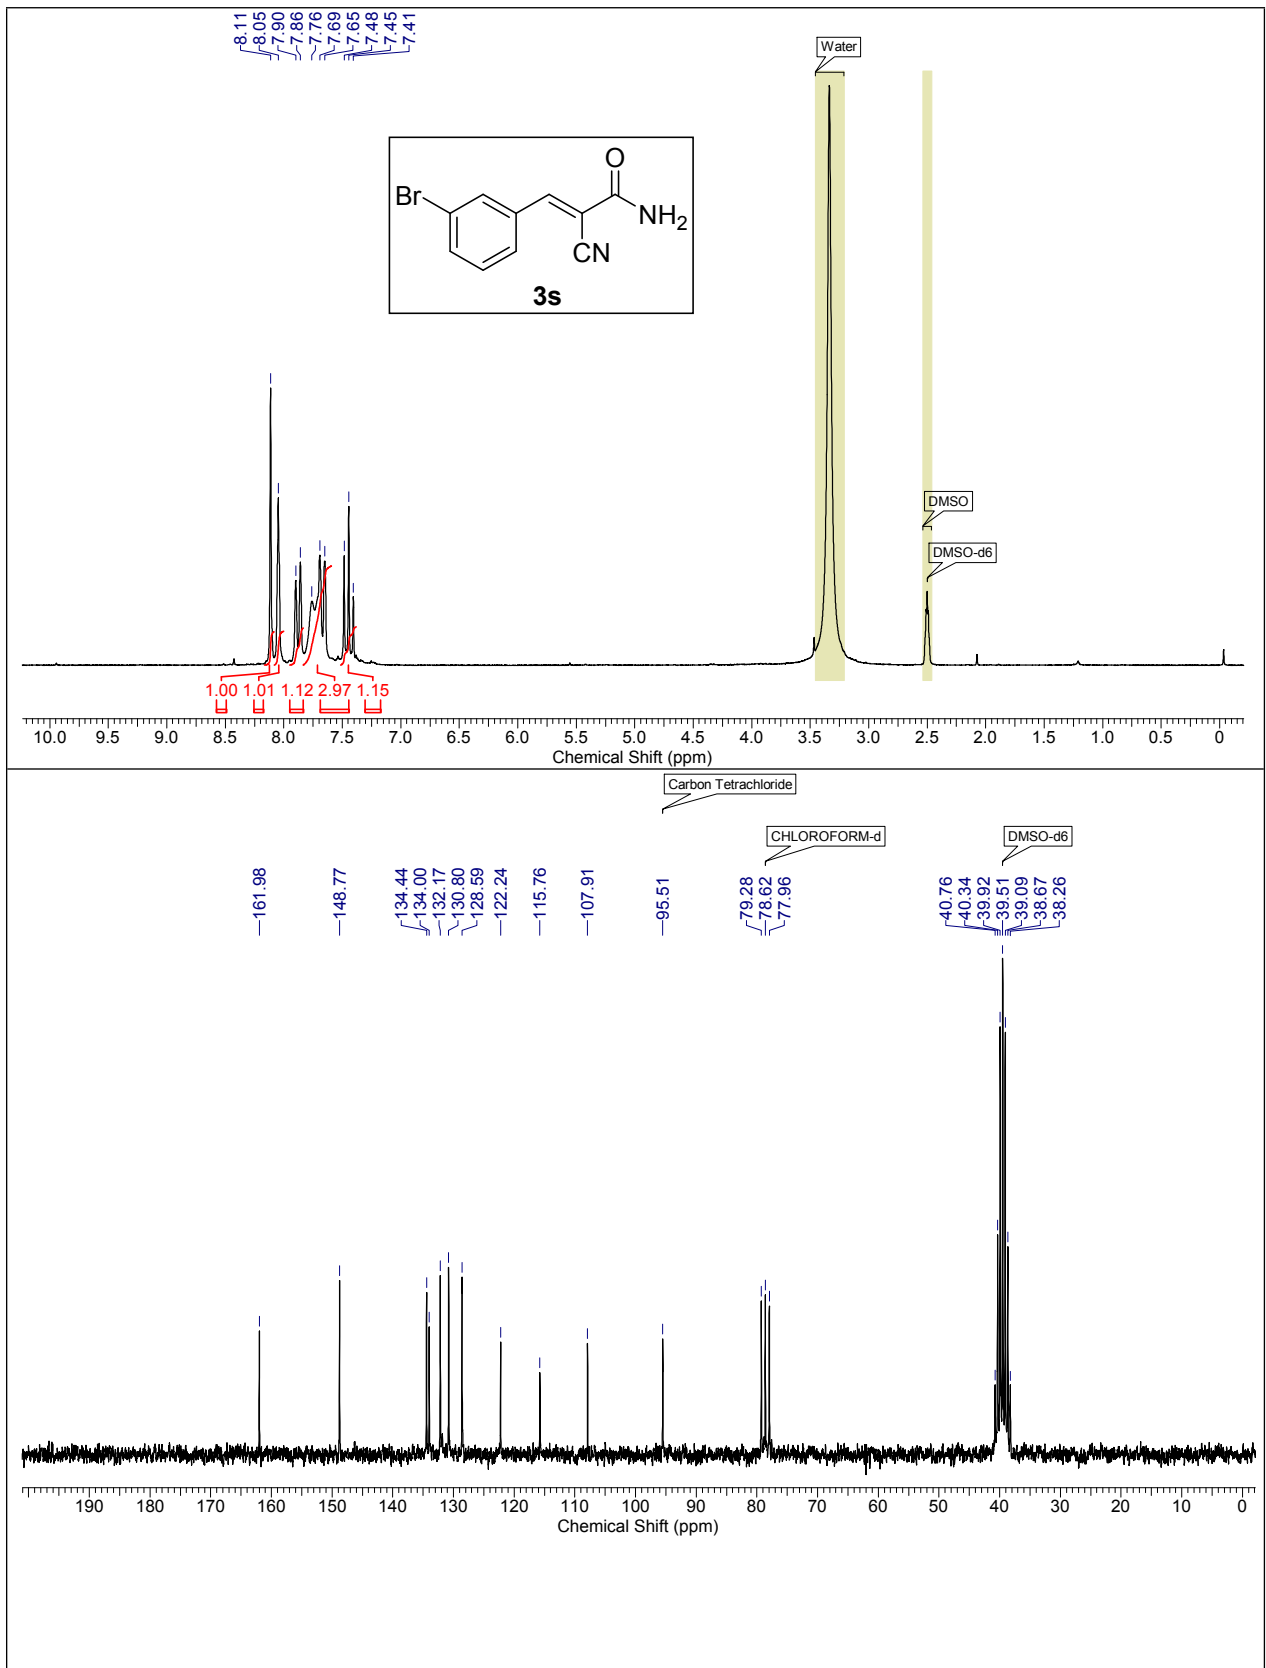



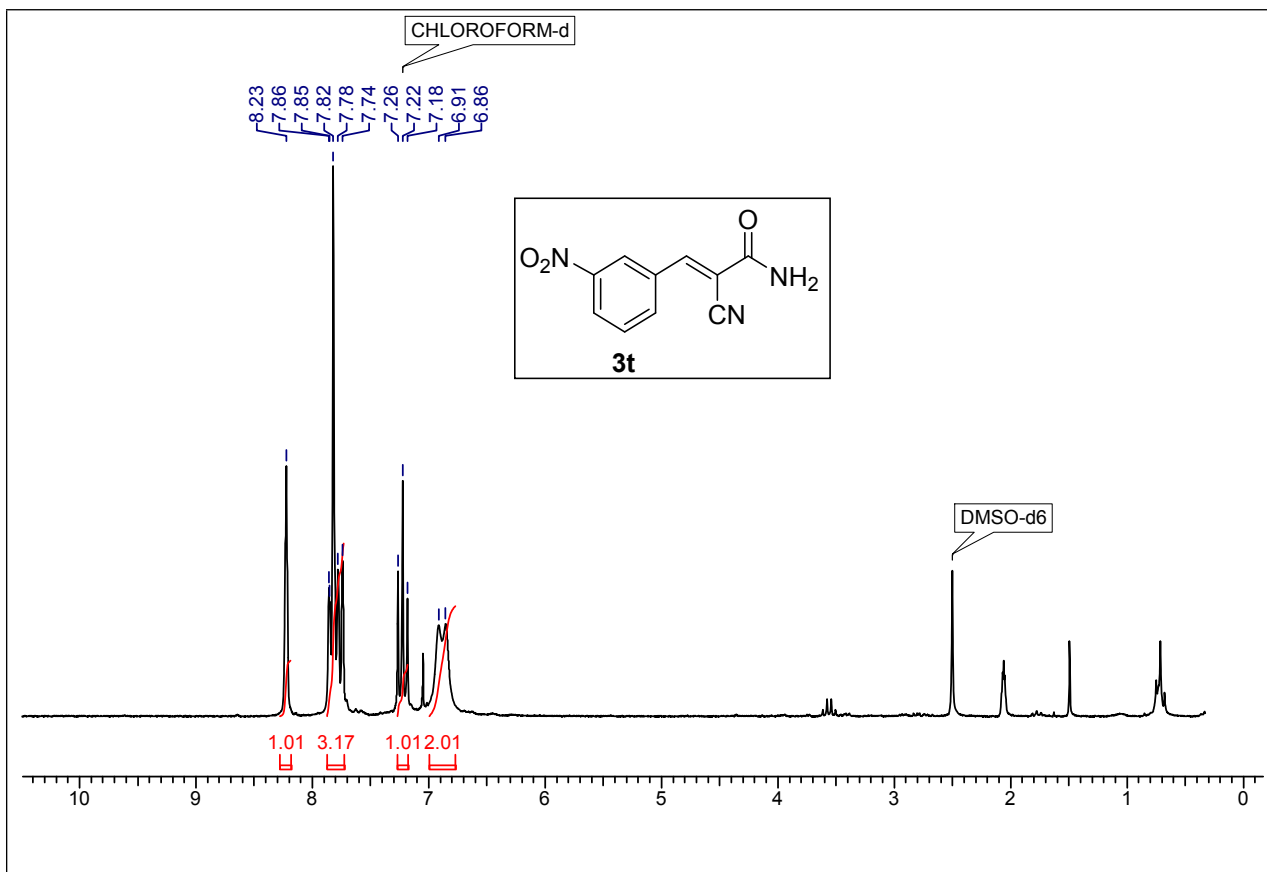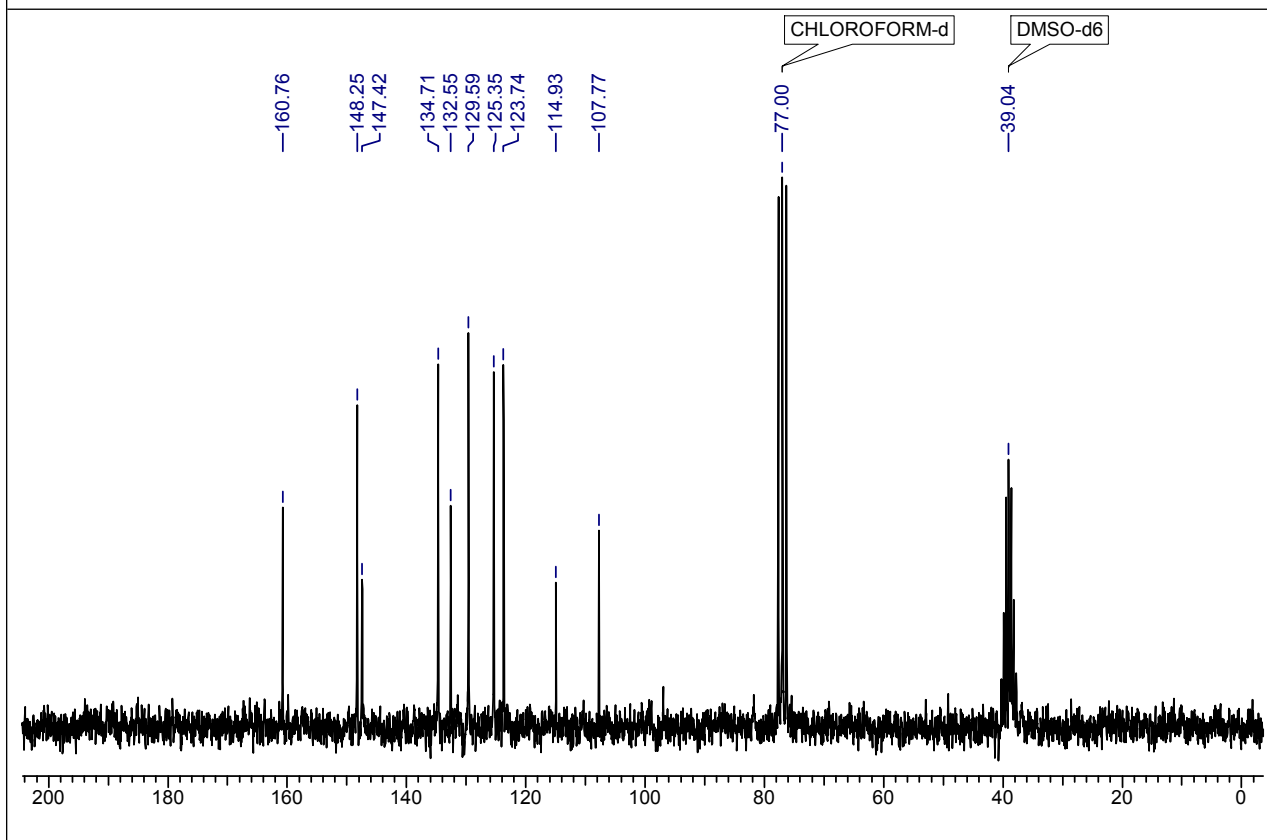

20180212-150547-11772.003.001.1r.esp

DMSO-d6

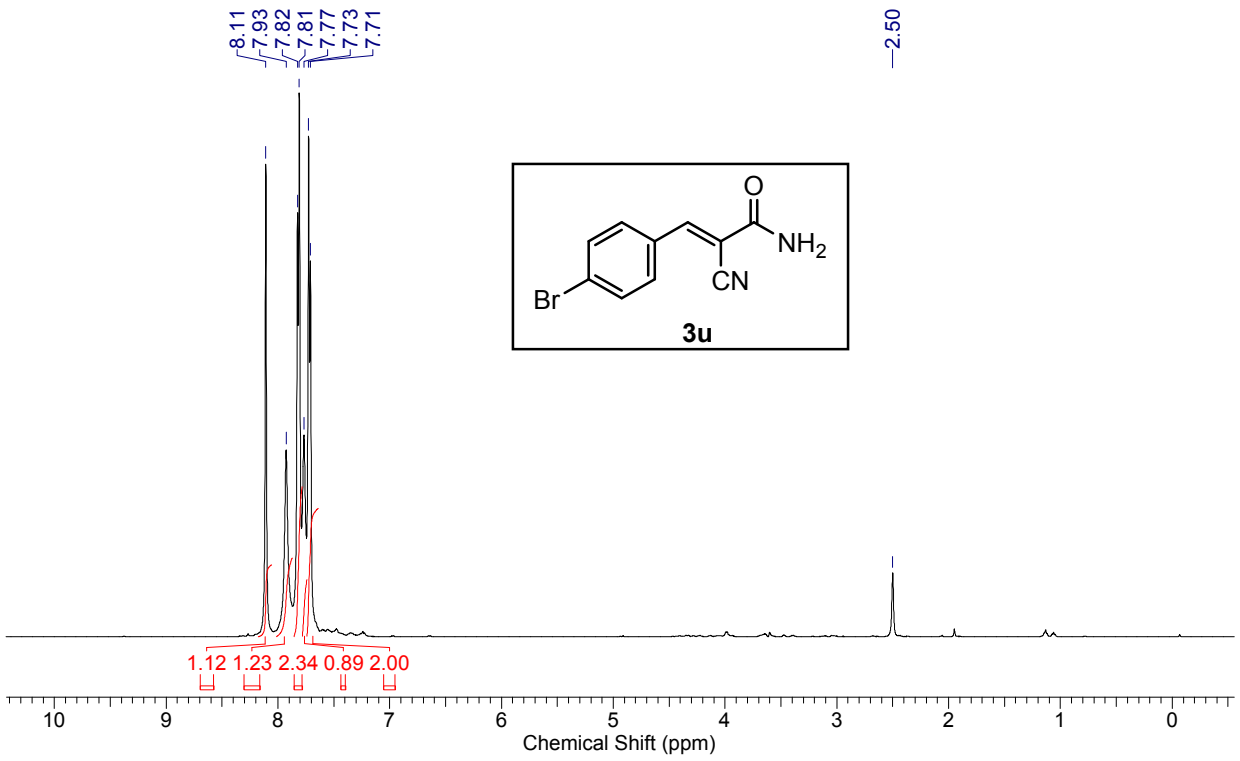

20180212-150547-11772.002.001.1r.esp

DMSO-d6

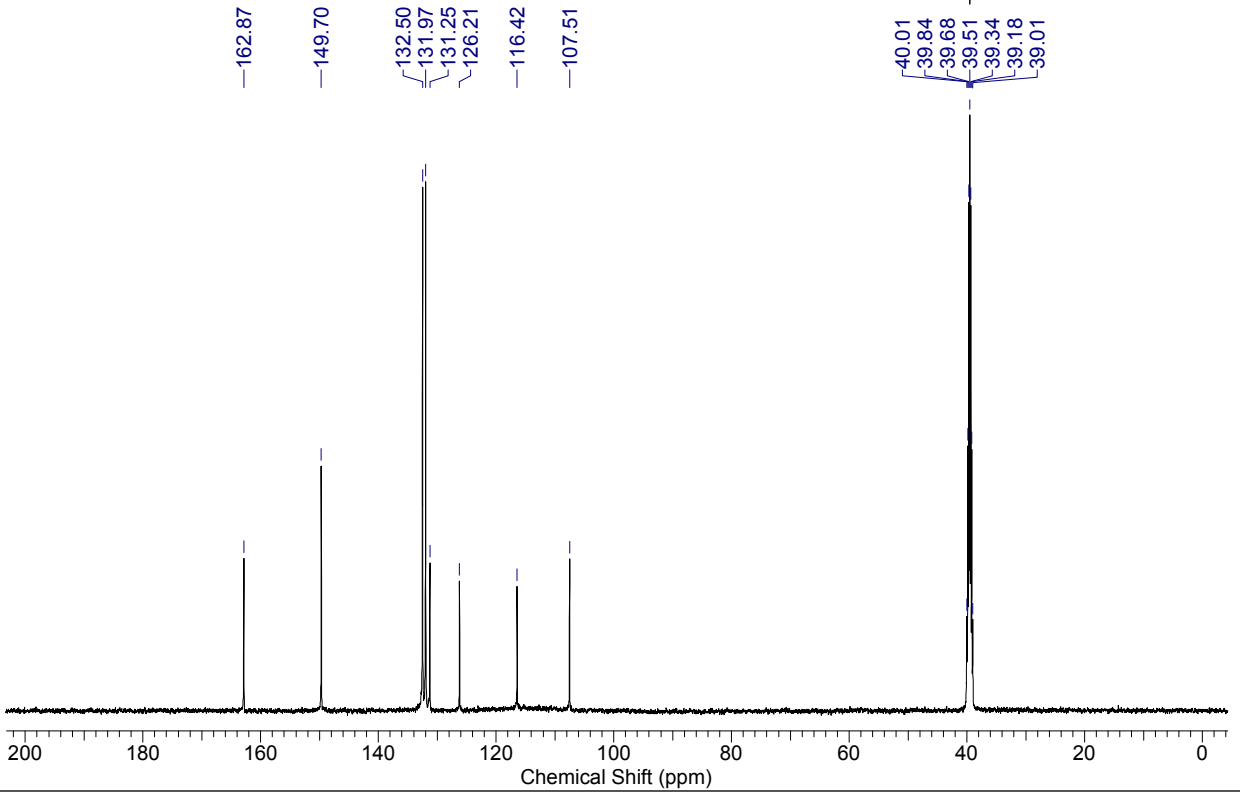

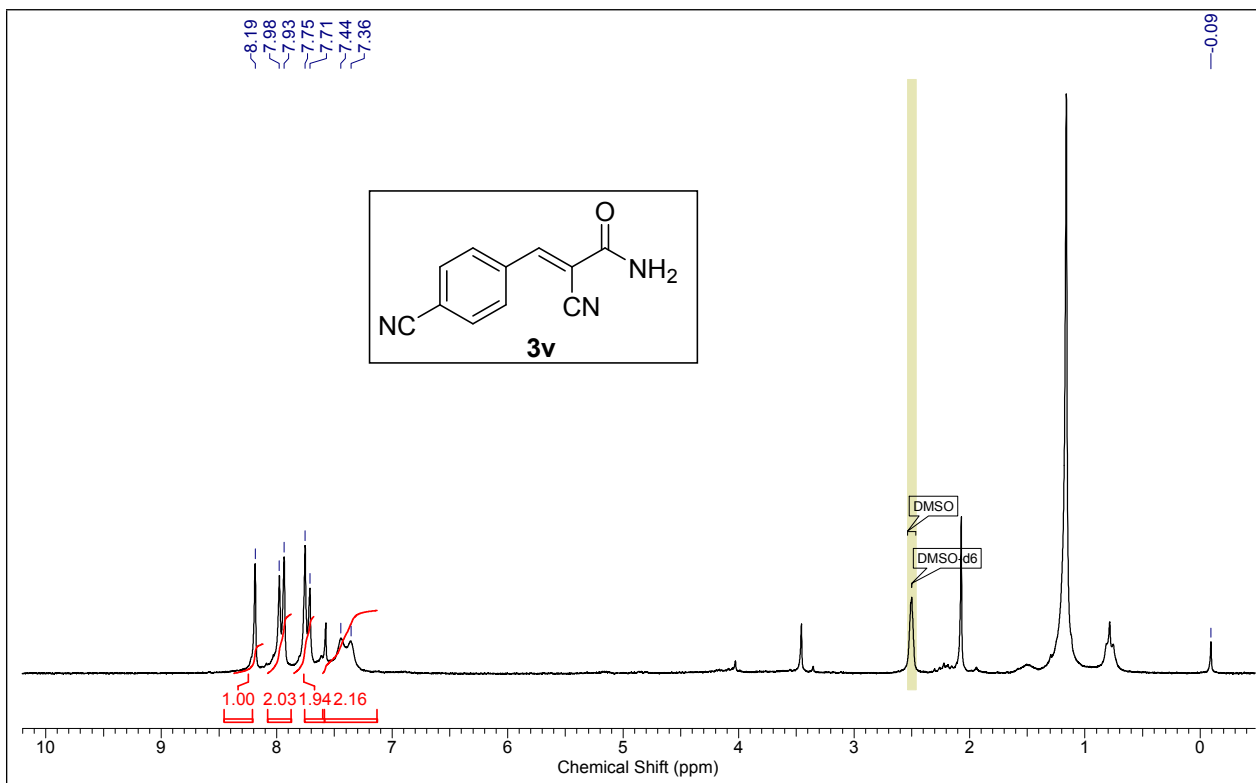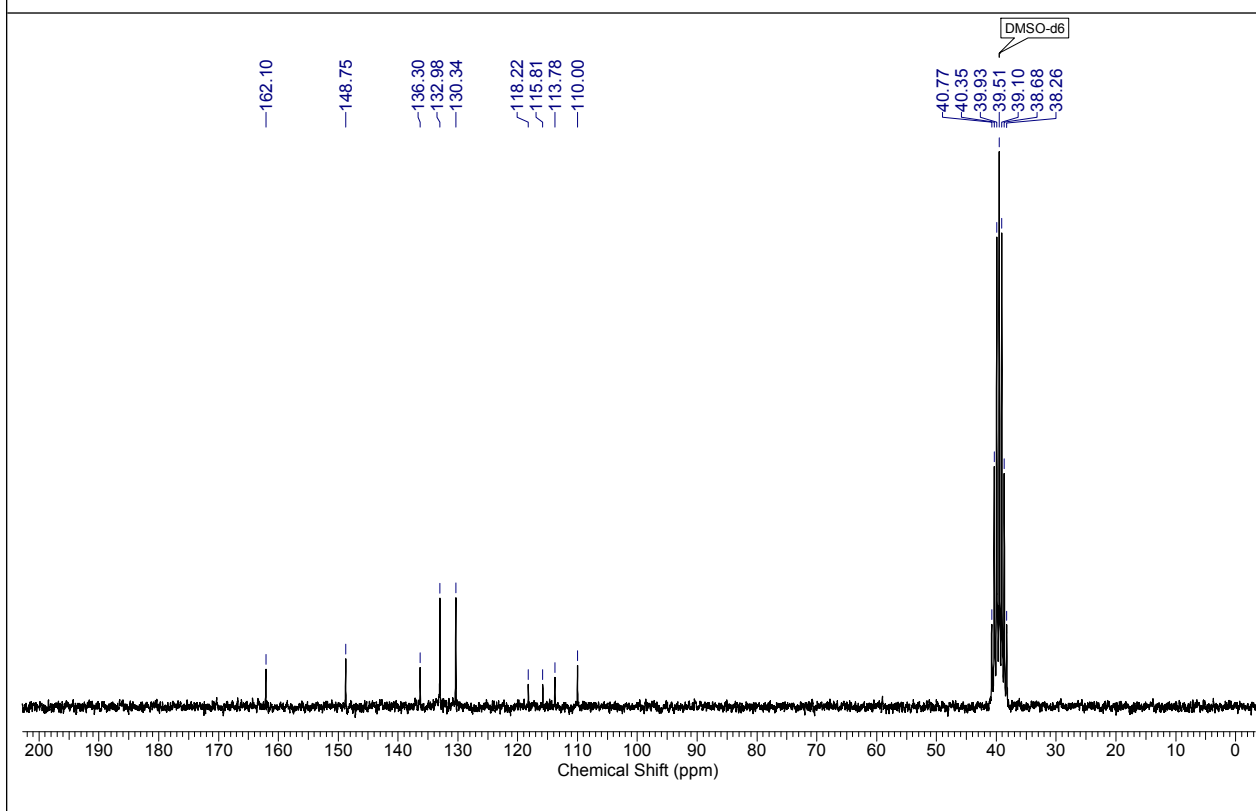

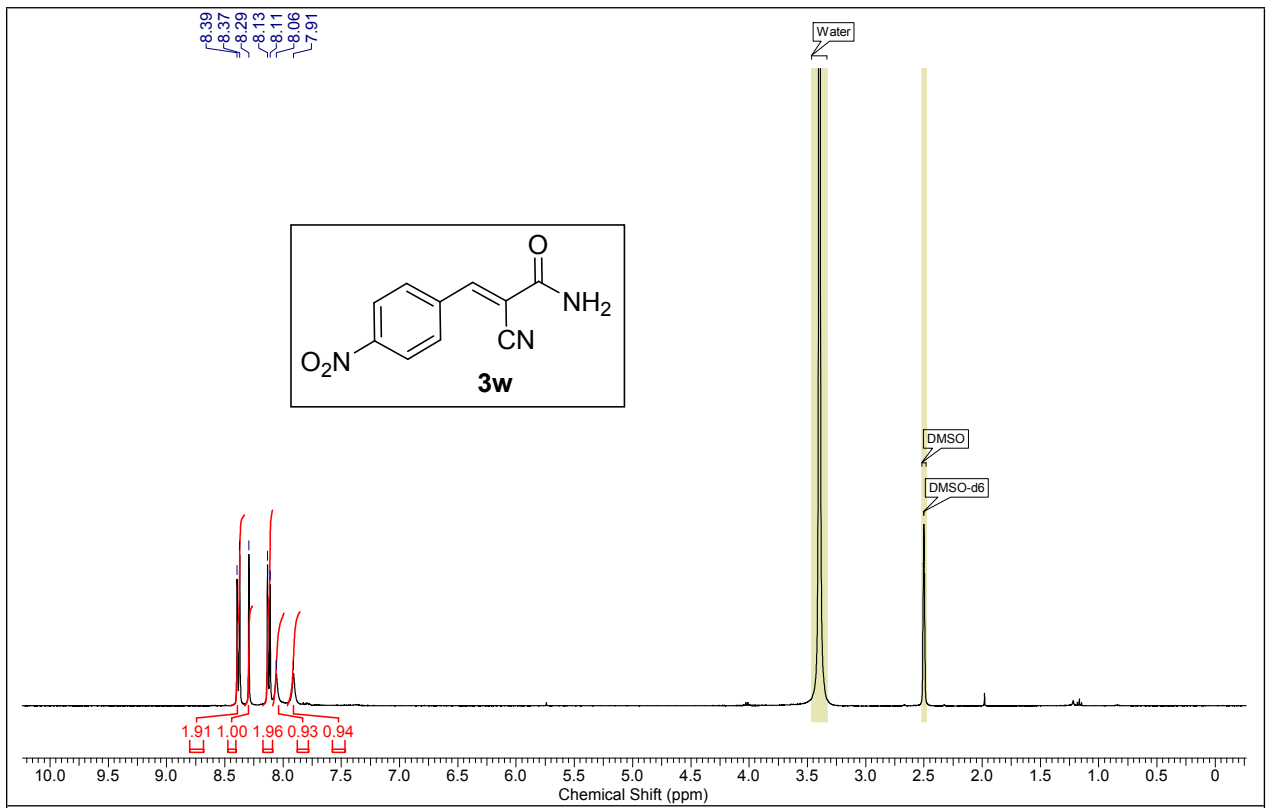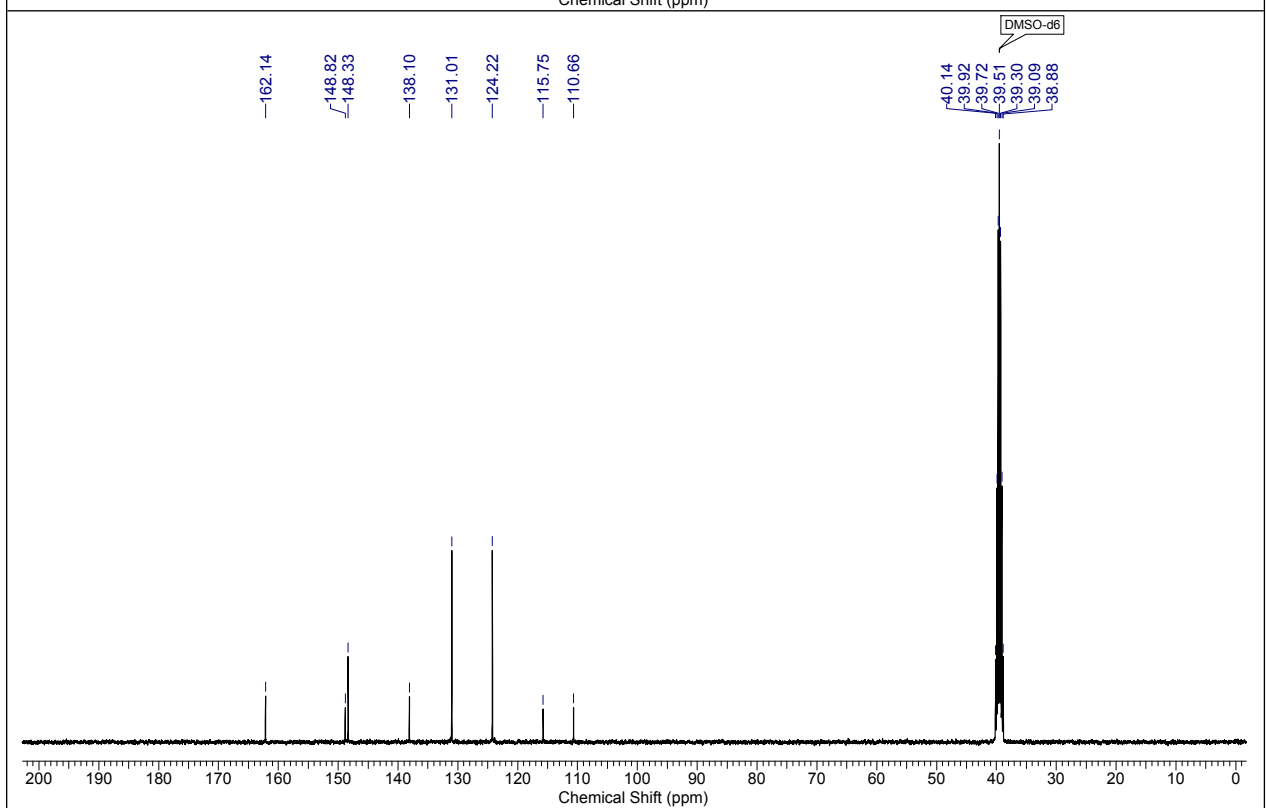

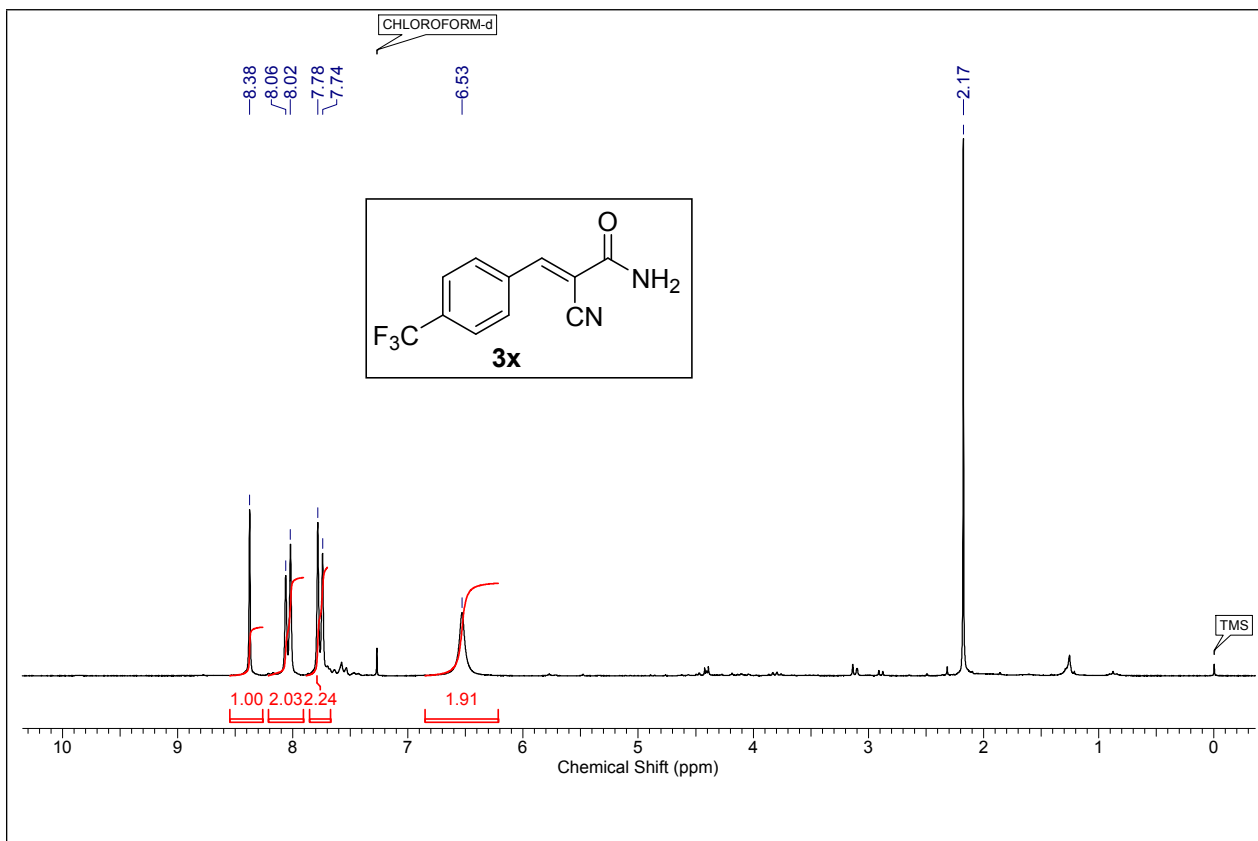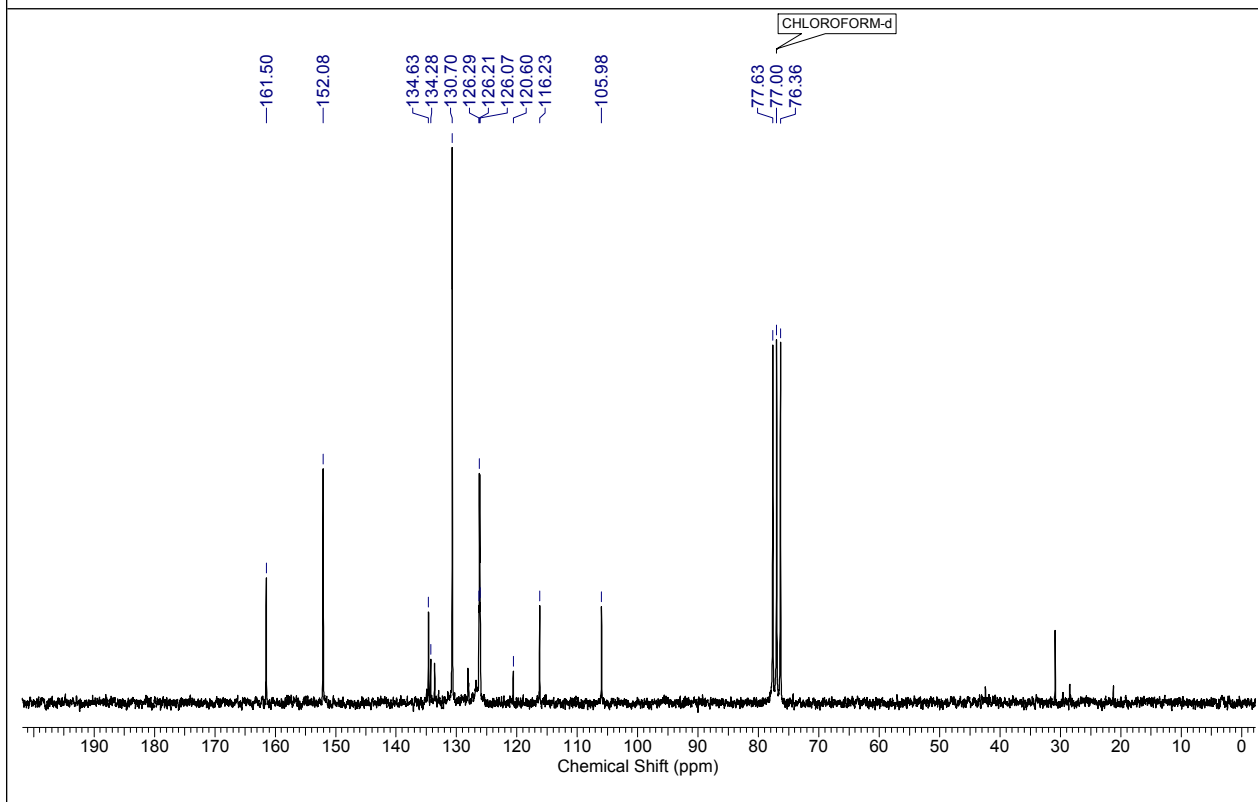

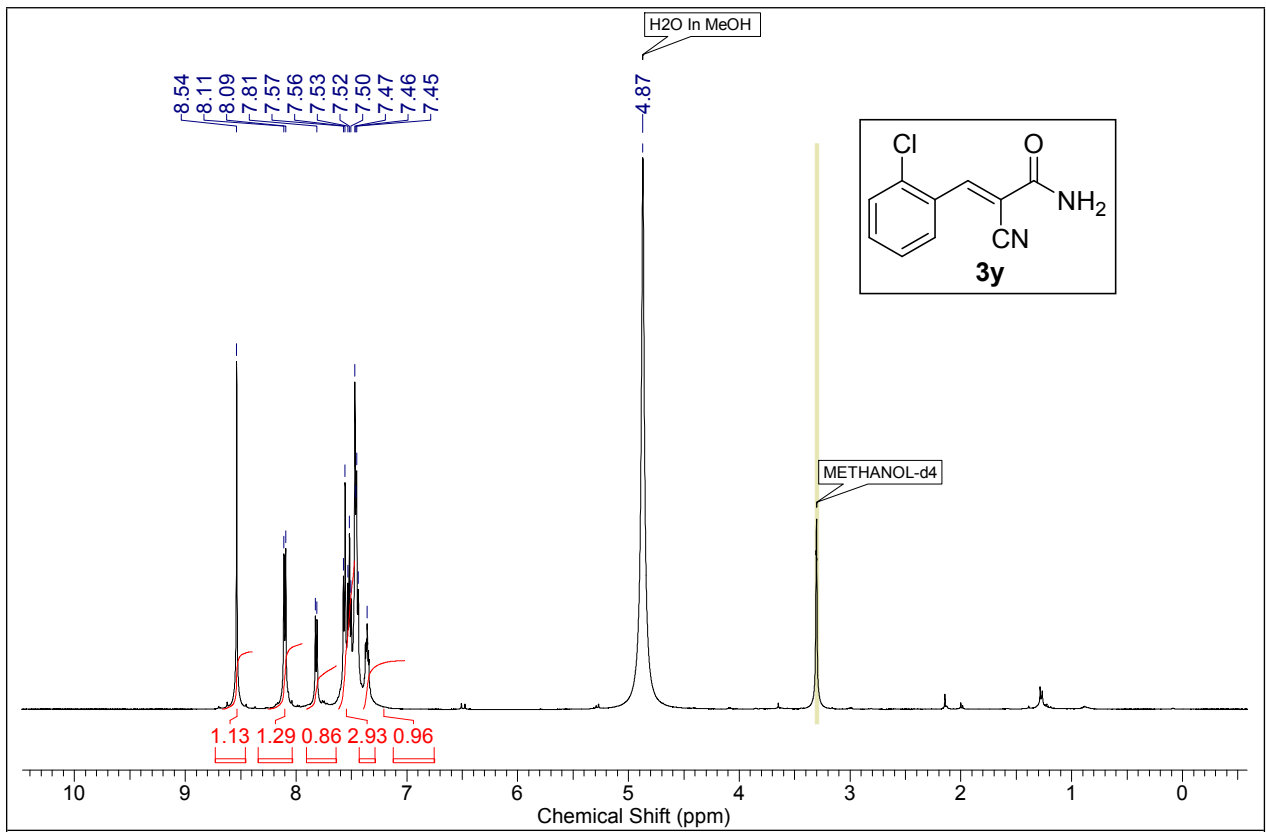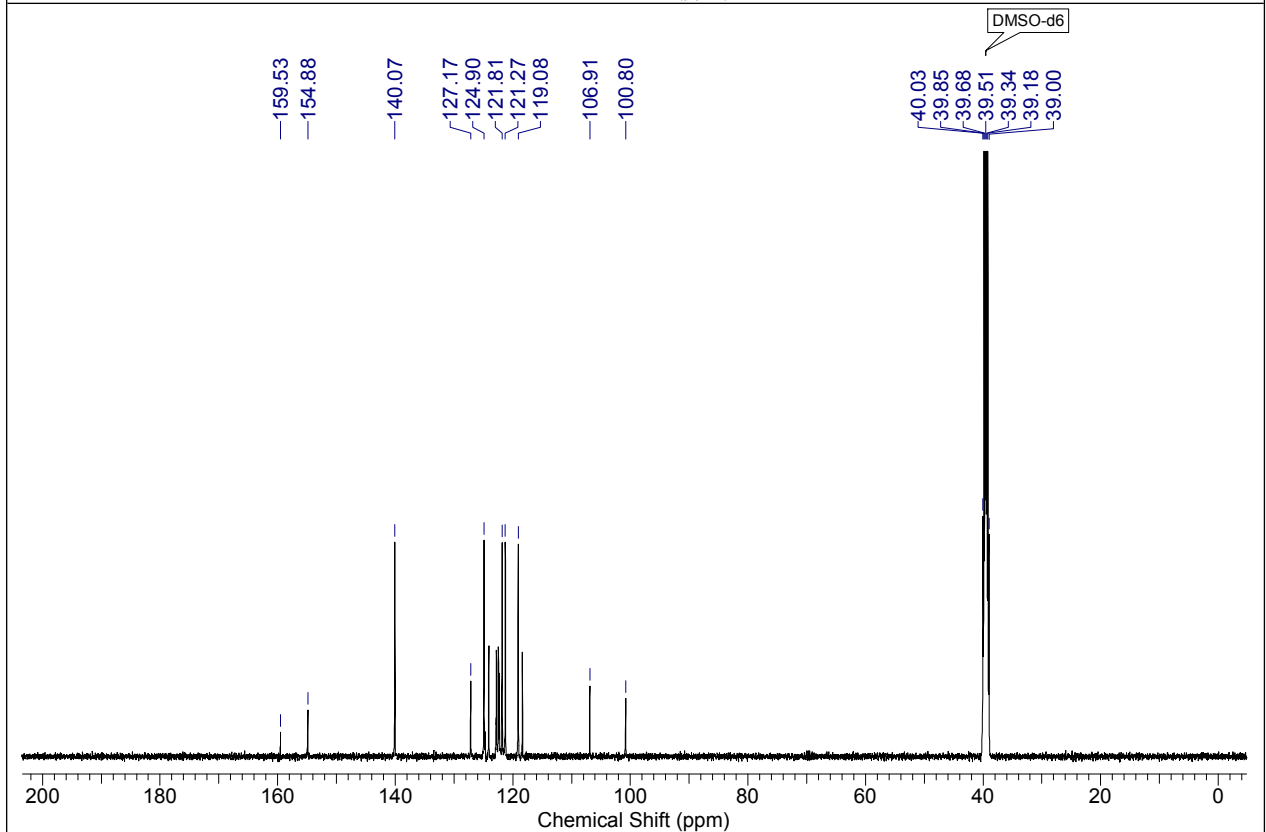

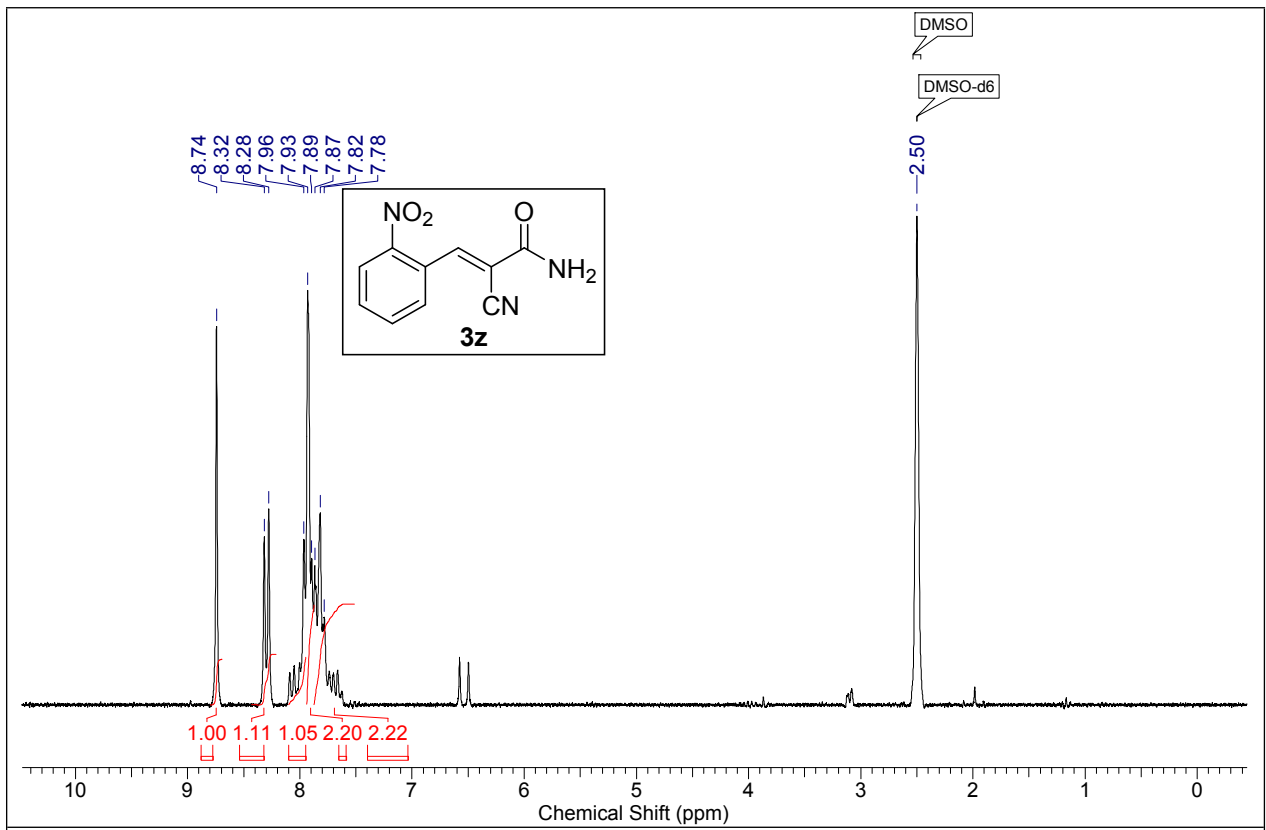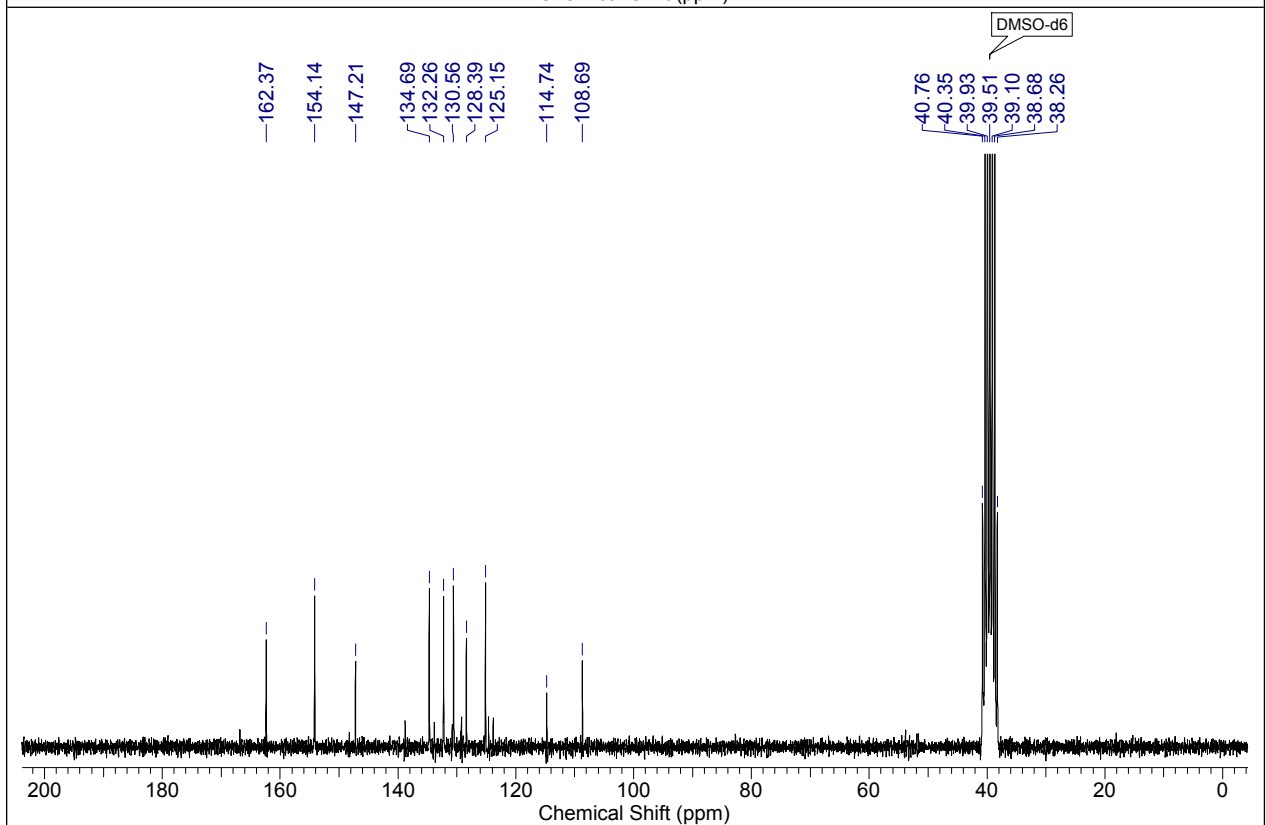

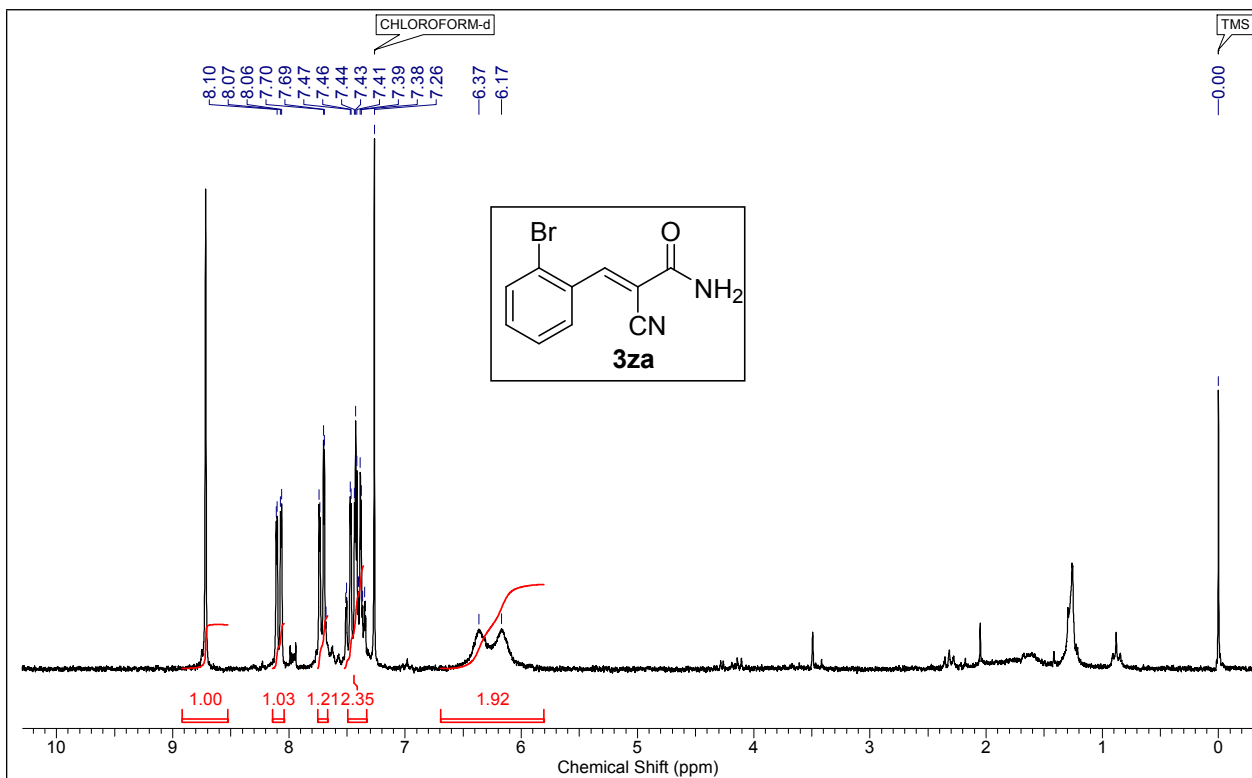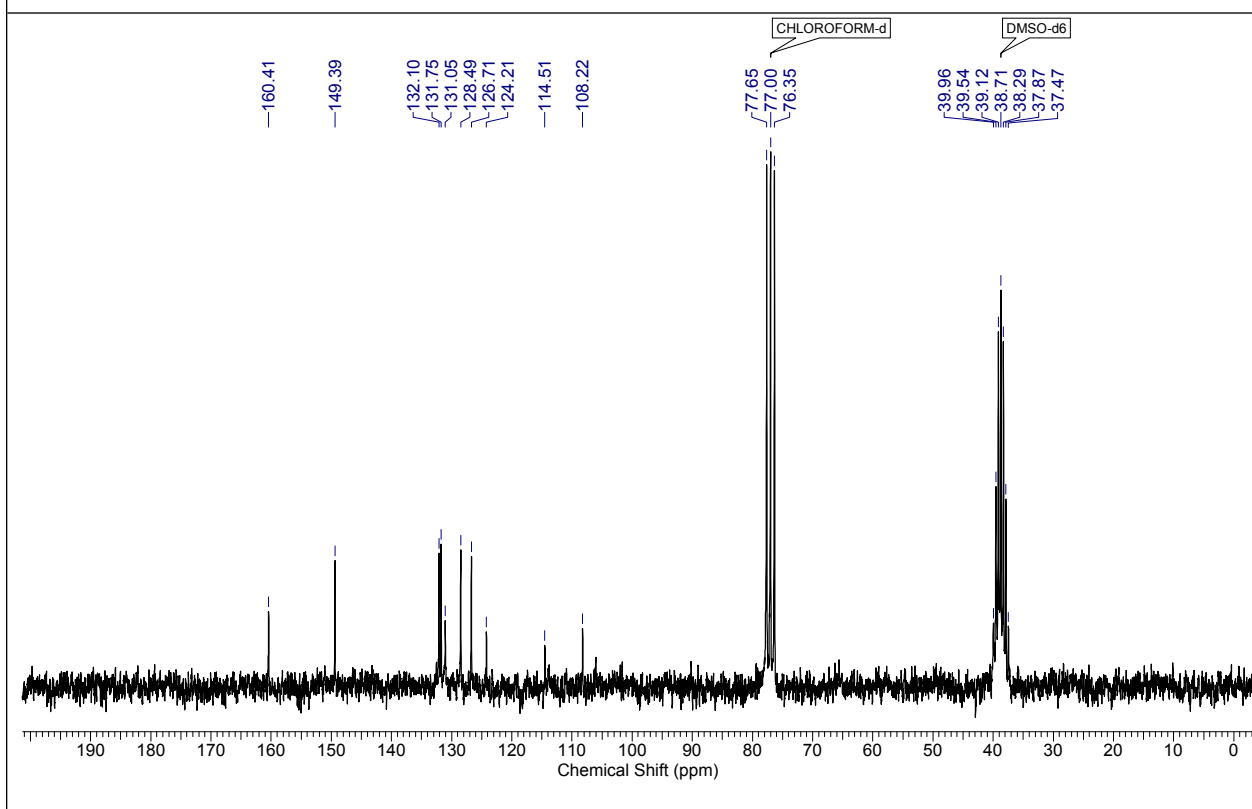



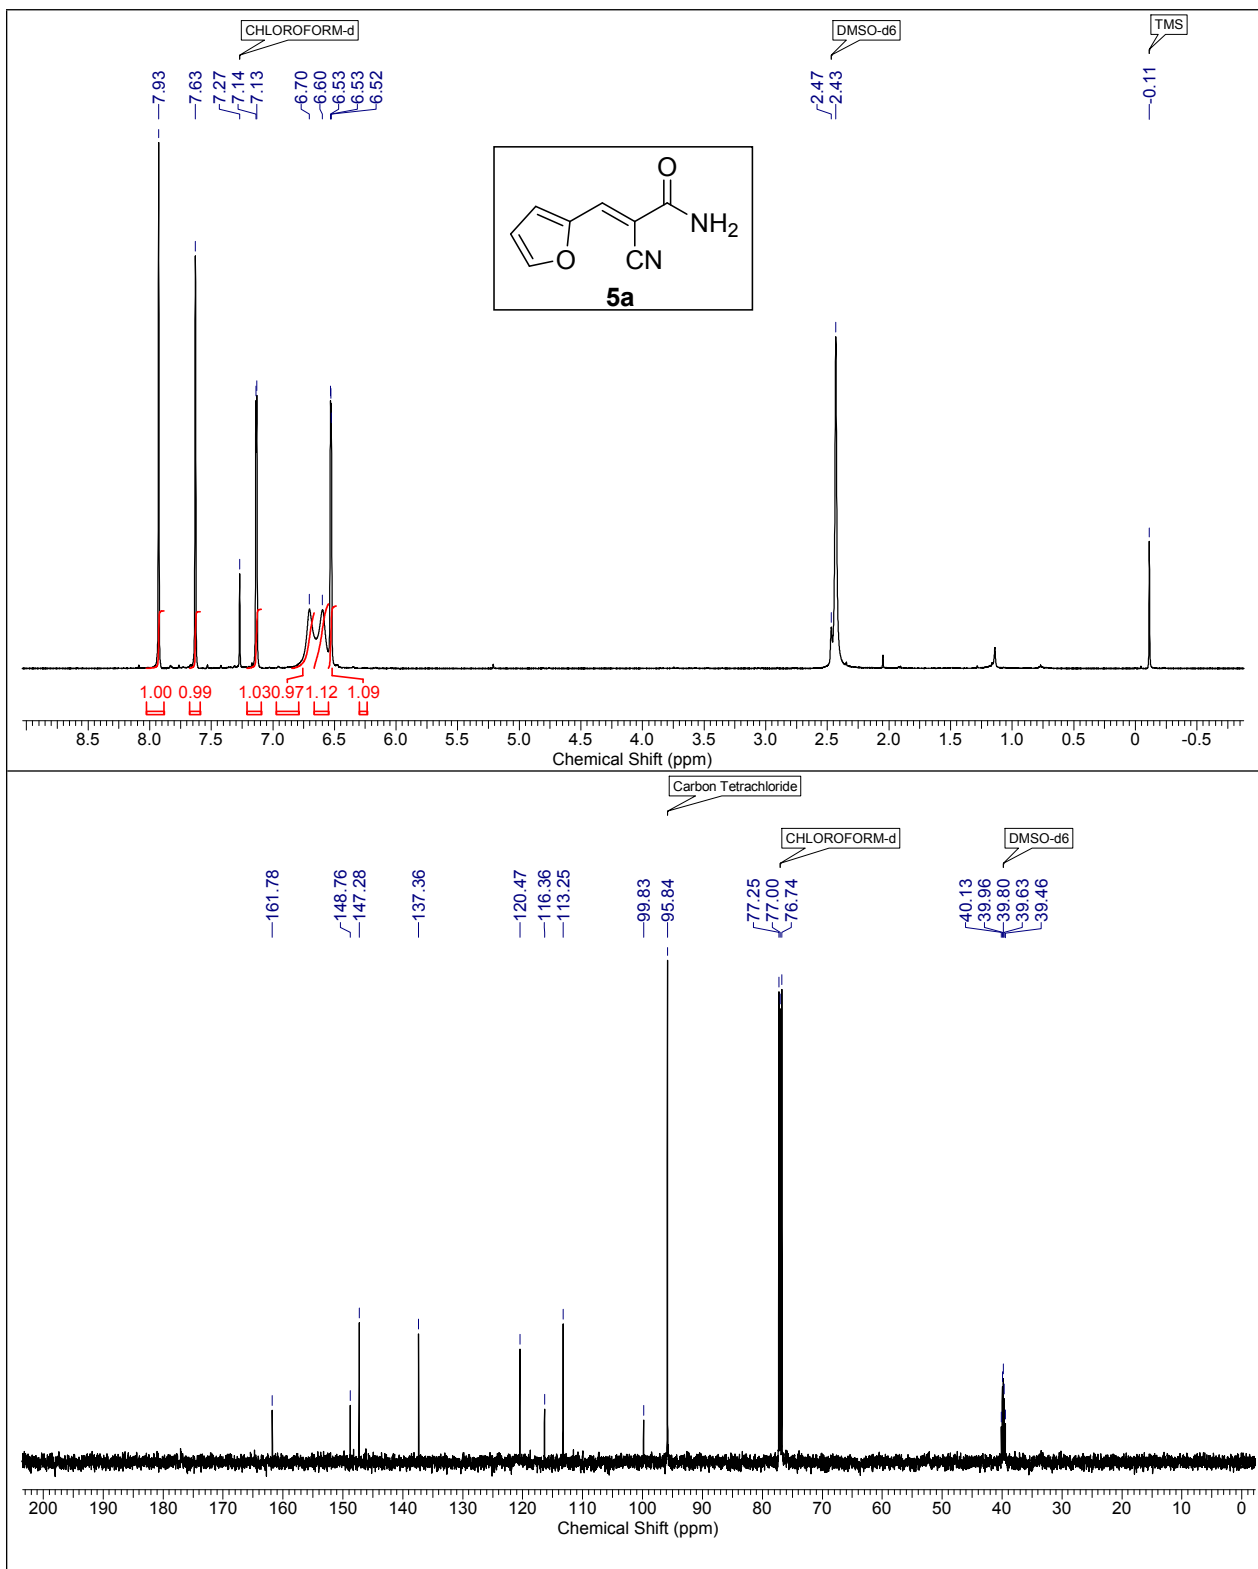

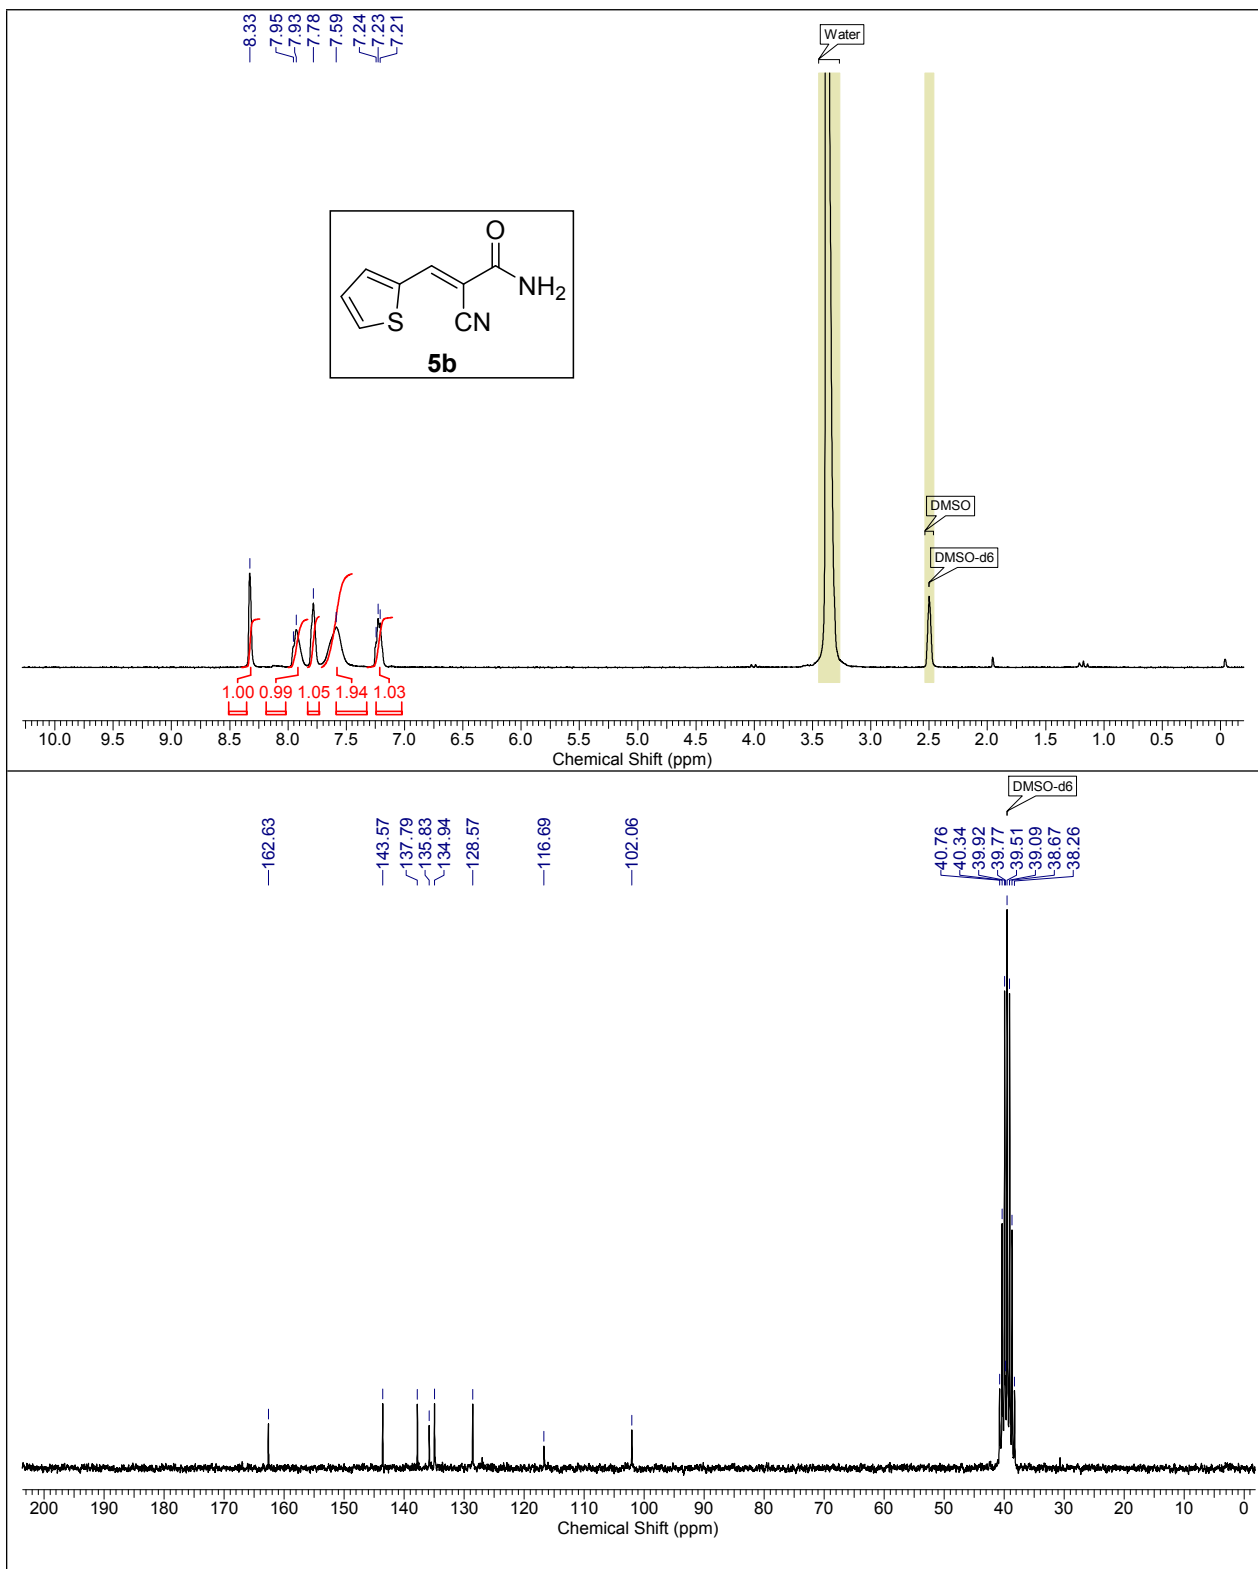

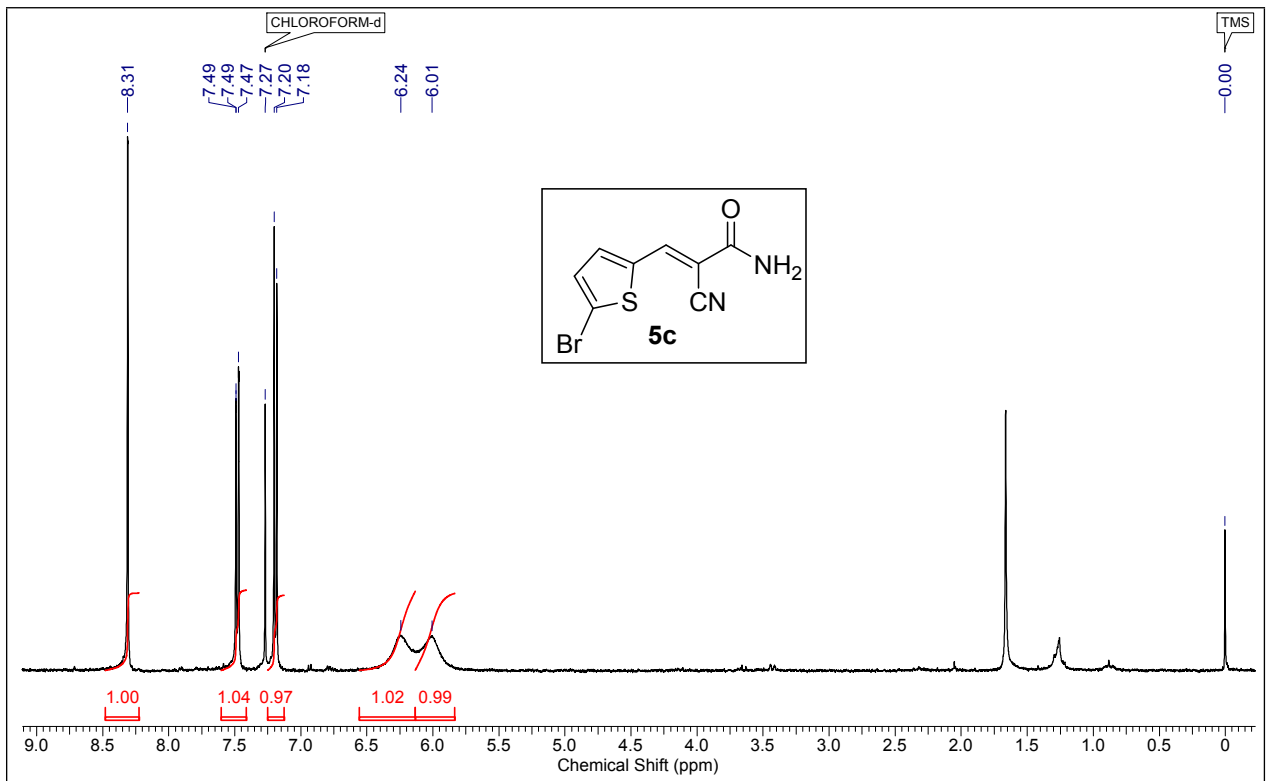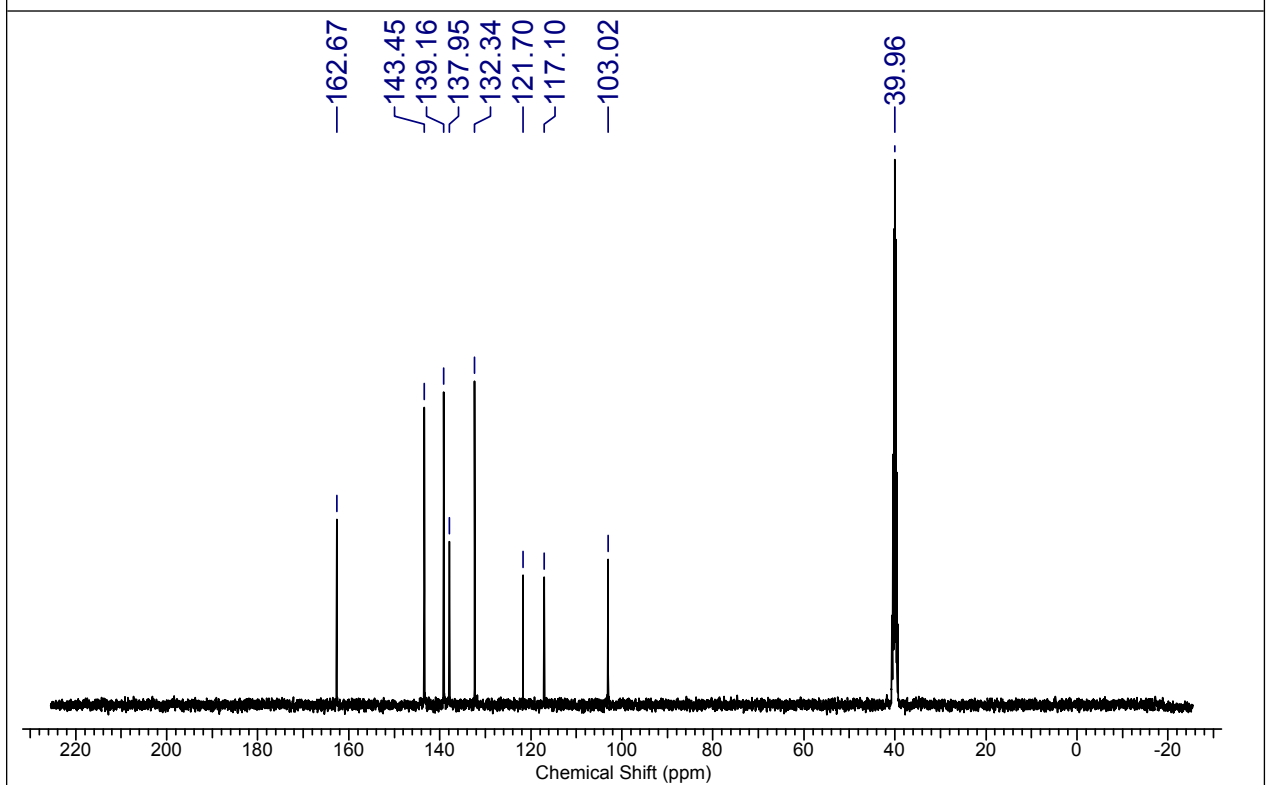

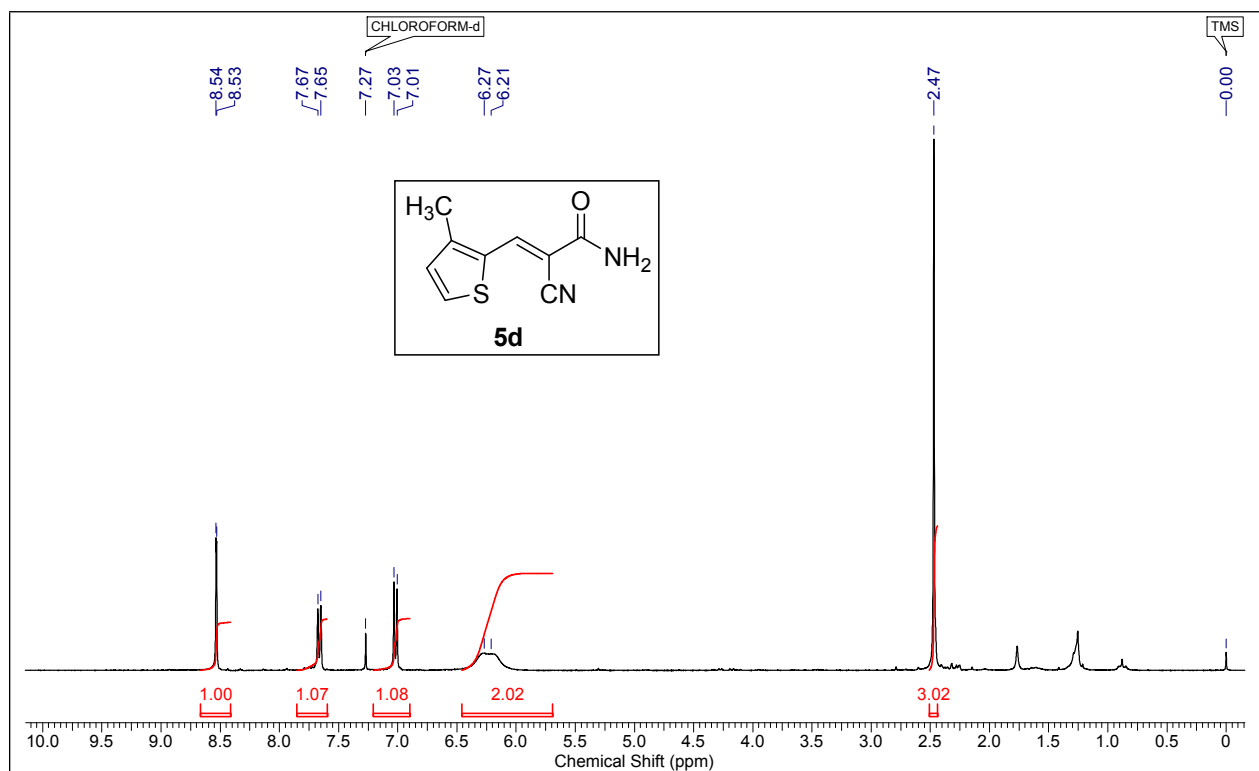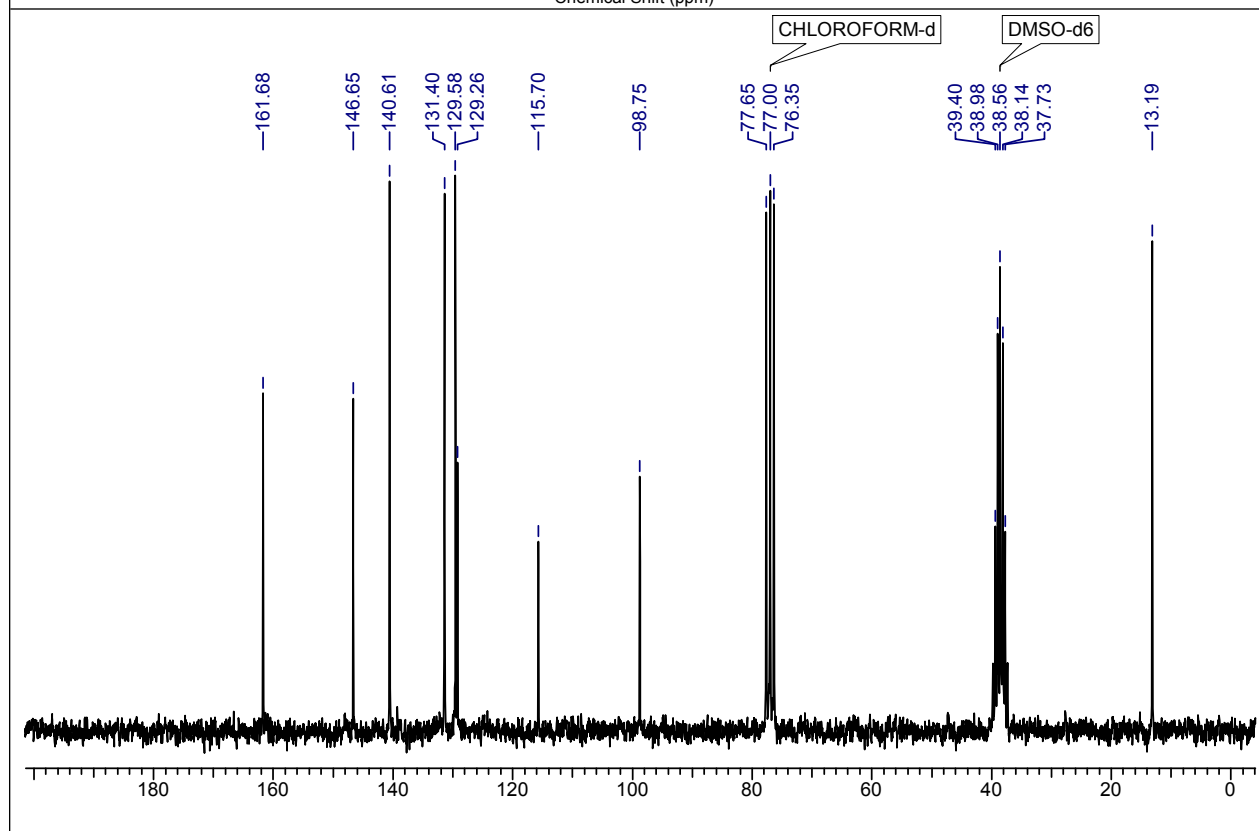

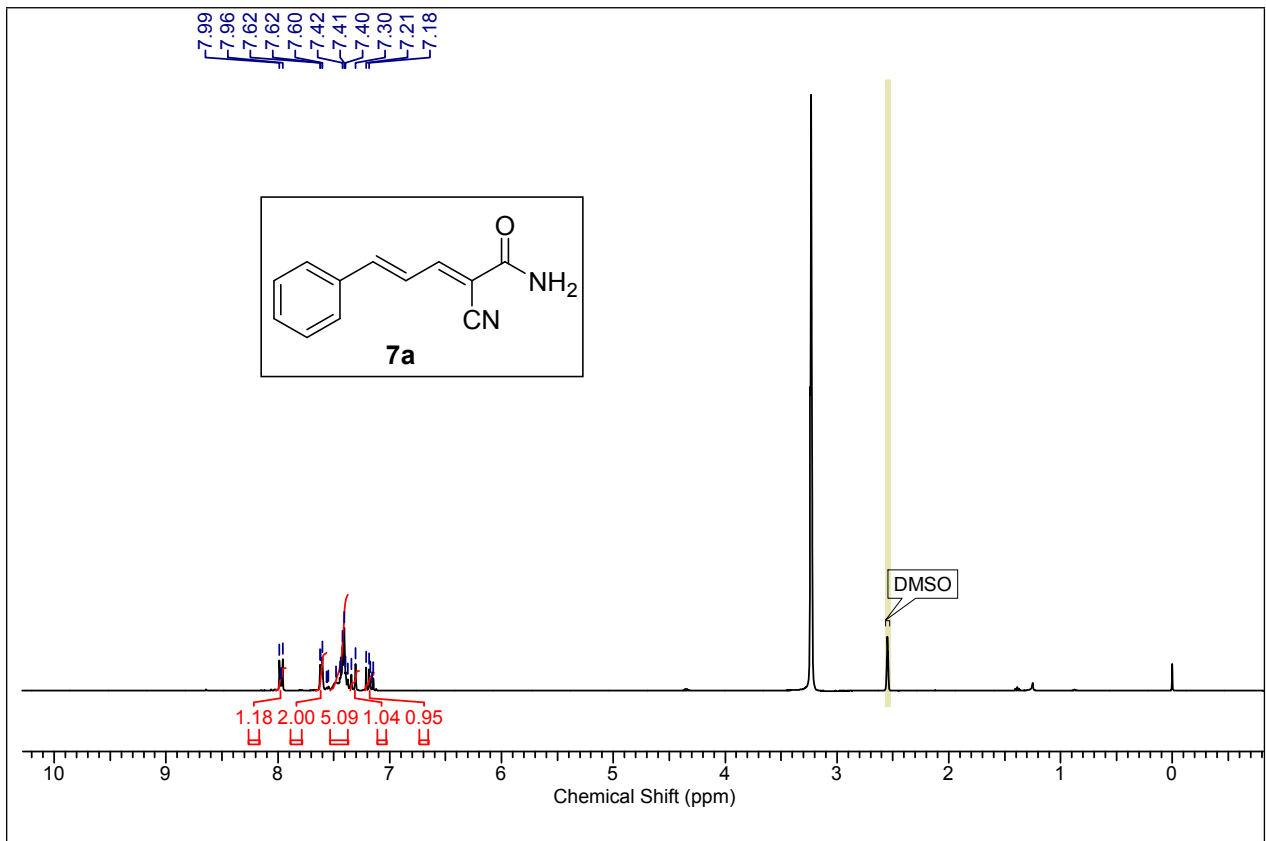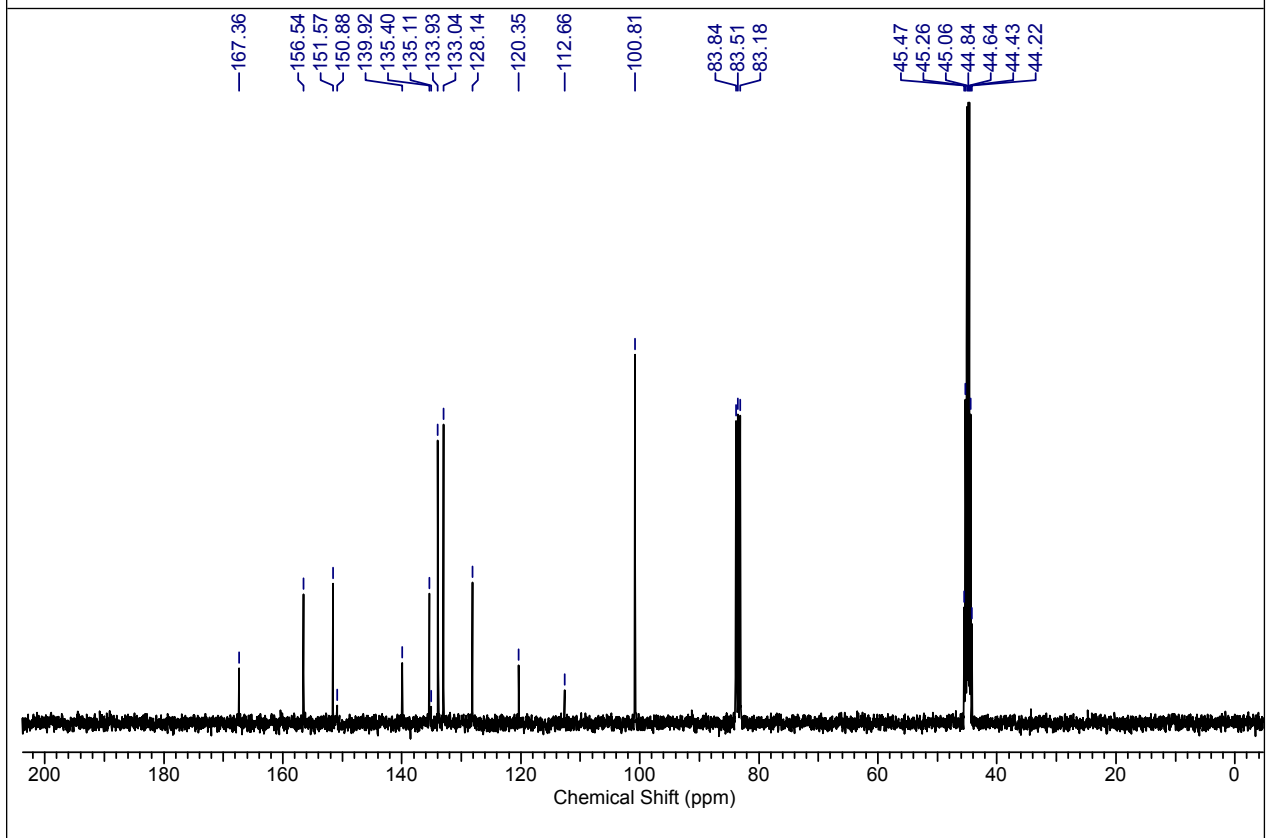

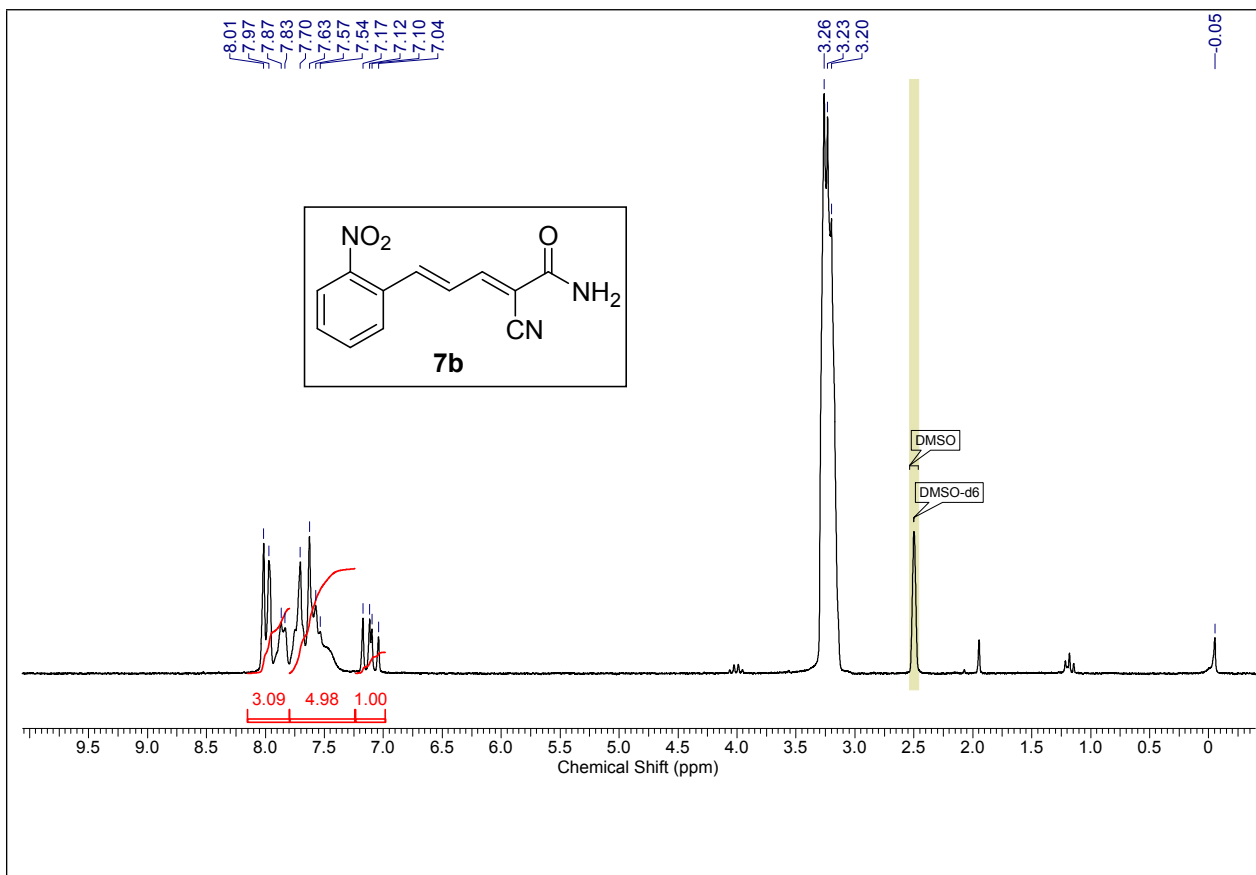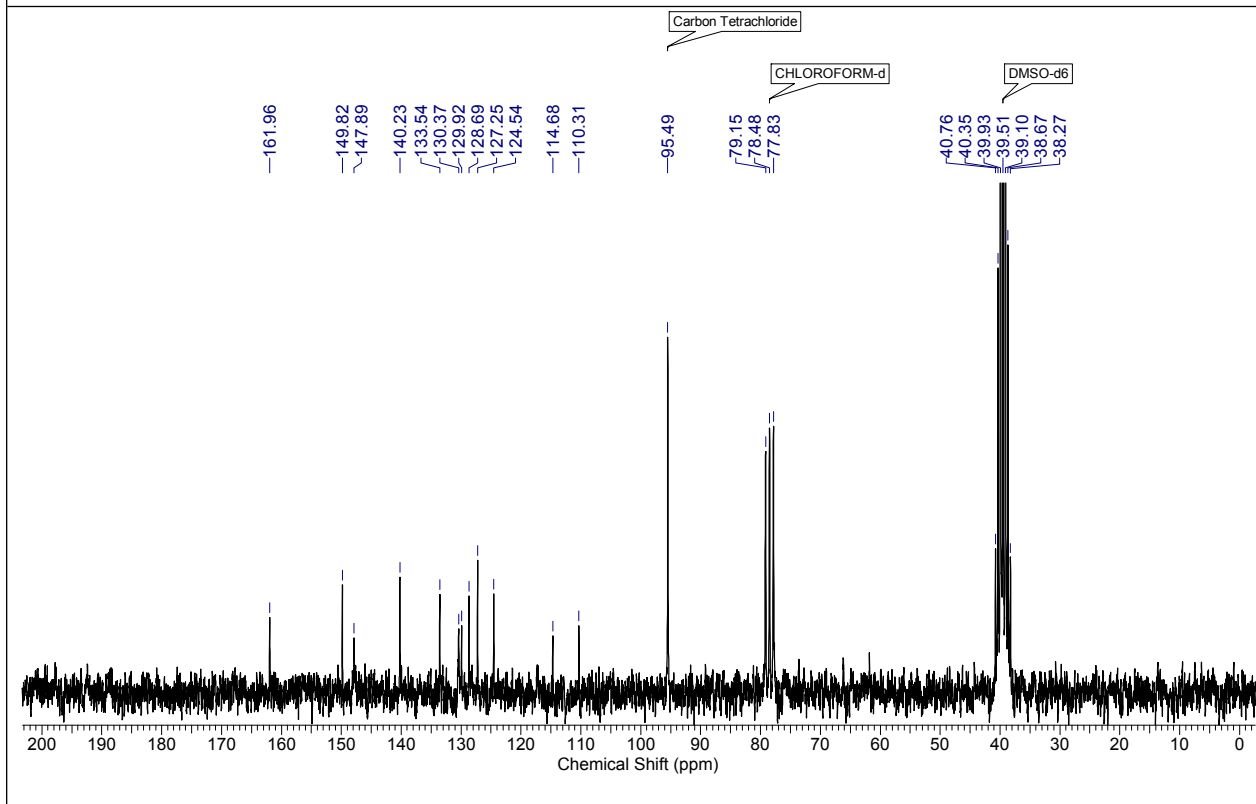

170822-120838-42840.001.001.1r.esp

CHLOROFORM-d

9.41  
8.10  
7.69  
7.67  
7.46  
7.40  
7.32  
7.31  
7.13  
7.11  
7.10  
7.00  
6.98

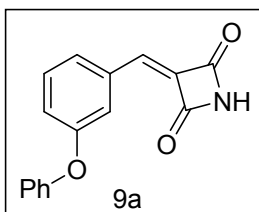

170822-120838-42840.001.001.1r.esp

CHLOROFORM-d

8.10  
7.69  
7.67  
7.46  
7.41  
7.40  
7.38  
7.34  
7.32  
7.31  
7.13  
7.11  
7.10  
7.00  
6.98

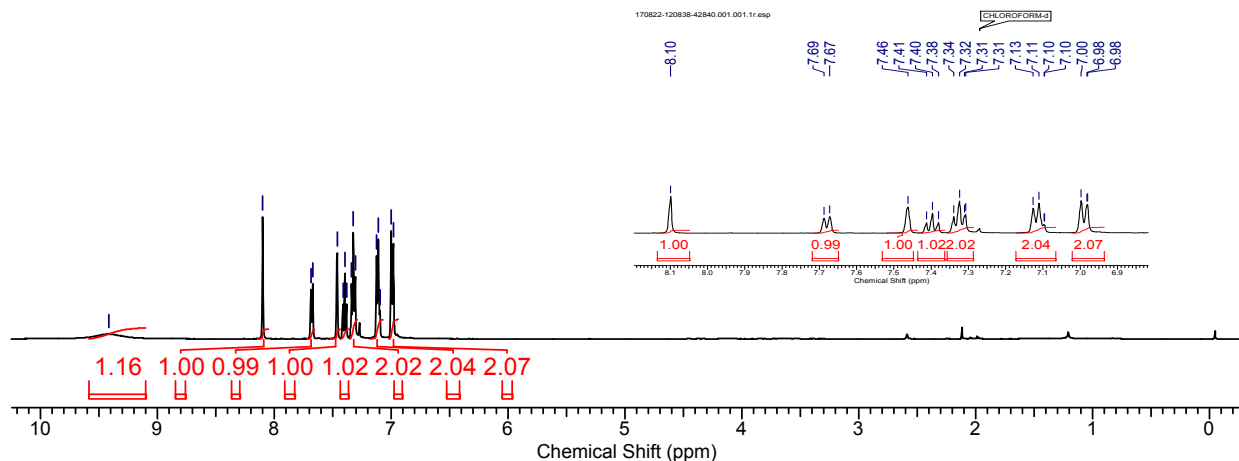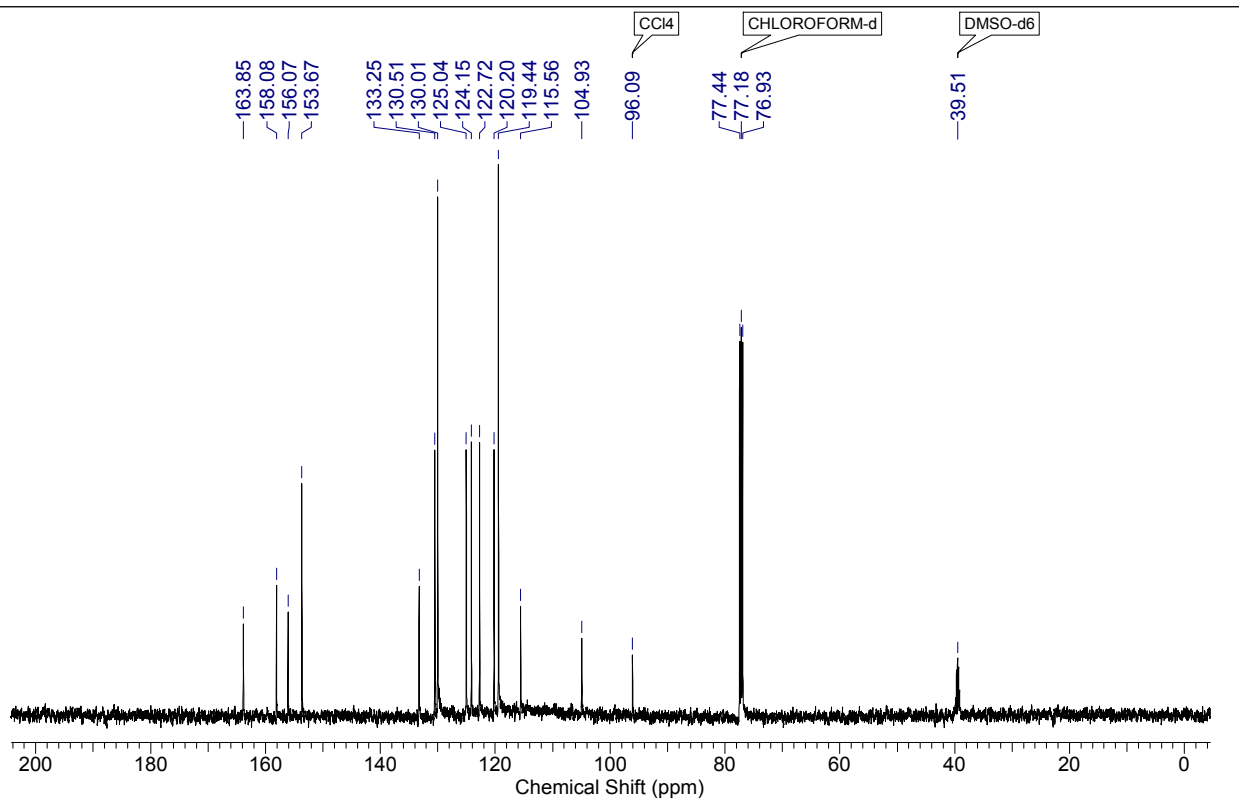

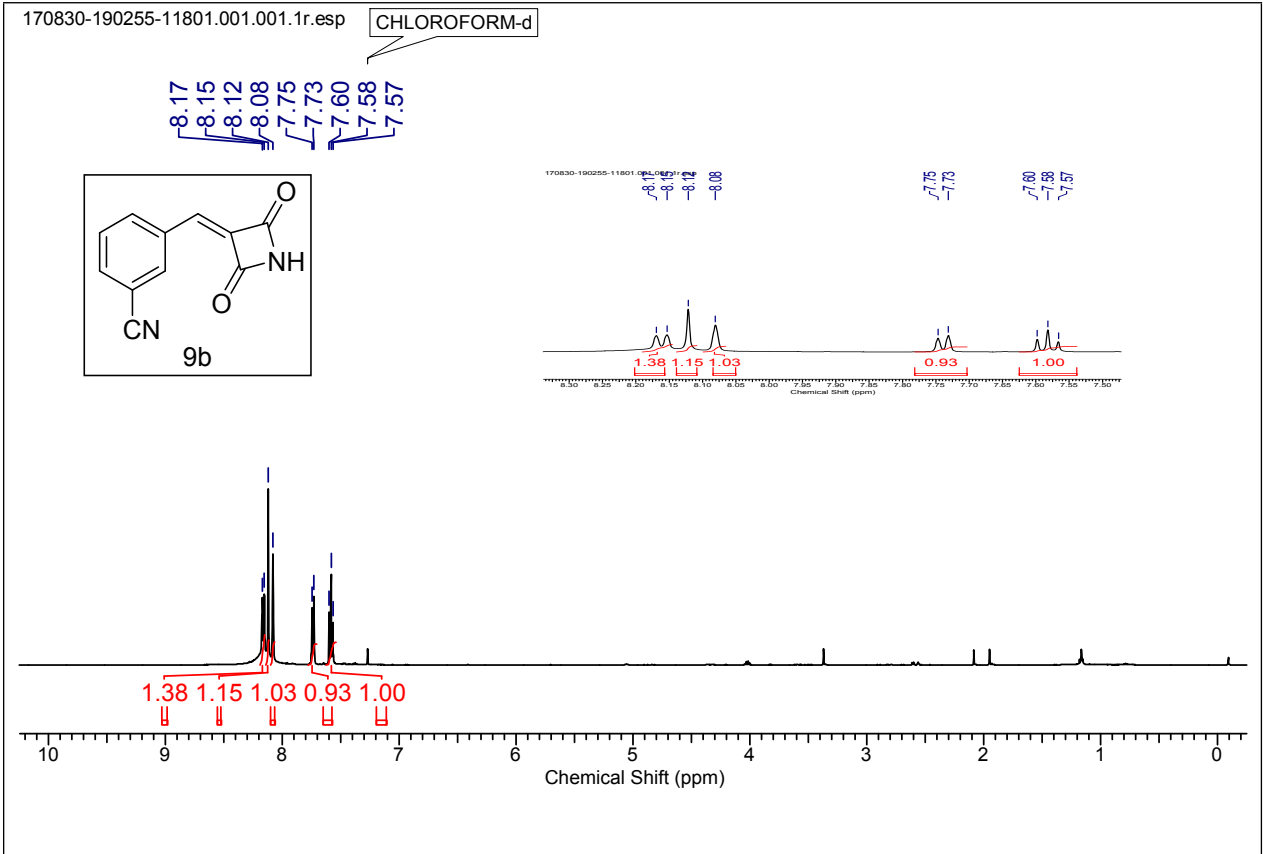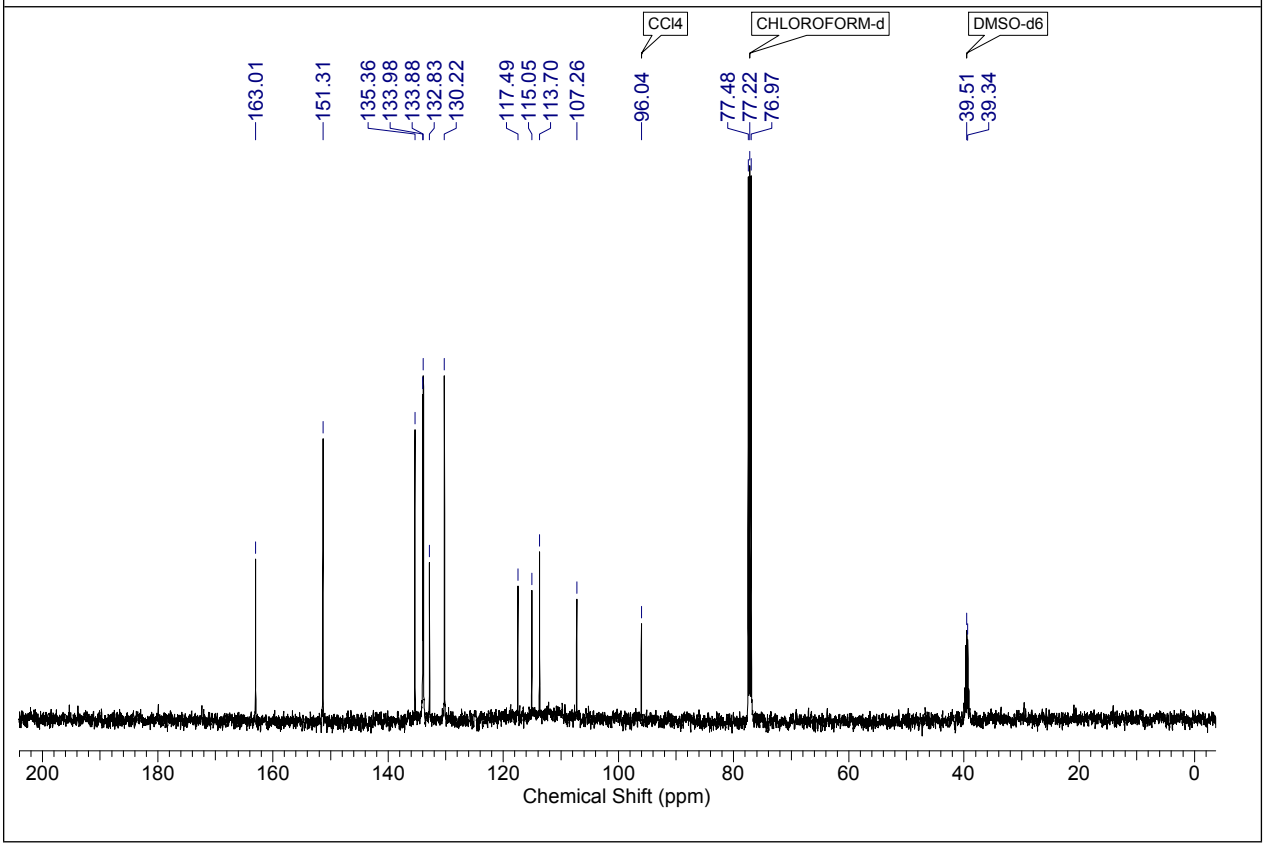



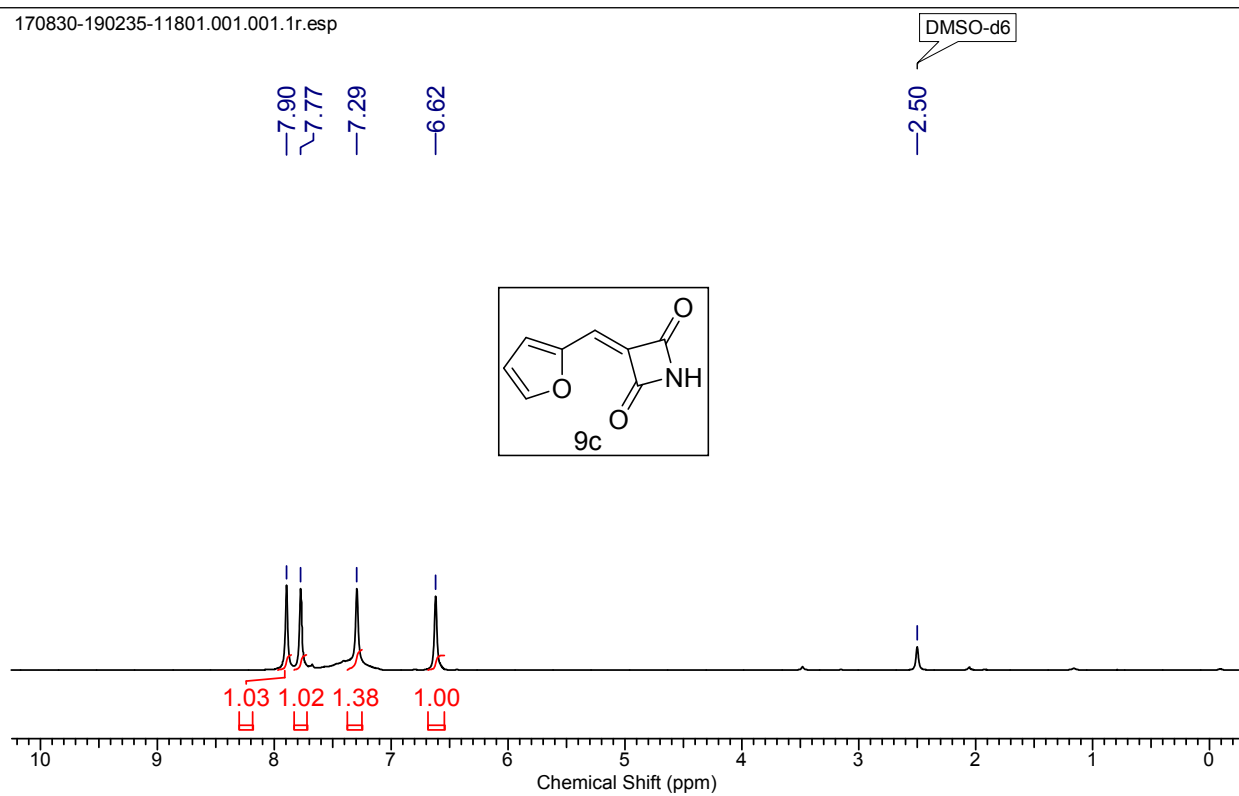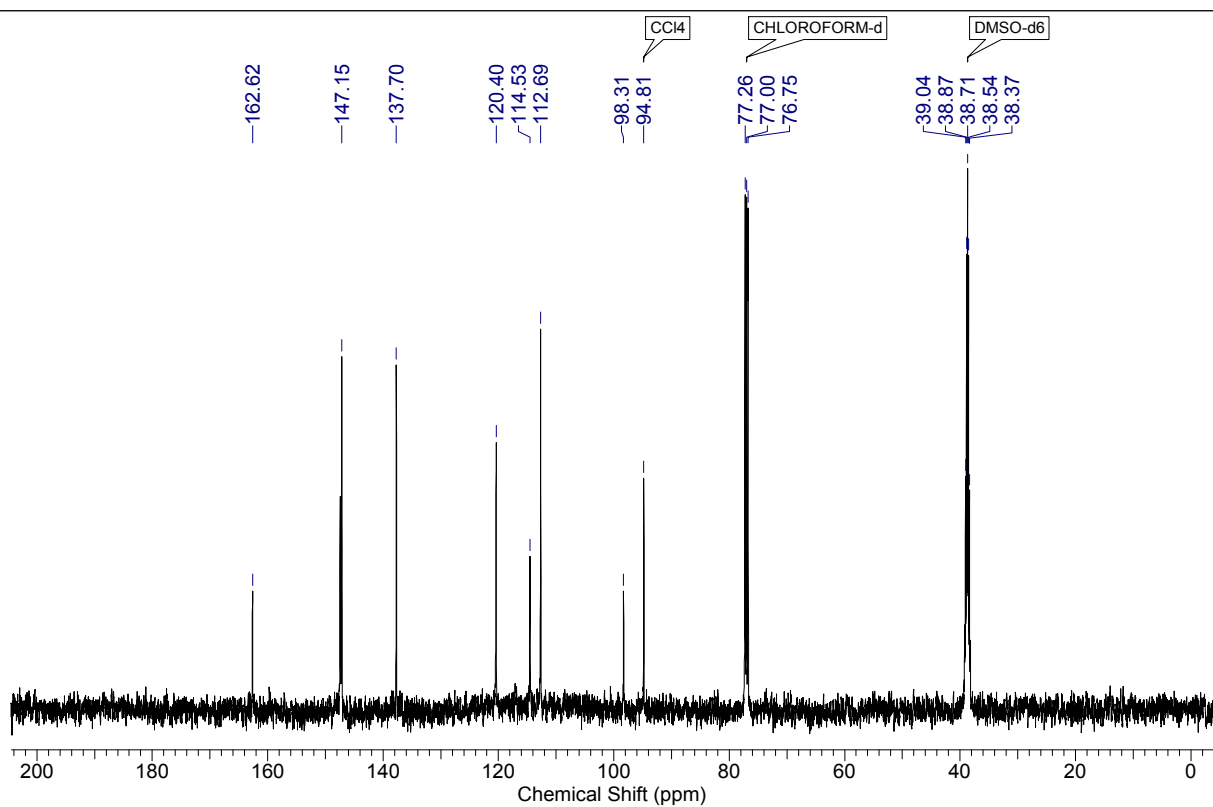

170830-120515-42840.001.001.1r.esp

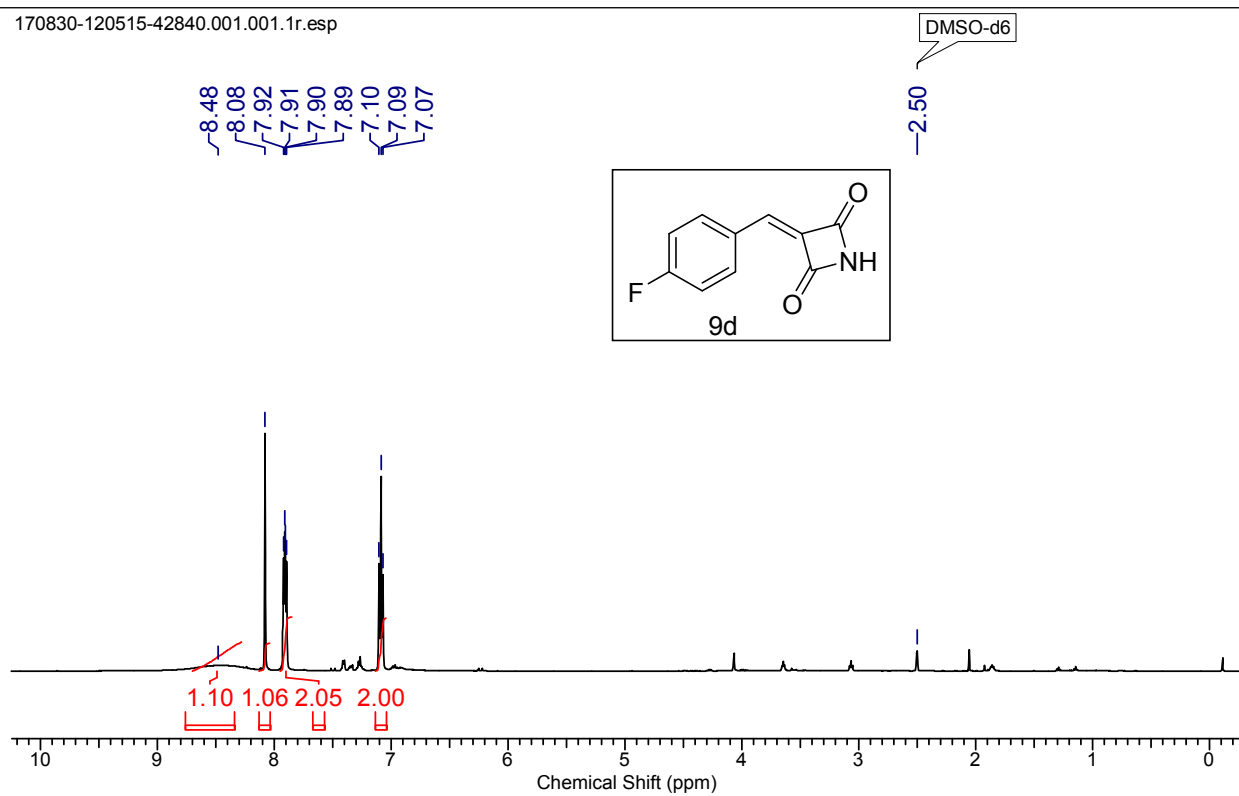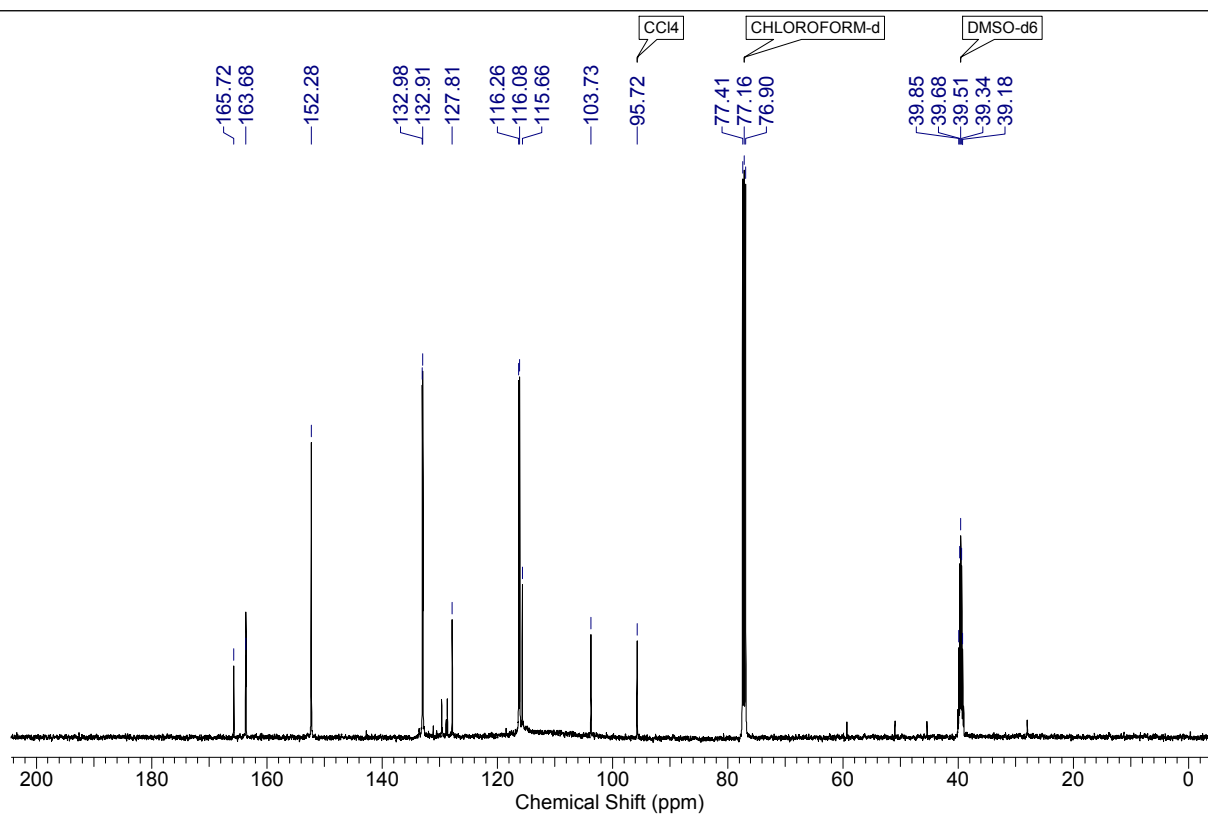

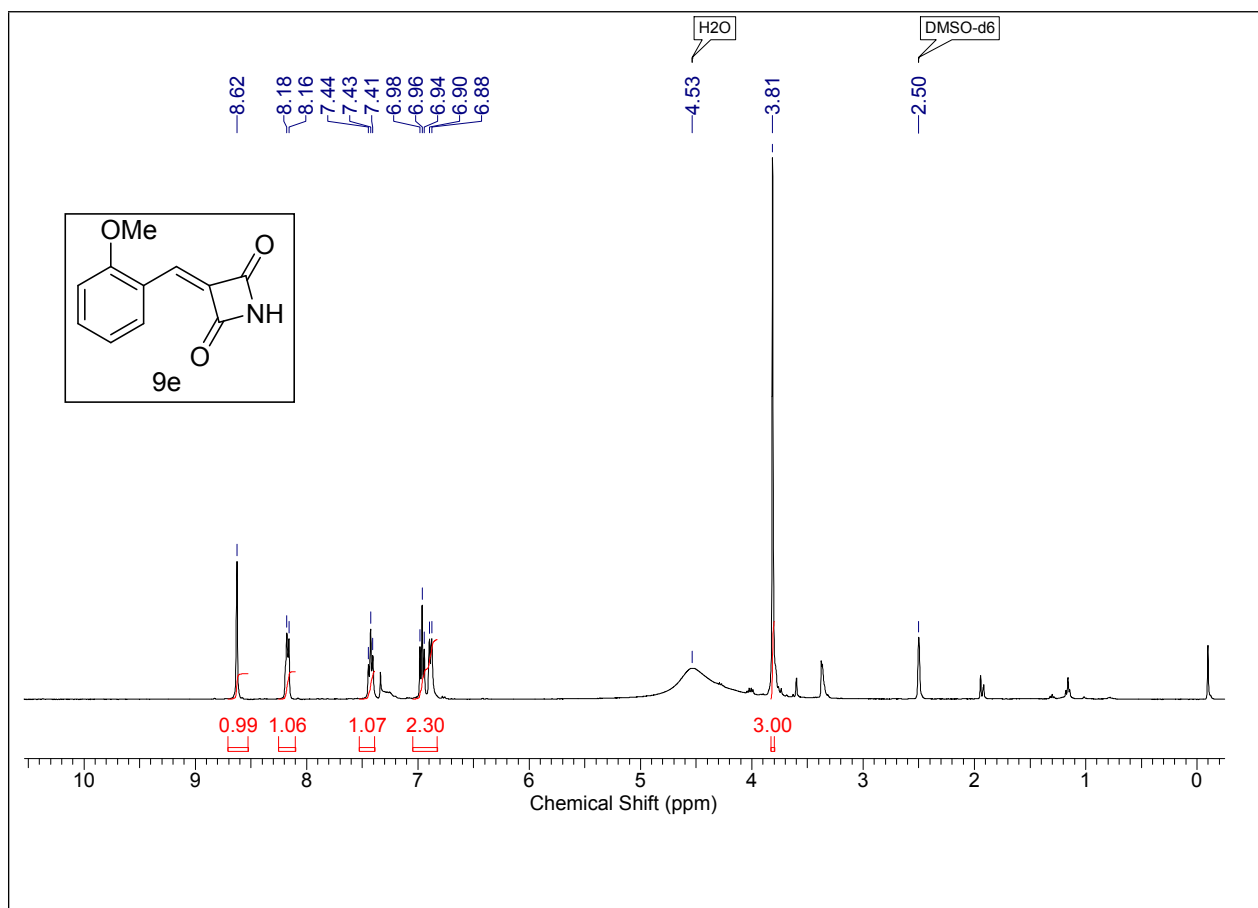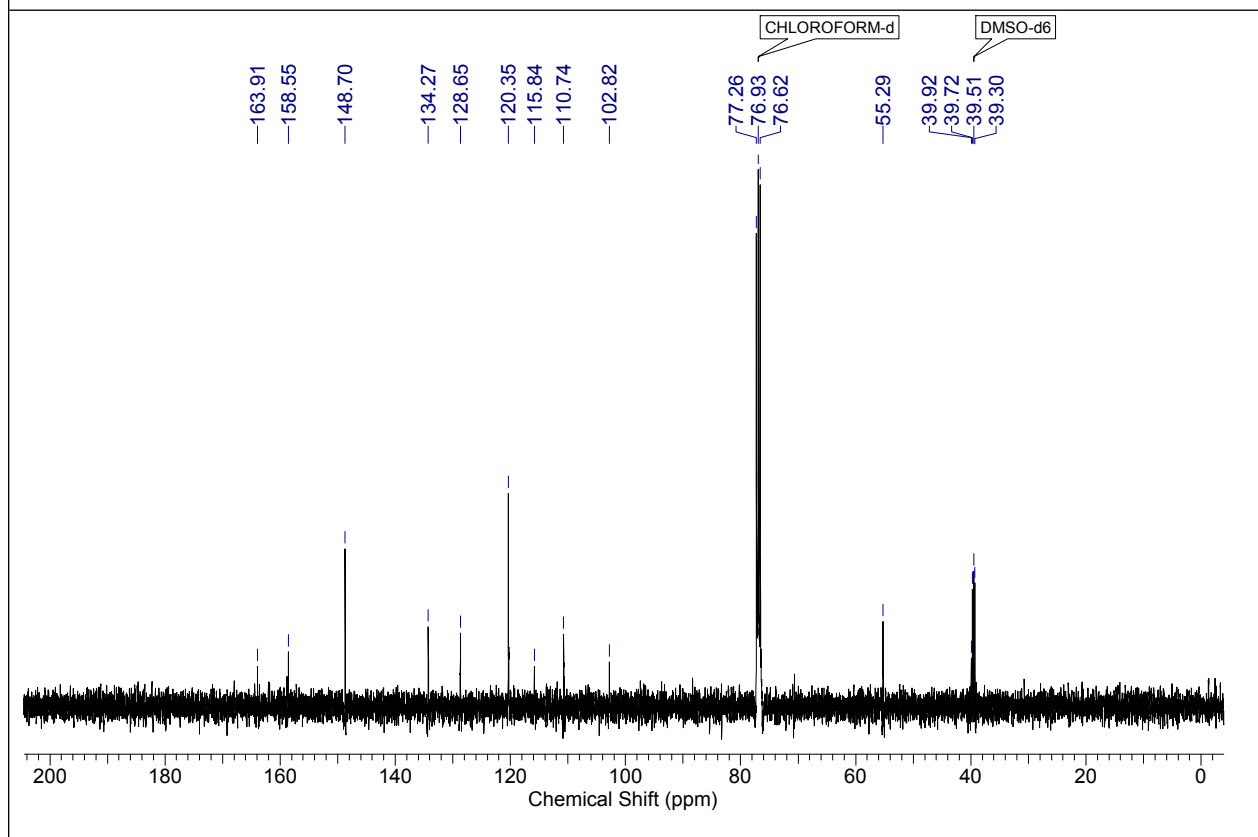

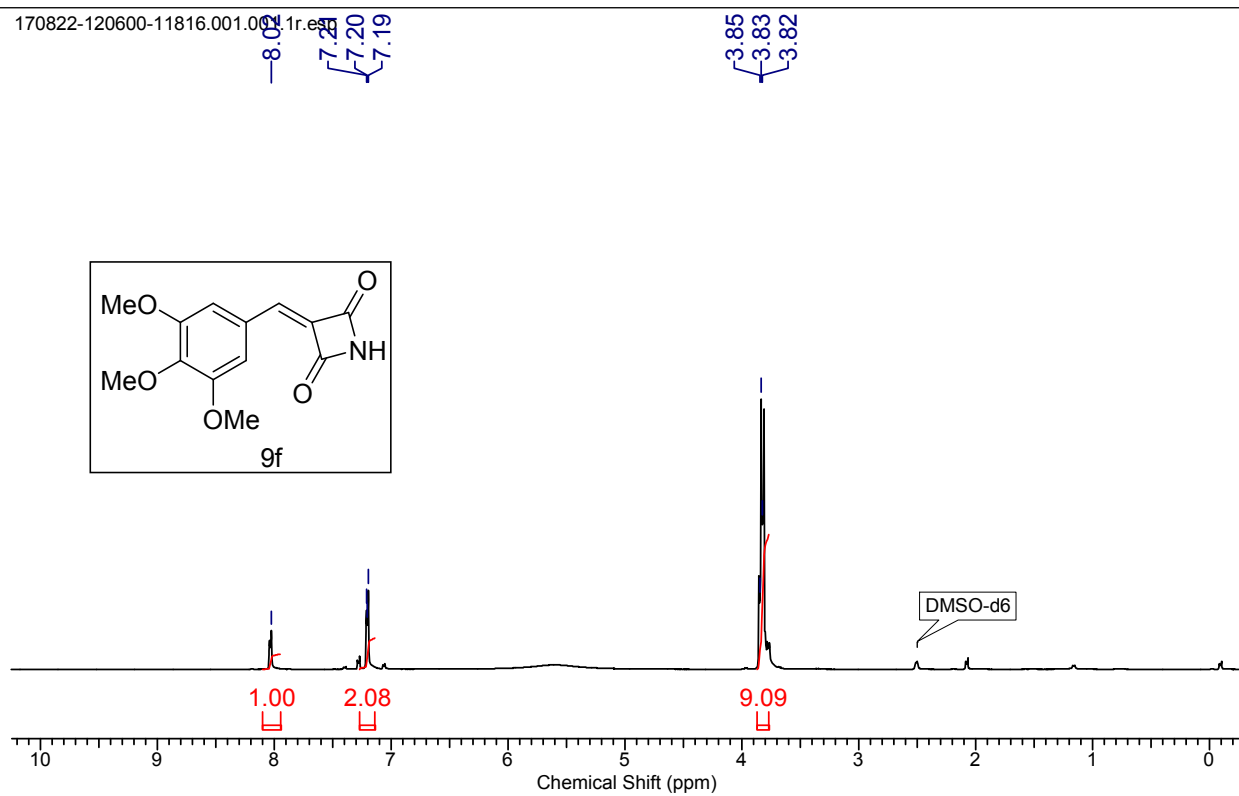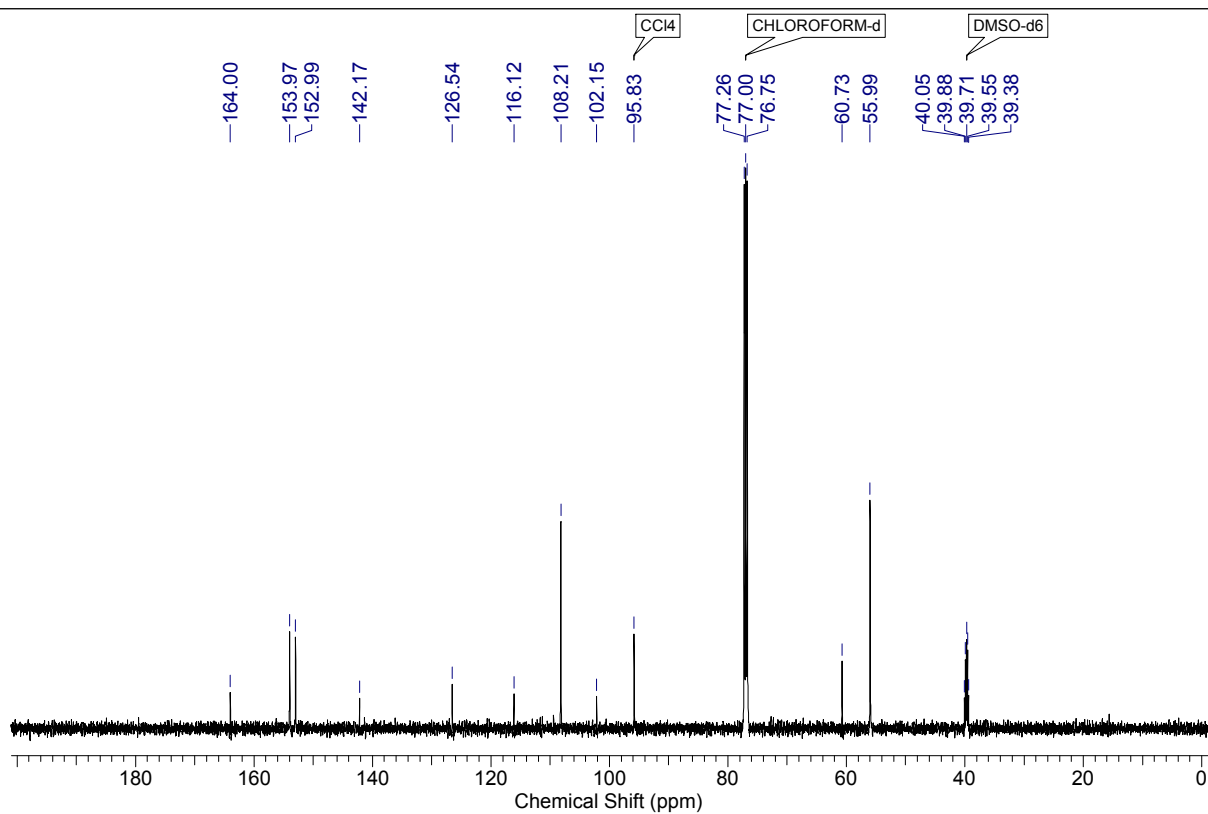

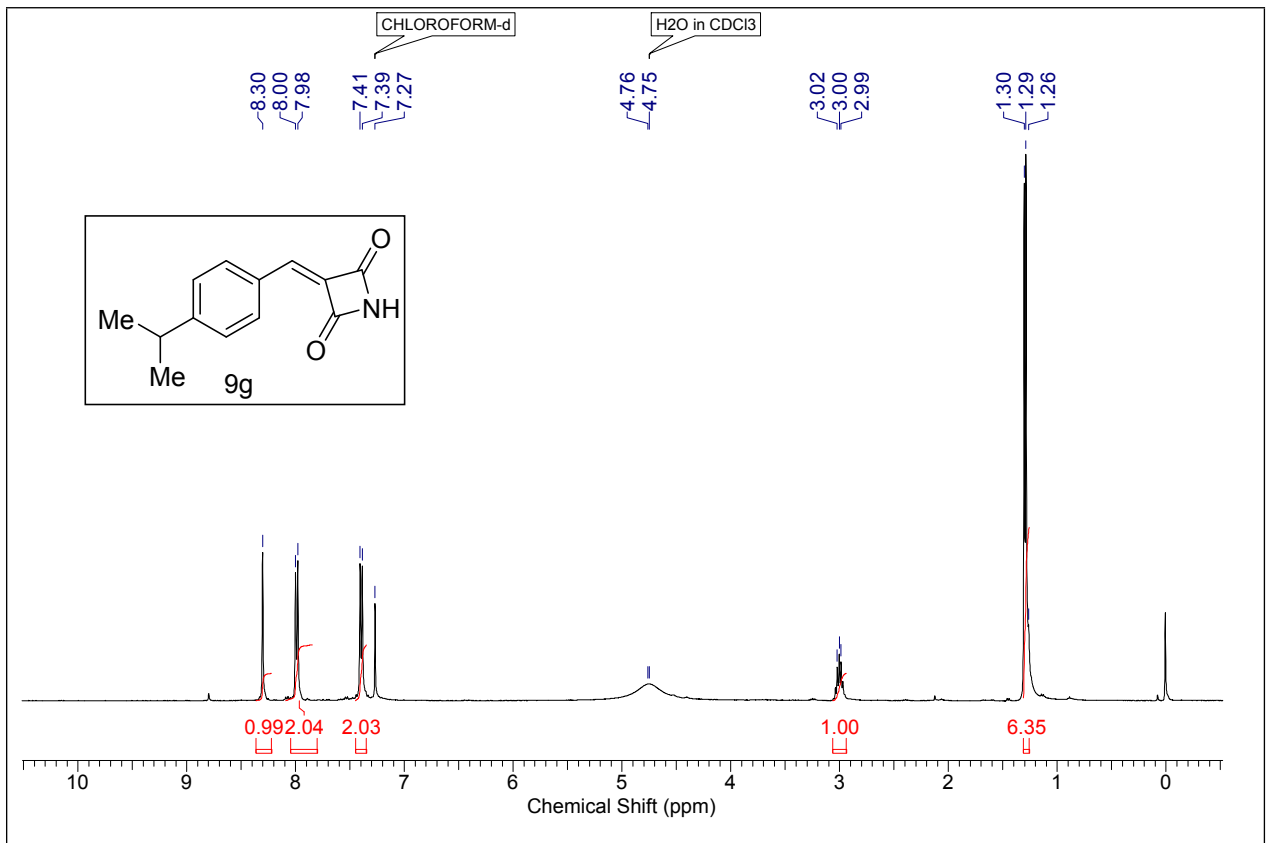

20180309-094515-11495.002.001.1r.esp

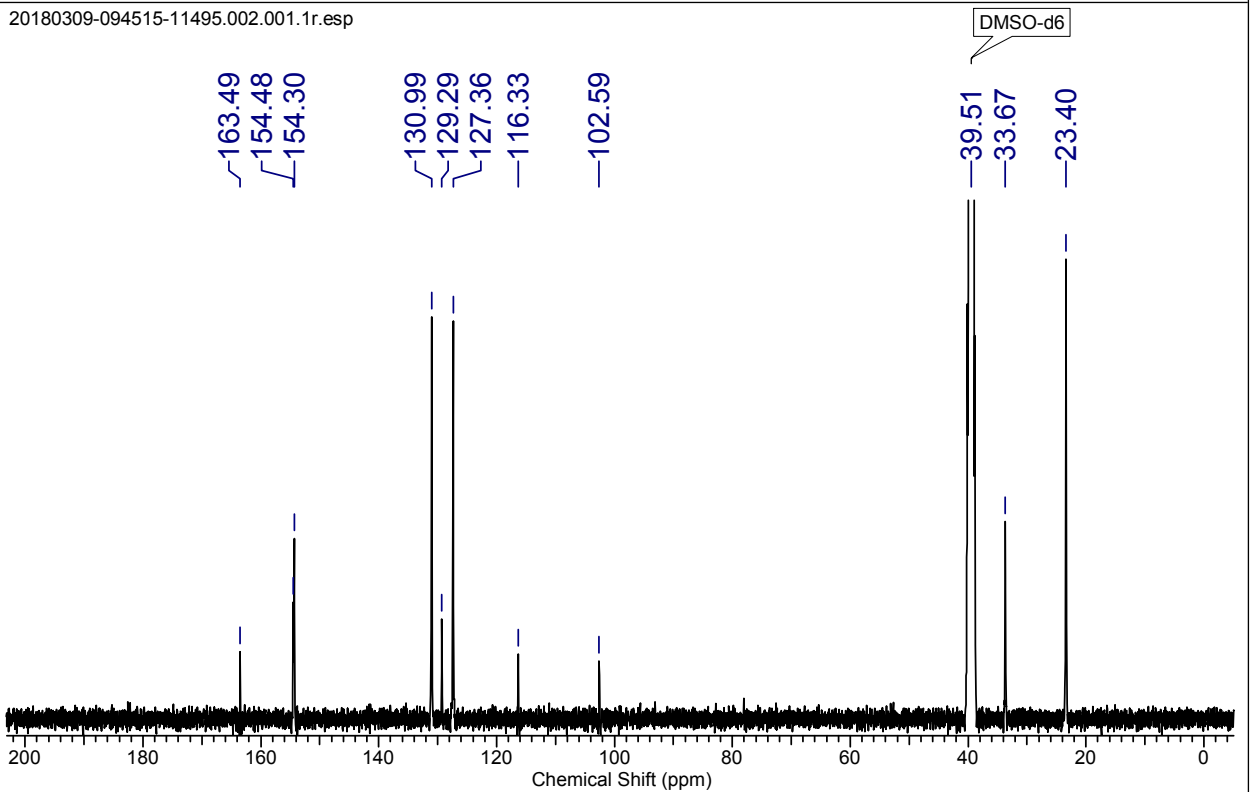

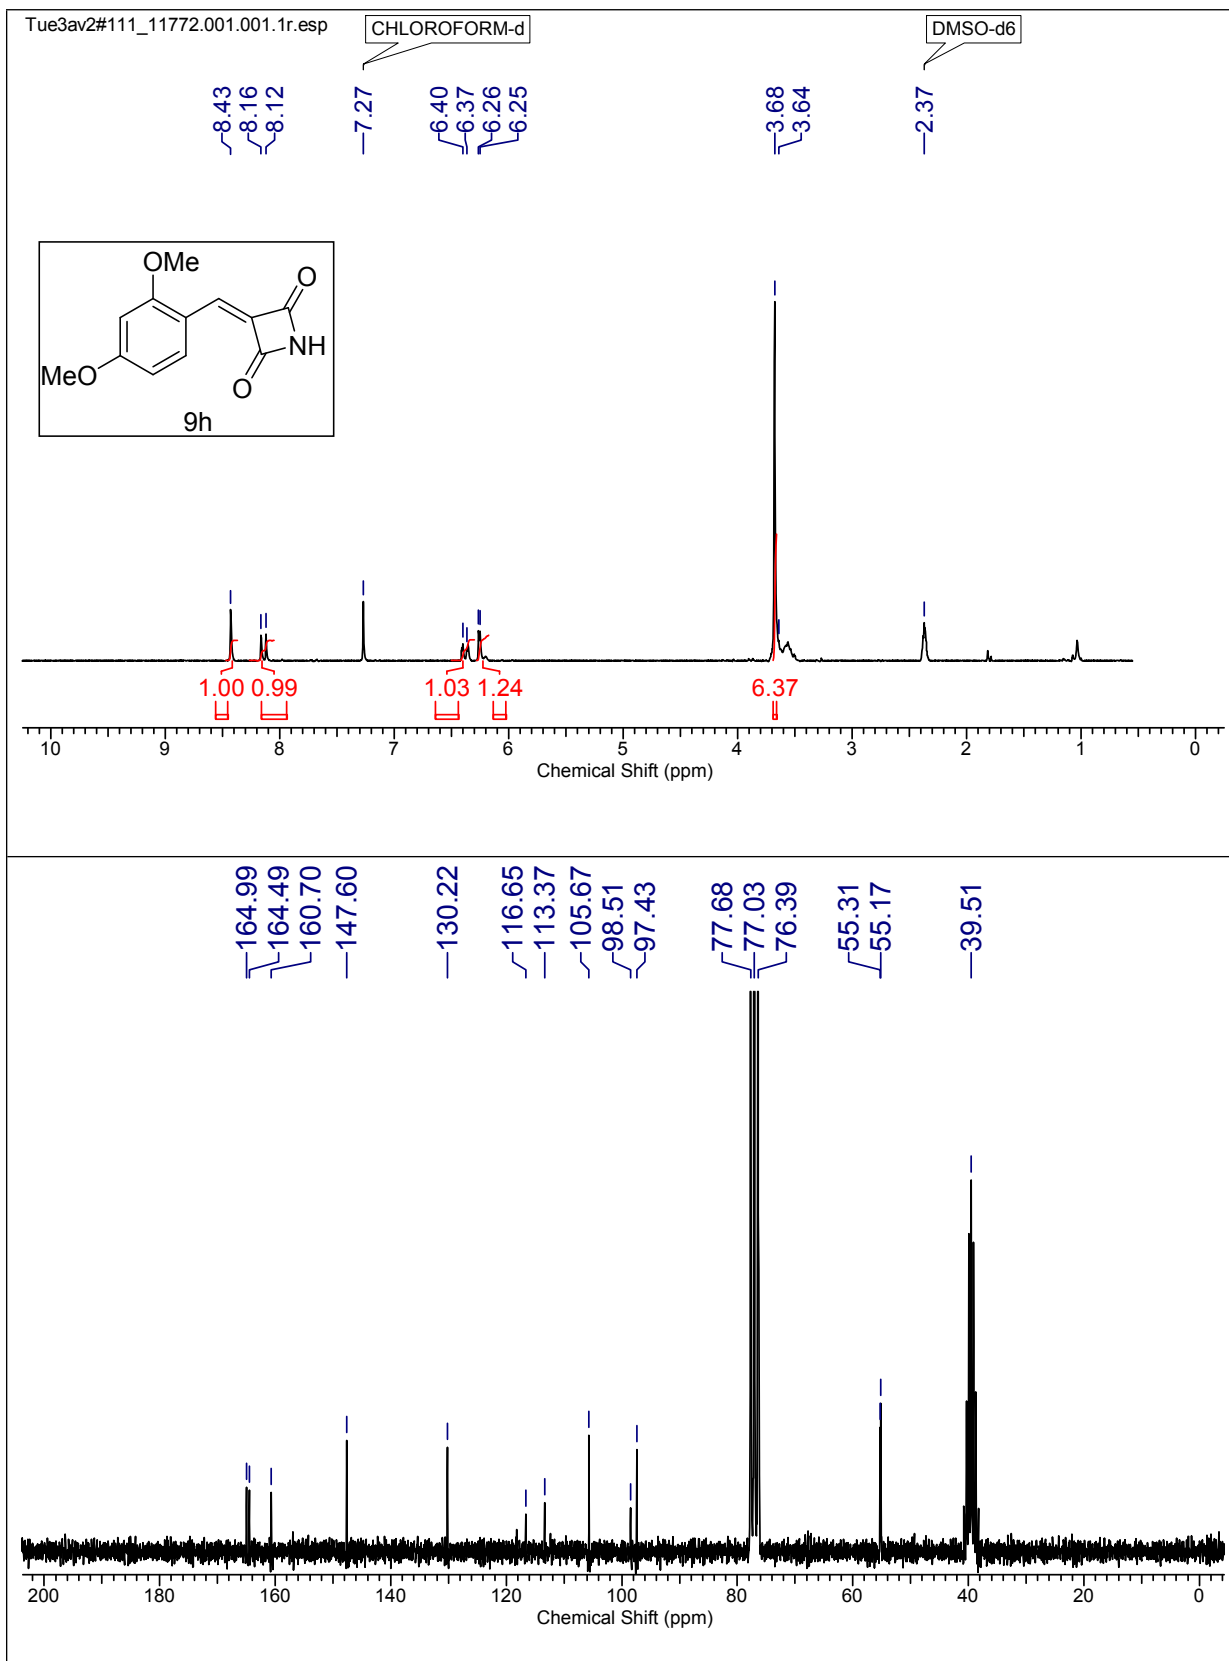

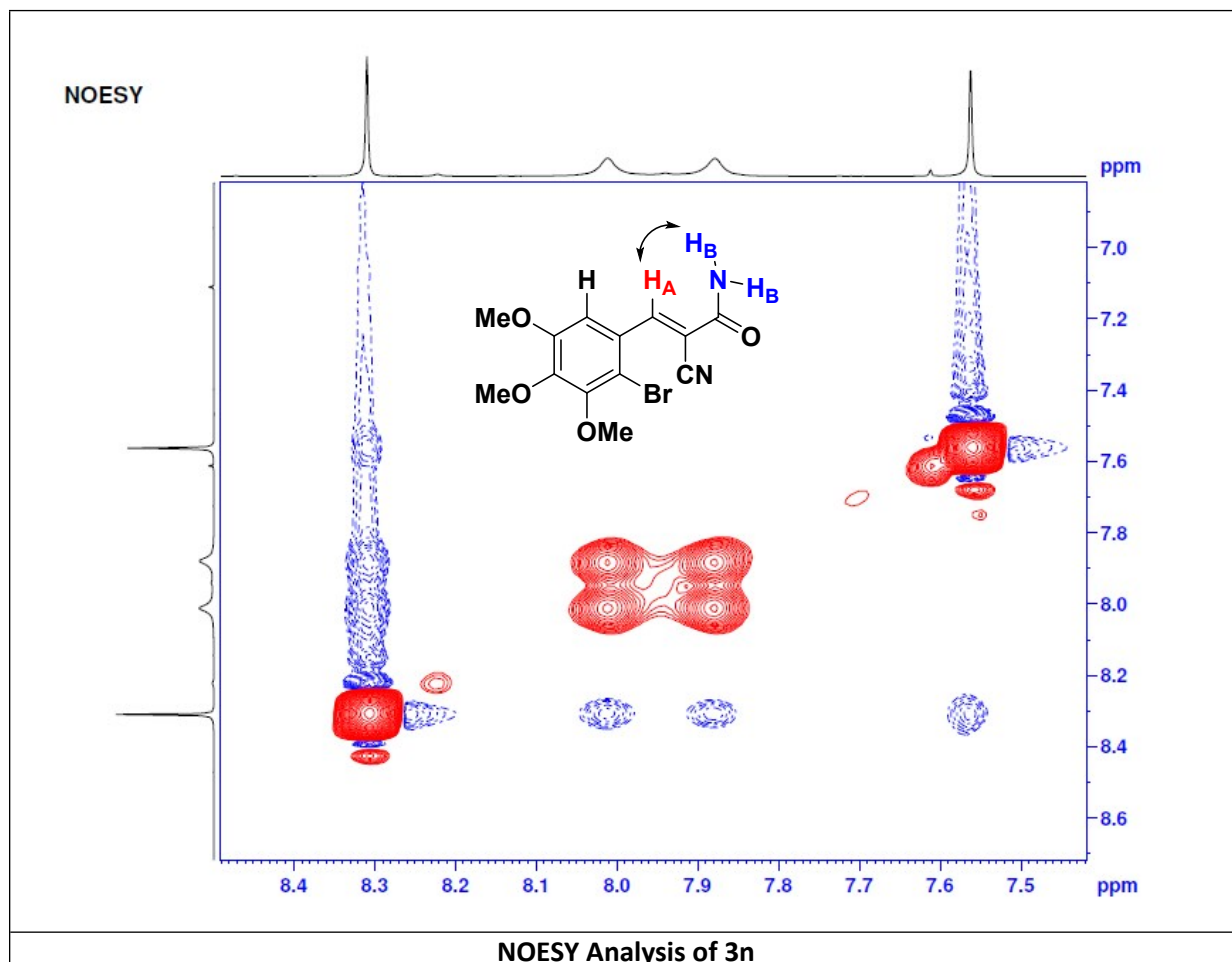

Supplement: c7nj05169g1.pdf [file c7nj05169g1.pdf]
